# Supplementary material for: Cross-sectional analysis of lithium ion electrodes using spatial autocorrelation techniques
Source: Royal Society of Chemistry journal article supplement (doi:10.1039/d2cp03094b), 2022-01-01
Supplement: d2cp03094b1.pdf [file d2cp03094b1.pdf]

### Cathode DoE

Table S1. Test Matrix and Sample Identification (Cathode DoE)

| Order    |     |        | Coating ID  | Comma bar<br>Gap / um | Coating ratio<br>/ % | Web speed<br>/ m min <sup>-1</sup> |
|----------|-----|--------|-------------|-----------------------|----------------------|------------------------------------|
| Standard | Run | Actual |             |                       |                      |                                    |
| 10       | 12  | 1      | NEX_CAT5_12 | 140                   | 130                  | 1.0                                |
| 6        | 1   | 10     | NEX_CAT6_01 | 128                   | 142                  | 0.7                                |
| 8        | 19  | 8      | NEX_CAT5_19 | 128                   | 142                  | 1.3                                |
| 2        | 6   | 15     | NEX_CAT6_06 | 128                   | 118                  | 0.7                                |
| 4        | 17  | 6      | NEX_CAT5_17 | 128                   | 118                  | 1.3                                |
| 14       | 15  | 4      | NEX_CAT5_15 | 110                   | 150                  | 1.0                                |
| 12       | 4   | 13     | NEX_CAT6_04 | 110                   | 130                  | 1.5                                |
| 18       | 2   | 11     | NEX_CAT6_02 | 110                   | 130                  | 1.0                                |
| 16       | 9   | 18     | NEX_CAT6_09 | 110                   | 130                  | 1.0                                |
| 17       | 11  | 20     | NEX_CAT5_11 | 110                   | 130                  | 1.0                                |
| 20       | 13  | 2      | NEX_CAT5_13 | 110                   | 130                  | 1.0                                |
| 19       | 16  | 5      | NEX_CAT5_16 | 110                   | 130                  | 1.0                                |
| 15       | 20  | 9      | NEX_CAT5_20 | 110                   | 130                  | 1.0                                |
| 11       | 18  | 7      | NEX_CAT5_18 | 110                   | 130                  | 0.5                                |
| 13       | 5   | 14     | NEX_CAT6_05 | 110                   | 110                  | 1.0                                |
| 7        | 7   | 16     | NEX_CAT6_07 | 92                    | 142                  | 1.3                                |
| 5        | 8   | 17     | NEX_CAT6_08 | 92                    | 142                  | 0.7                                |
| 1        | 10  | 19     | NEX_CAT6_10 | 92                    | 118                  | 0.7                                |
| 3        | 14  | 3      | NEX_CAT5_14 | 92                    | 118                  | 1.3                                |
| 9        | 3   | 12     | NEX_CAT6_03 | 80                    | 130                  | 1.0                                |

Table S2. Repeat Spatial Autocorrelation Measurements On Cathode DoE Samples

| Coating | Join Counting |      |          |      | Moran I Score |       |          |       |
|---------|---------------|------|----------|------|---------------|-------|----------|-------|
|         | Carbon        |      | Fluorine |      | Carbon        |       | Fluorine |       |
|         | Mean          | S.D. | Mean     | S.D. | Mean          | S.D.  | Mean     | S.D.  |
| Uncal.  | 86.3          | 5.1  | 44.8     | 4.4  | 0.551         | 0.014 | 0.373    | 0.009 |
| Cal.    | 82.3          | 16.6 | 38.2     | 3.0  | 0.553         | 0.059 | 0.348    | 0.021 |

NB. The repeats were coatings prepared with a blade gap of 110 um, a coating ratio of 130 %, and a coating speed of 1 m min<sup>-1</sup>, i.e. #02, #09, #11, #13, #16 and #20.

Table S3. Summary Of Results From Electrochemical Tests (Cathode DoE)

| Coating ID  | Coat Weight<br>/ gsm | ASI Resistance<br>/ $\Omega$ cm | Ratio 5 C : 0.2 C<br>/ % |
|-------------|----------------------|---------------------------------|--------------------------|
| NEX_CAT6_01 | 227                  | 53.0                            | 9.4                      |
| NEX_CAT6_02 | 183                  | 41.7                            | 29.1                     |
| NEX_CAT6_03 | 141                  | 45.8                            | 67.4                     |
| NEX_CAT6_04 | 173                  | 32.0                            | 27.4                     |
| NEX_CAT6_05 | 148                  | 54.5                            | 61.5                     |
| NEX_CAT6_06 | 185                  | 61.5                            | 33.7                     |
| NEX_CAT6_07 | 174                  | 46.8                            | 37.7                     |
| NEX_CAT6_08 | 174                  | 48.8                            | 45.1                     |
| NEX_CAT6_09 | 178                  | 47.1                            | 32.3                     |
| NEX_CAT6_10 | 144                  | 62.5                            | 69.9                     |
| NEX_CAT5_11 | 182                  | 34.9                            | 34.9                     |
| NEX_CAT5_12 | 218                  | 46.7                            | 16.9                     |
| NEX_CAT5_13 | 180                  | 48.4                            | 48.6                     |
| NEX_CAT5_14 | 143                  | 49.5                            | 64.4                     |
| NEX_CAT5_15 | 230                  | 44.0                            | 7.2                      |
| NEX_CAT5_16 | 180                  | 47.0                            | 45.7                     |
| NEX_CAT5_17 | 187                  | 37.6                            | 40.1                     |
| NEX_CAT5_18 | 182                  | 42.0                            | 35.0                     |
| NEX_CAT5_19 | 220                  | 28.9                            | 11.9                     |
| NEX_CAT5_20 | 177                  | 36.3                            | 31.5                     |

Table S4. Correlation Coefficients From Linear Regression (Cathode DoE)

| Figure | X Parameter     | Y Parameter                 | R <sup>2</sup> (carbon)       | R <sup>2</sup> (fluorine)   |
|--------|-----------------|-----------------------------|-------------------------------|-----------------------------|
| 4A     | Comma Bar Gap   | Join Count Z <sub>1-1</sub> | 0.032                         | 0.0005                      |
| 4B     | Coating Speed   | Join Count Z <sub>1-1</sub> | 0.110                         | 0.0593                      |
| 4C     | Coat Weight     | Join Count Z <sub>1-1</sub> | 0.095                         | 0.0008                      |
| 5A     | ASI             | Join Count Z <sub>1-1</sub> | 0.132                         | 0.0274                      |
| 5B     | Ratio 5C : 0.2C | Join Count Z <sub>1-1</sub> | 0.034                         | 0.0063                      |
| 5C     | ASI             | Moran I Score               | 0.092                         | 0.1750                      |
|        |                 |                             | R <sup>2</sup> (uncalendered) | R <sup>2</sup> (calendered) |
| 6C     | Moran (Carbon)  | Moran (Fluorine)            | 0.450                         | 0.775                       |

Table S5. Join Count Analysis Of Carbon EDS Maps (Cathode DoE, Uncalendered)

| Carbon   | Coverage       | Experiment / % |       |       | Join Count Z Score |       |       |
|----------|----------------|----------------|-------|-------|--------------------|-------|-------|
|          | Proportion / % | 1 – 1          | 0 – 1 | 0 - 0 | 1 – 1              | 0 – 1 | 0 - 0 |
| CAT6_01A | 10.20          | 4.5            | 11.3  | 84.2  | 92.9               | -44.8 | 22.2  |
| CAT6_02A | 10.12          | 4.5            | 11.3  | 84.2  | 91.4               | -44.8 | 22.5  |
| CAT6_03A | 9.90           | 4.6            | 10.6  | 84.8  | 94.5               | -49.6 | 26.8  |
| CAT6_04A | 10.03          | 4.8            | 10.4  | 84.8  | 99.1               | -50.3 | 26.3  |
| CAT6_05A | 10.05          | 5.1            | 9.9   | 85.1  | 106.4              | -54.2 | 28.4  |
| CAT6_06B | 9.82           | 3.8            | 12.0  | 84.2  | 72.9               | -39.8 | 22.2  |
| CAT6_07A | 10.30          | 4.4            | 11.7  | 83.9  | 90.0               | -41.9 | 20.0  |
| CAT6_08B | 10.01          | 4.2            | 11.5  | 84.3  | 84.2               | -43.3 | 23.0  |
| CAT6_09A | 9.85           | 4.2            | 11.1  | 84.7  | 84.8               | -46.1 | 25.7  |
| CAT6_10B | 10.12          | 4.7            | 10.8  | 84.5  | 96.7               | -47.8 | 24.3  |
| CAT5_11B | 10.31          | 4.5            | 11.7  | 83.9  | 90.4               | -42.3 | 20.2  |
| CAT5_12B | 10.12          | 4.4            | 11.5  | 84.1  | 89.2               | -43.6 | 21.9  |
| CAT5_13A | 10.00          | 4.4            | 11.2  | 84.4  | 89.9               | -45.5 | 23.7  |
| CAT5_14B | 9.80           | 4.0            | 11.6  | 84.4  | 79.6               | -42.8 | 23.7  |
| CAT5_16B | 10.02          | 4.2            | 11.5  | 84.3  | 84.9               | -43.6 | 23.1  |
| CAT5_17A | 9.85           | 4.3            | 11.0  | 84.7  | 85.8               | -46.6 | 25.9  |
| CAT5_18C | 9.89           | 5.5            | 8.7   | 85.8  | 117.8              | -61.9 | 33.5  |
| CAT5_19B | 9.92           | 4.1            | 11.6  | 84.3  | 82.3               | -42.9 | 23.0  |
| CAT5_20A | 9.66           | 3.9            | 11.4  | 84.7  | 76.5               | -44.0 | 25.7  |

Table S6. Join Count Analysis Of Fluorine EDS Maps (Cathode DoE, Uncalendered)

| Fluorine | Coverage       | Experiment / % |       |       | Join Count Z Score |       |       |
|----------|----------------|----------------|-------|-------|--------------------|-------|-------|
|          | Proportion / % | 1 - 1          | 0 - 1 | 0 - 0 | 1 - 1              | 0 - 1 | 0 - 0 |
| CAT6_01A | 9.86           | 2.7            | 14.4  | 82.9  | 43.6               | -24.1 | 13.6  |
| CAT6_02A | 10.14          | 2.8            | 14.7  | 82.5  | 47.7               | -21.9 | 10.3  |
| CAT6_03A | 10.06          | 2.6            | 14.9  | 82.5  | 41.6               | -20.5 | 10.4  |
| CAT6_04A | 9.97           | 2.9            | 14.1  | 83.0  | 50.2               | -25.9 | 13.7  |
| CAT6_05A | 9.86           | 2.6            | 14.4  | 82.9  | 43.0               | -23.8 | 13.5  |
| CAT6_06B | 10.05          | 2.4            | 15.3  | 82.3  | 36.7               | -18.4 | 9.5   |
| CAT6_07A | 10.12          | 2.7            | 14.7  | 82.5  | 45.8               | -21.9 | 10.7  |
| CAT6_08B | 10.15          | 2.6            | 15.0  | 82.4  | 43.0               | -20.3 | 9.8   |
| CAT6_09A | 10.12          | 2.7            | 14.8  | 82.5  | 44.8               | -21.3 | 10.4  |
| CAT6_10B | 10.01          | 3.2            | 13.7  | 83.1  | 57.4               | -28.9 | 15.0  |
| CAT5_11B | 10.08          | 2.8            | 14.5  | 82.7  | 47.6               | -23.4 | 11.9  |
| CAT5_12B | 10.09          | 2.8            | 14.7  | 82.5  | 46.4               | -22.1 | 10.8  |
| CAT5_13A | 9.93           | 2.5            | 14.9  | 82.6  | 39.2               | -20.6 | 11.1  |
| CAT5_14B | 10.08          | 2.6            | 15.0  | 82.4  | 41.3               | -19.8 | 9.8   |
| CAT5_16B | 10.03          | 2.5            | 15.0  | 82.5  | 38.8               | -19.8 | 10.4  |
| CAT5_17A | 9.99           | 2.8            | 14.4  | 82.8  | 47.0               | -24.2 | 12.8  |
| CAT5_18C | 10.10          | 3.3            | 13.6  | 83.1  | 60.4               | -29.6 | 14.9  |
| CAT5_19B | 10.18          | 2.7            | 15.0  | 82.3  | 43.5               | -19.8 | 9.2   |
| CAT5_20A | 9.99           | 2.9            | 14.2  | 82.9  | 50.4               | -25.5 | 13.3  |



Table S7. Moran Analysis Of EDS Maps For Cathode DoE (Uncalendered)

| Sample   | Carbon    |      |       | Fluorine  |      |       |
|----------|-----------|------|-------|-----------|------|-------|
|          | Threshold | Mean | Moran | Threshold | Mean | Moran |
| CAT6_01A | 42        | 14.4 | 0.567 | 51        | 13.8 | 0.388 |
| CAT6_02A | 36        | 11.5 | 0.548 | 39        | 10.2 | 0.372 |
| CAT6_03A | 38        | 12.1 | 0.581 | 46        | 12.3 | 0.374 |
| CAT6_04A | 51        | 17.7 | 0.598 | 55        | 15.7 | 0.413 |
| CAT6_05A | 37        | 12.8 | 0.651 | 44        | 11.5 | 0.380 |
| CAT6_06B | 33        | 10.6 | 0.549 | 43        | 11.3 | 0.340 |
| CAT6_07A | 23        | 7.8  | 0.549 | 41        | 10.7 | 0.372 |
| CAT6_08B | 37        | 11.9 | 0.535 | 46        | 12.4 | 0.369 |
| CAT6_09A | 35        | 11.0 | 0.552 | 42        | 11.1 | 0.369 |
| CAT6_10B | 32        | 9.7  | 0.609 | 35        | 9.0  | 0.411 |
| CAT5_11B | 22        | 7.4  | 0.534 | 20        | 5.2  | 0.382 |
| CAT5_12B | 40        | 13.4 | 0.552 | 45        | 11.9 | 0.386 |
| CAT5_13A | 44        | 14.3 | 0.568 | 24        | 6.5  | 0.376 |
| CAT5_14B | 42        | 14.2 | 0.533 | 47        | 12.8 | 0.372 |
| CAT5_16B | 22        | 7.2  | 0.570 | 44        | 11.8 | 0.356 |
| CAT5_17A | 43        | 14.2 | 0.553 | 29        | 7.7  | 0.394 |
| CAT5_18C | 29        | 9.7  | 0.680 | 46        | 12.3 | 0.448 |
| CAT5_19B | 41        | 13.8 | 0.540 | 50        | 14.0 | 0.376 |
| CAT5_20A | 20        | 6.0  | 0.536 | 36        | 9.3  | 0.384 |

Table S8. Join Count Analysis Of Carbon EDS Maps (Cathode DoE, Calendered)

| Carbon   | Coverage       | Experiment / % |       |       | Join Count Z Score |       |       |
|----------|----------------|----------------|-------|-------|--------------------|-------|-------|
|          | Proportion / % | 1 – 1          | 0 – 1 | 0 - 0 | 1 – 1              | 0 – 1 | 0 - 0 |
| CAT6_01A | 9.80           | 4.6            | 10.3  | 85.1  | 95.2               | -51.6 | 28.7  |
| CAT6_02B | 10.06          | 5.1            | 9.7   | 85.1  | 108.5              | -55.2 | 28.9  |
| CAT6_03C | 10.09          | 4.9            | 10.3  | 84.8  | 102.0              | -51.6 | 26.9  |
| CAT6_04B | 9.87           | 4.3            | 11.1  | 84.6  | 86.5               | -46.1 | 25.2  |
| CAT6_05A | 10.18          | 4.7            | 11.1  | 84.3  | 96.5               | -46.3 | 22.8  |
| CAT6_06B | 10.03          | 4.6            | 10.6  | 84.8  | 95.2               | -49.4 | 26.3  |
| CAT6_07B | 9.84           | 4.9            | 9.9   | 85.2  | 101.5              | -54.0 | 29.6  |
| CAT6_08A | 9.88           | 4.1            | 11.6  | 84.3  | 81.1               | -42.9 | 23.3  |
| CAT6_09B | 9.93           | 4.9            | 10.1  | 85.0  | 101.9              | -52.7 | 28.1  |
| CAT6_10B | 9.99           | 4.4            | 11.1  | 84.5  | 88.3               | -45.9 | 24.6  |
| CAT5_11A | 9.95           | 3.7            | 12.3  | 83.9  | 71.8               | -37.8 | 20.5  |
| CAT5_12A | 9.80           | 4.0            | 11.6  | 84.4  | 77.9               | -42.7 | 24.0  |
| CAT5_13A | 10.17          | 3.9            | 12.4  | 83.7  | 76.8               | -37.4 | 18.8  |
| CAT5_14A | 10.08          | 4.1            | 11.9  | 84.0  | 81.3               | -40.8 | 21.1  |
| CAT5_15B | 10.04          | 3.7            | 12.8  | 83.5  | 69.8               | -34.6 | 17.7  |
| CAT5_16A | 10.00          | 4.3            | 11.5  | 84.2  | 85.6               | -43.3 | 22.6  |
| CAT5_17B | 10.30          | 3.9            | 12.7  | 83.4  | 75.0               | -35.2 | 16.9  |
| CAT5_18B | 10.21          | 4.4            | 11.5  | 84.1  | 88.6               | -43.5 | 22.0  |
| CAT5_19A | 10.26          | 4.1            | 12.3  | 83.6  | 80.7               | -37.9 | 18.2  |
| CAT5_20A | 10.29          | 3.5            | 13.6  | 82.9  | 65.2               | -29.5 | 13.6  |

Table S9. Join Count Analysis Of Fluorine EDS Maps (Cathode DoE, Calendered)

| Fluorine | Coverage       | Experiment / % |       |       | Join Count Z Score |       |       |
|----------|----------------|----------------|-------|-------|--------------------|-------|-------|
|          | Proportion / % | 1 – 1          | 0 – 1 | 0 - 0 | 1 – 1              | 0 – 1 | 0 – 0 |
| CAT6_01A | 10.04          | 2.7            | 14.6  | 82.7  | 45.2               | -22.9 | 12.0  |
| CAT6_02B | 10.06          | 2.5            | 15.1  | 82.4  | 39.8               | -19.5 | 9.8   |
| CAT6_03C | 10.27          | 2.8            | 14.8  | 82.3  | 48.3               | -21.4 | 9.5   |
| CAT6_04B | 9.88           | 2.4            | 15.0  | 82.6  | 36.8               | -20.2 | 11.3  |
| CAT6_05A | 9.86           | 2.4            | 15.0  | 82.6  | 36.1               | -20.0 | 11.3  |
| CAT6_06B | 9.89           | 2.6            | 14.7  | 82.8  | 40.7               | -22.4 | 12.6  |
| CAT6_07B | 9.97           | 2.8            | 14.4  | 82.8  | 46.1               | -24.0 | 12.9  |
| CAT6_08A | 9.96           | 2.5            | 15.0  | 82.6  | 38.5               | -20.4 | 11.1  |
| CAT6_09B | 9.78           | 2.6            | 14.5  | 82.9  | 41.6               | -23.4 | 13.4  |
| CAT6_10B | 9.87           | 2.5            | 14.8  | 82.8  | 38.9               | -21.7 | 12.4  |
| CAT5_11A | 9.96           | 2.6            | 14.8  | 82.6  | 40.6               | -21.3 | 11.5  |
| CAT5_12A | 9.95           | 2.5            | 14.9  | 82.6  | 38.9               | -20.5 | 11.1  |
| CAT5_13A | 9.94           | 2.3            | 15.3  | 82.4  | 33.2               | -17.8 | 9.8   |
| CAT5_14A | 10.07          | 2.2            | 15.7  | 82.1  | 31.7               | -15.2 | 7.5   |
| CAT5_15B | 9.99           | 2.3            | 15.4  | 82.3  | 35.3               | -17.7 | 9.1   |
| CAT5_16A | 9.99           | 2.3            | 15.5  | 82.3  | 33.3               | -17.0 | 8.9   |
| CAT5_17B | 10.07          | 2.3            | 15.7  | 82.1  | 33.0               | -15.5 | 7.5   |
| CAT5_18B | 10.03          | 2.4            | 15.2  | 82.4  | 37.2               | -18.8 | 9.8   |
| CAT5_19A | 9.96           | 2.4            | 15.2  | 82.4  | 36.1               | -18.8 | 10.1  |
| CAT5_20A | 9.86           | 2.5            | 14.8  | 82.7  | 38.6               | -21.4 | 12.1  |

Table S10. Moran Analysis Of EDS Maps For Cathode DoE (Calendered)

| Sample   | Carbon    |      |       | Fluorine  |      |       |
|----------|-----------|------|-------|-----------|------|-------|
|          | Threshold | Mean | Moran | Threshold | Mean | Moran |
| CAT6_01A | 40        | 12.9 | 0.604 | 31        | 8.3  | 0.384 |
| CAT6_02B | 64        | 22.5 | 0.642 | 49        | 13.6 | 0.364 |
| CAT6_03C | 56        | 19.2 | 0.629 | 25        | 7.1  | 0.402 |
| CAT6_04B | 37        | 12.5 | 0.542 | 44        | 11.7 | 0.350 |
| CAT6_05A | 23        | 7.5  | 0.565 | 48        | 12.9 | 0.349 |
| CAT6_06B | 40        | 13.1 | 0.579 | 48        | 12.8 | 0.376 |
| CAT6_07B | 47        | 15.5 | 0.615 | 50        | 13.5 | 0.400 |
| CAT6_08A | 42        | 14.2 | 0.535 | 50        | 13.7 | 0.362 |
| CAT6_09B | 60        | 20.8 | 0.623 | 27        | 7.7  | 0.384 |
| CAT6_10B | 36        | 11.9 | 0.577 | 46        | 12.1 | 0.365 |
| CAT5_11A | 55        | 16.4 | 0.537 | 37        | 9.6  | 0.349 |
| CAT5_12A | 34        | 10.7 | 0.516 | 38        | 9.9  | 0.340 |
| CAT5_13A | 39        | 13.4 | 0.488 | 47        | 12.8 | 0.333 |
| CAT5_14A | 36        | 11.9 | 0.519 | 43        | 11.7 | 0.319 |
| CAT5_15B | 31        | 9.7  | 0.496 | 42        | 11.2 | 0.337 |
| CAT5_16A | 43        | 14.9 | 0.528 | 50        | 13.9 | 0.335 |
| CAT5_17B | 33        | 10.6 | 0.486 | 43        | 11.8 | 0.317 |
| CAT5_18B | 36        | 11.8 | 0.541 | 44        | 11.8 | 0.347 |
| CAT5_19A | 31        | 9.6  | 0.530 | 36        | 9.3  | 0.318 |
| CAT5_20A | 22        | 6.0  | 0.500 | 31        | 8.1  | 0.321 |

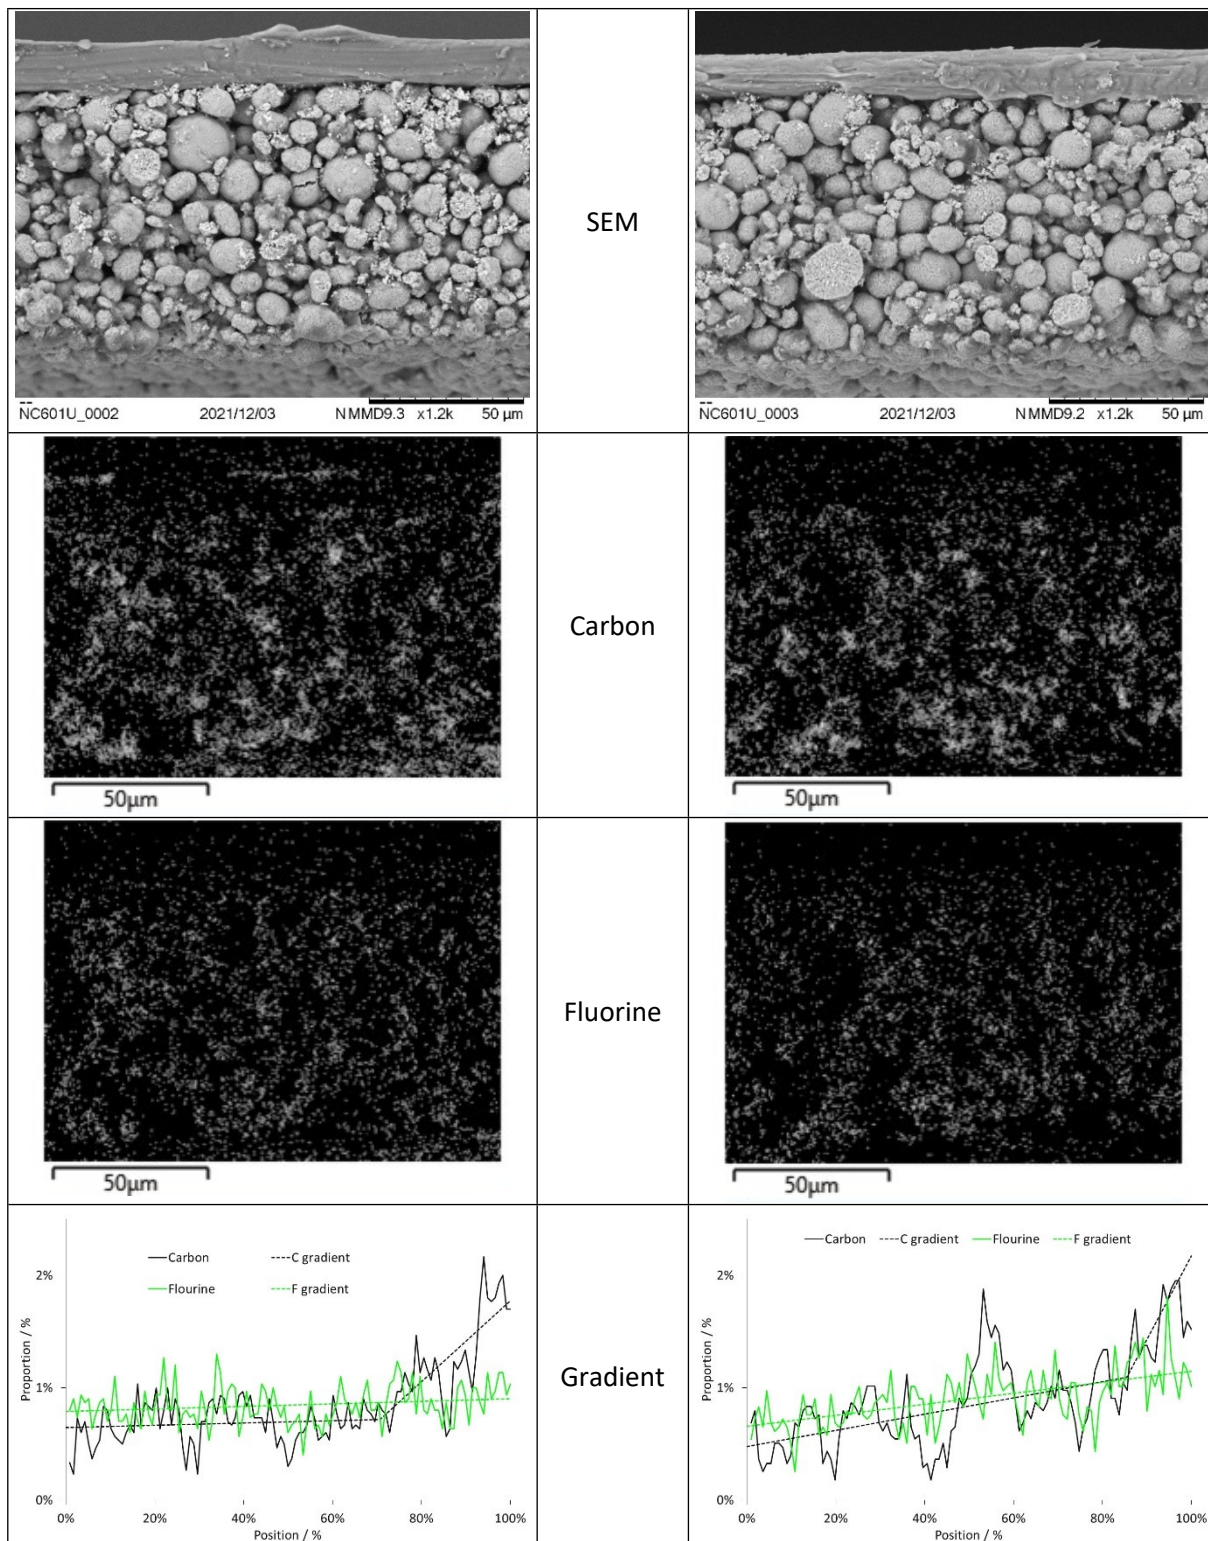

Figure S1. SEM Images And EDS Maps (601UA And 601UB)

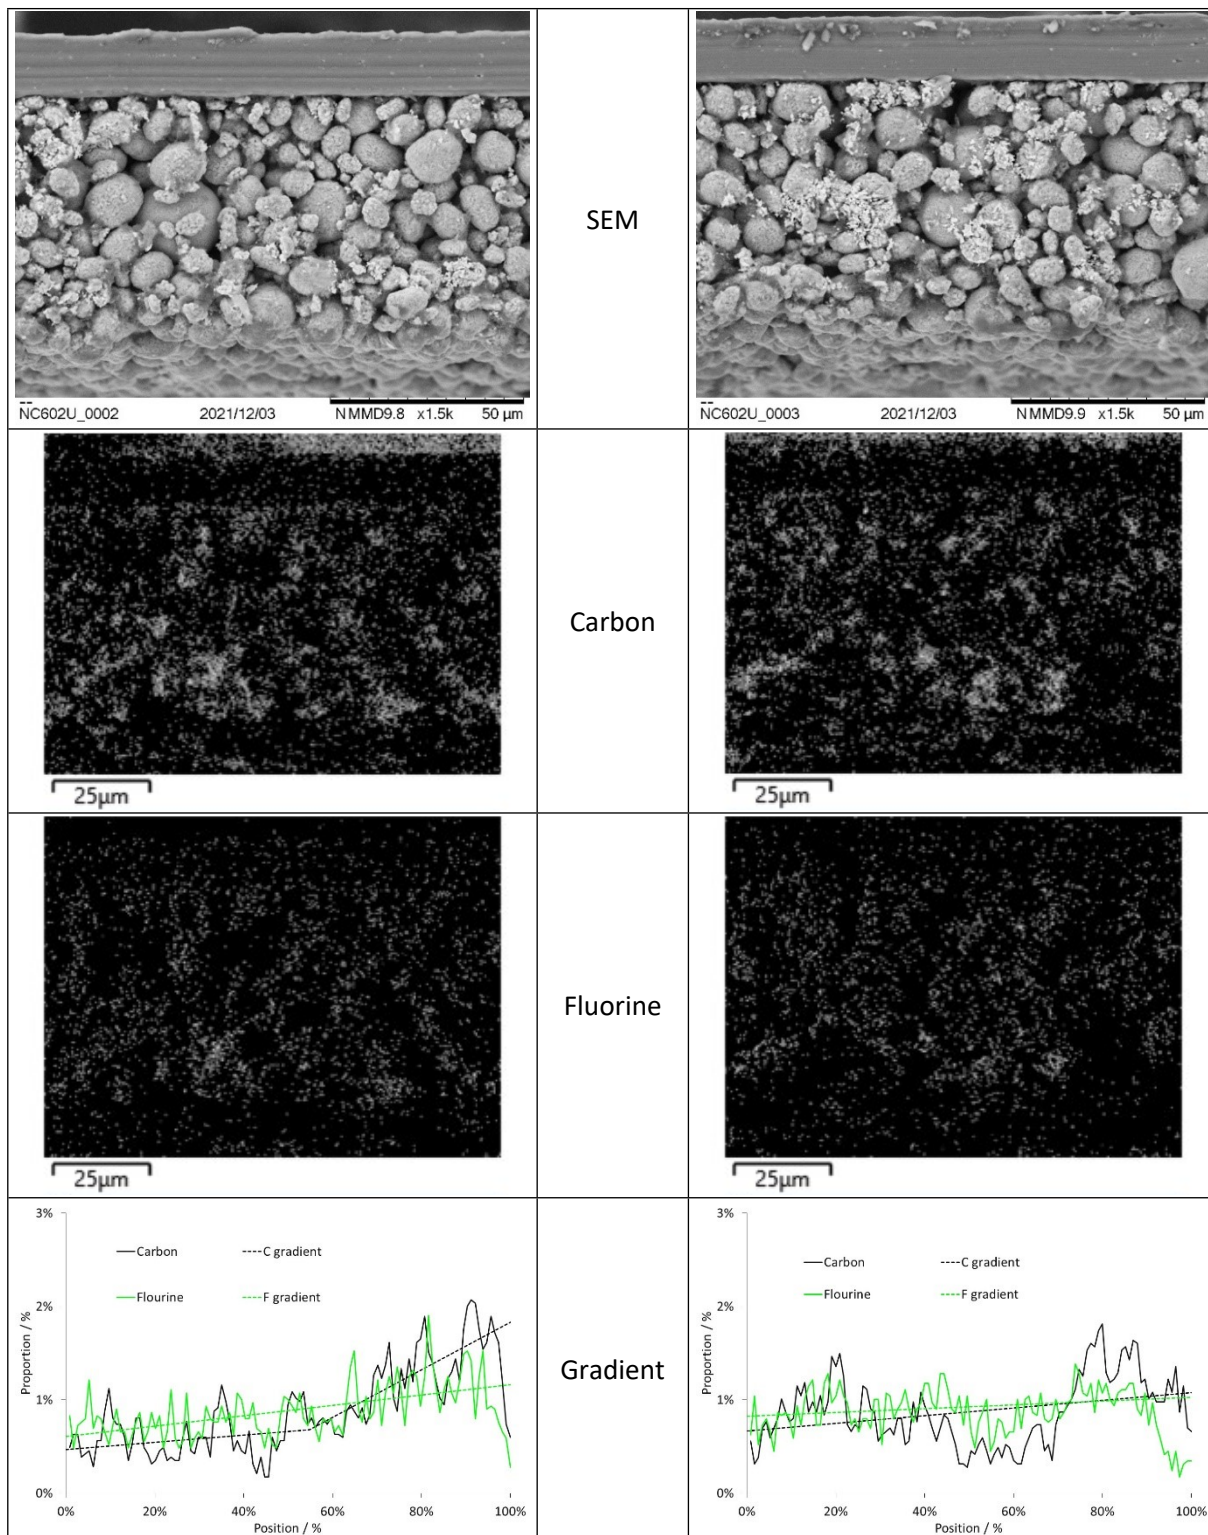

Figure S2. SEM Images And EDS Maps (602UA And 602UB)



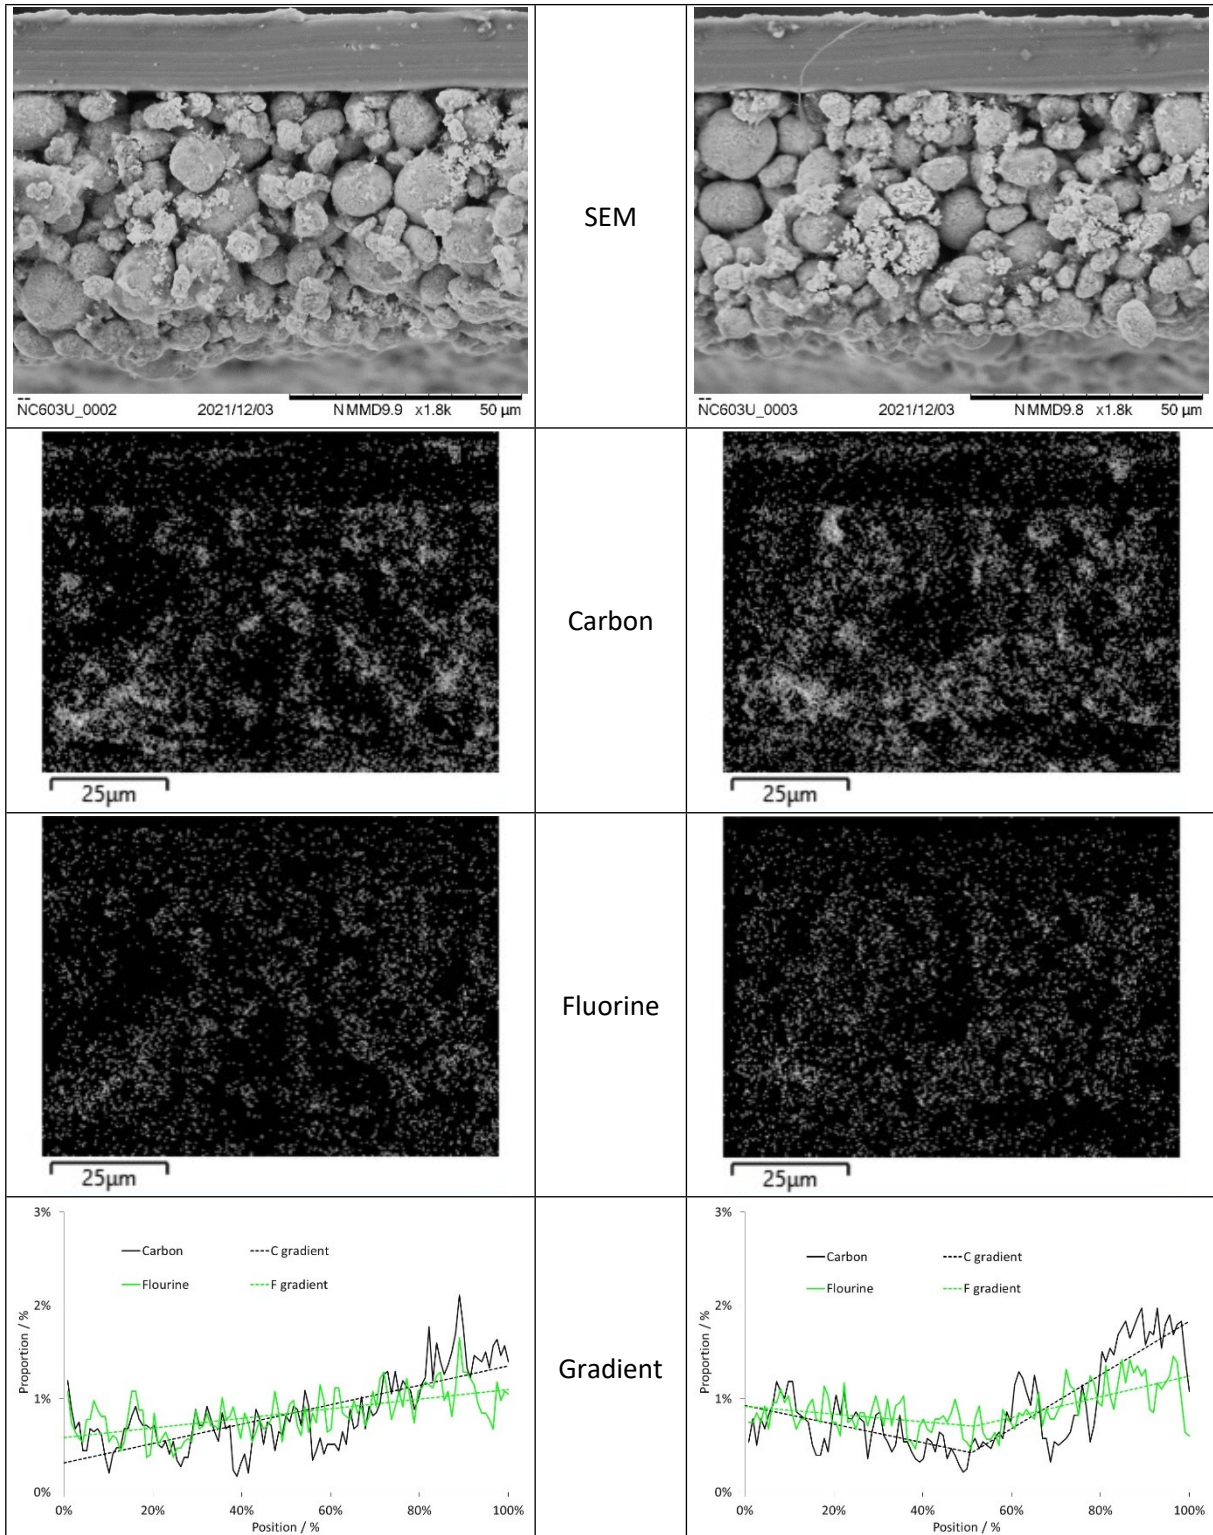

Figure S3. SEM Images And EDS Maps (603UA And 603UB)

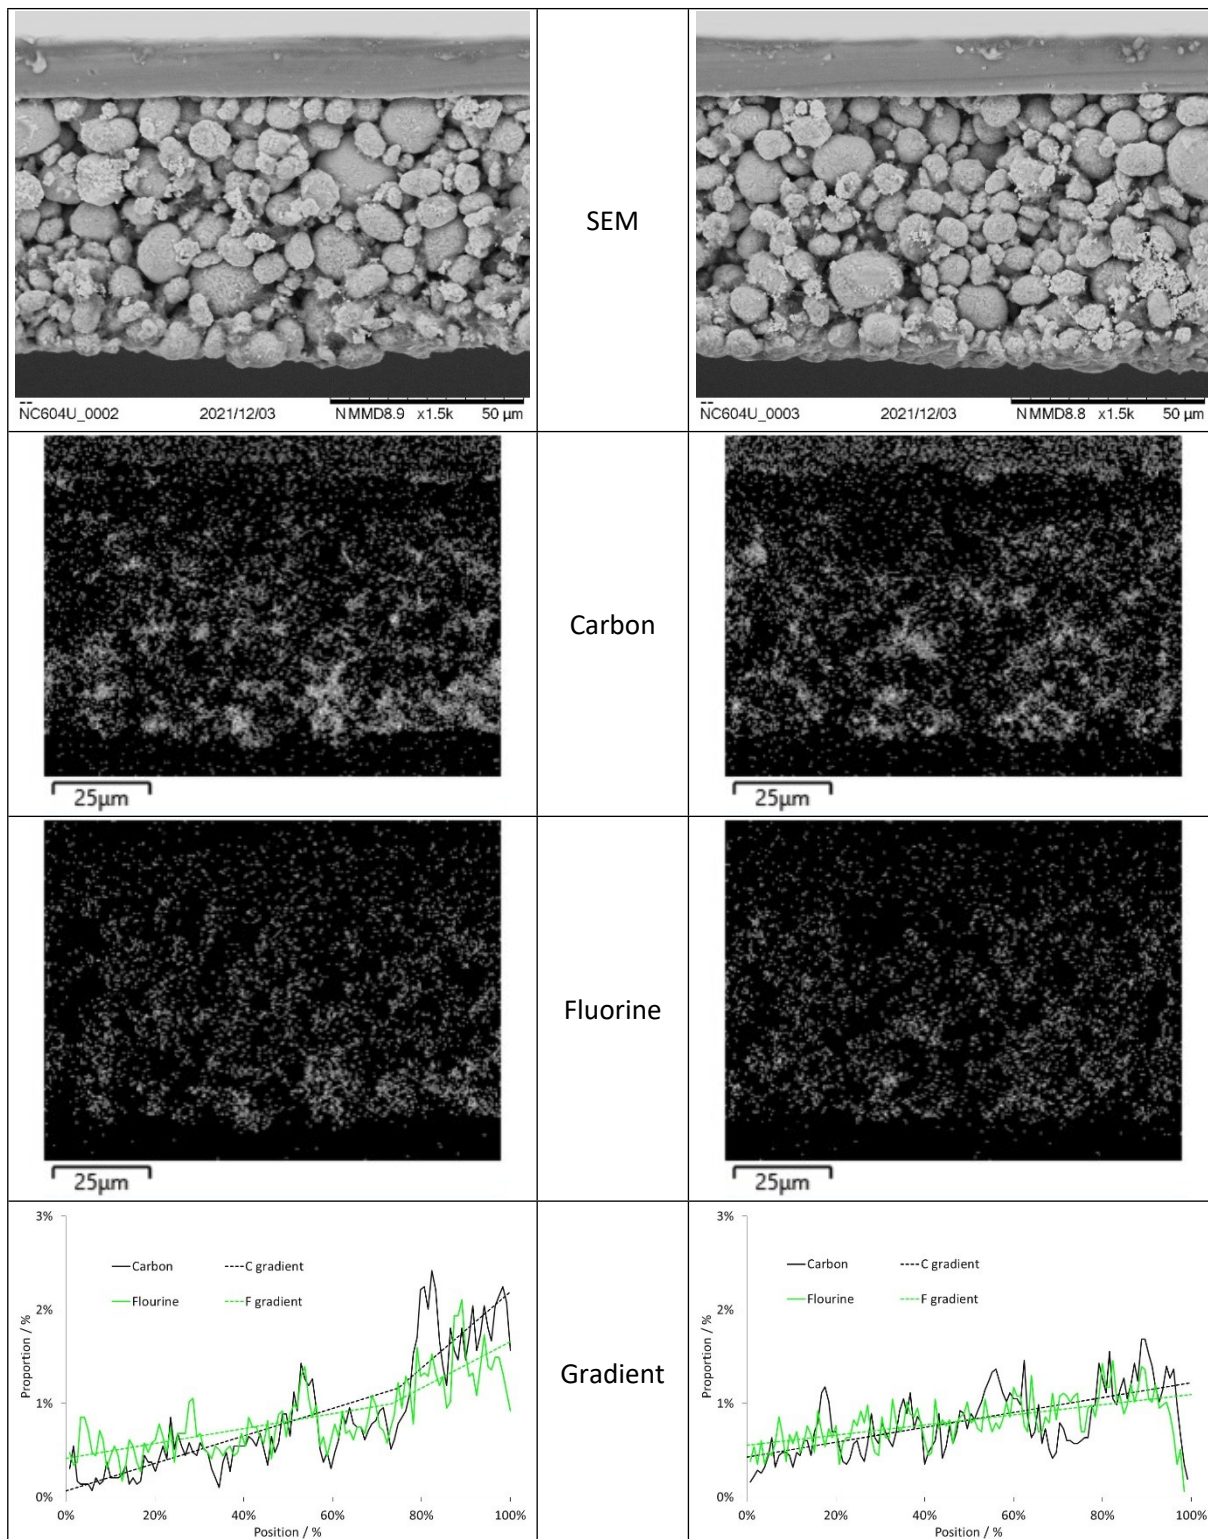

Figure S4. SEM Images And EDS Maps (604UA And 604UB)



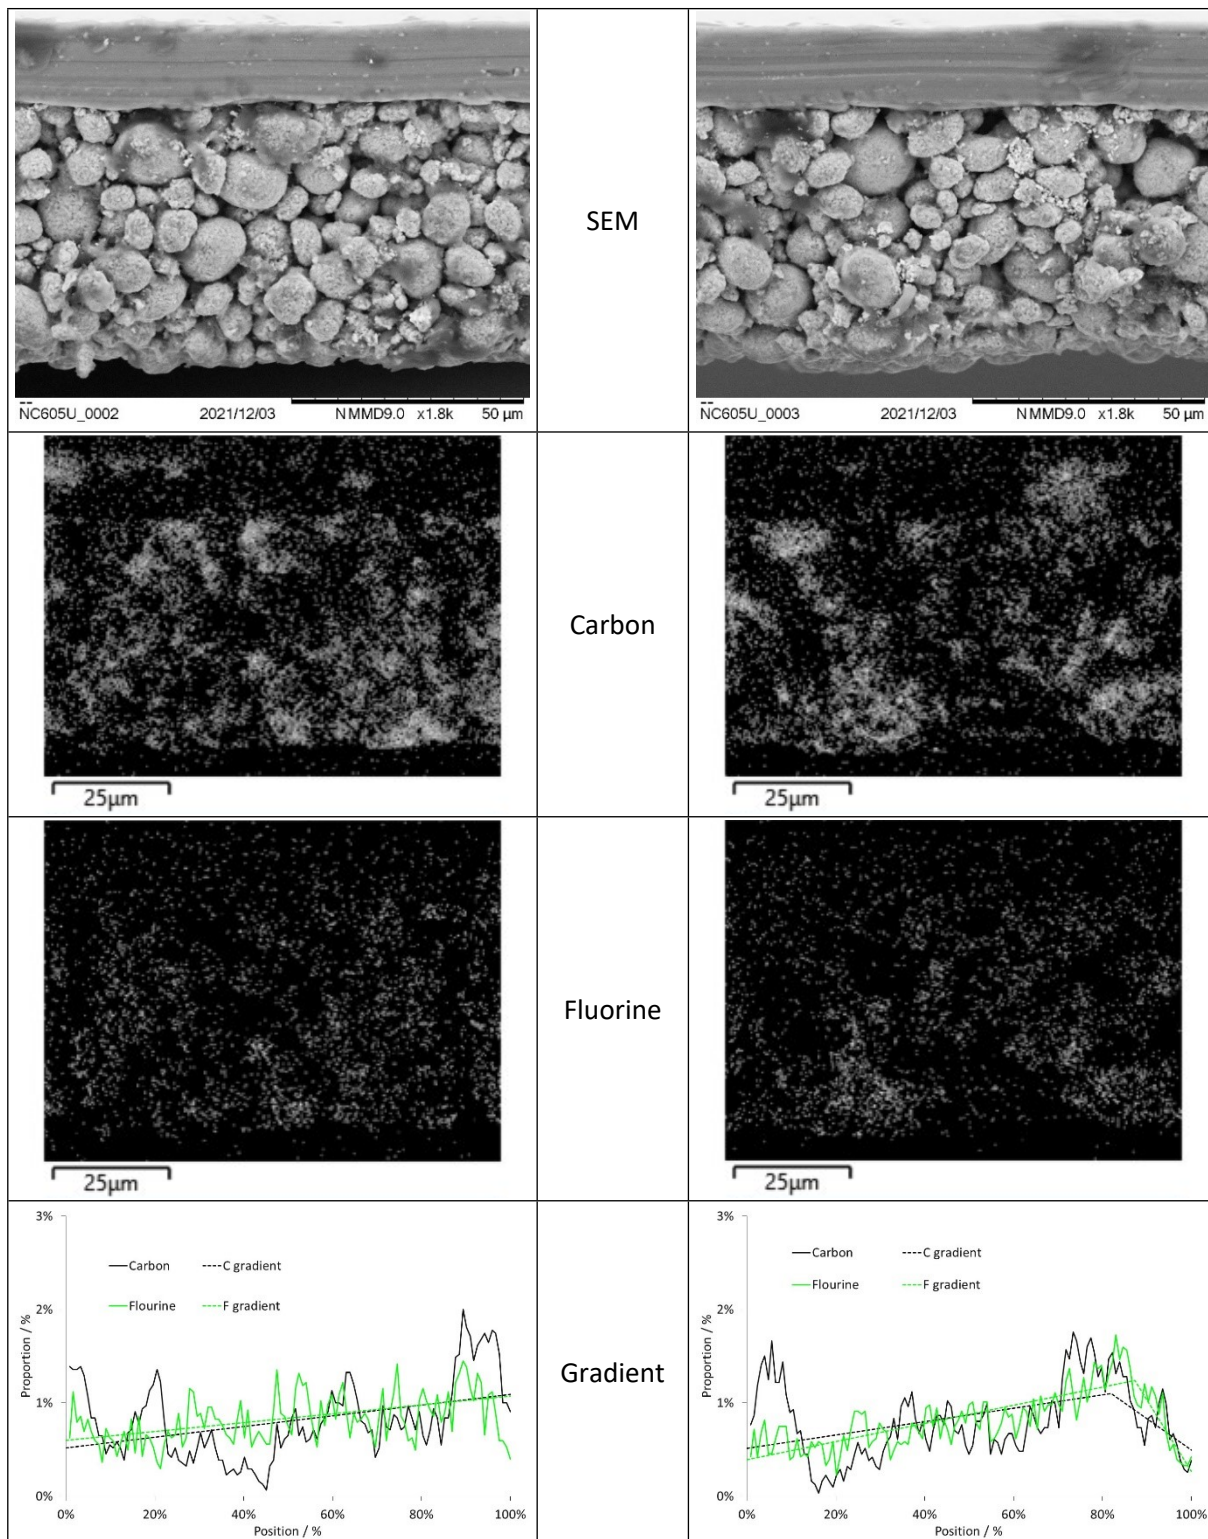

Figure S5. SEM Images And EDS Maps (605UA And 605UB)

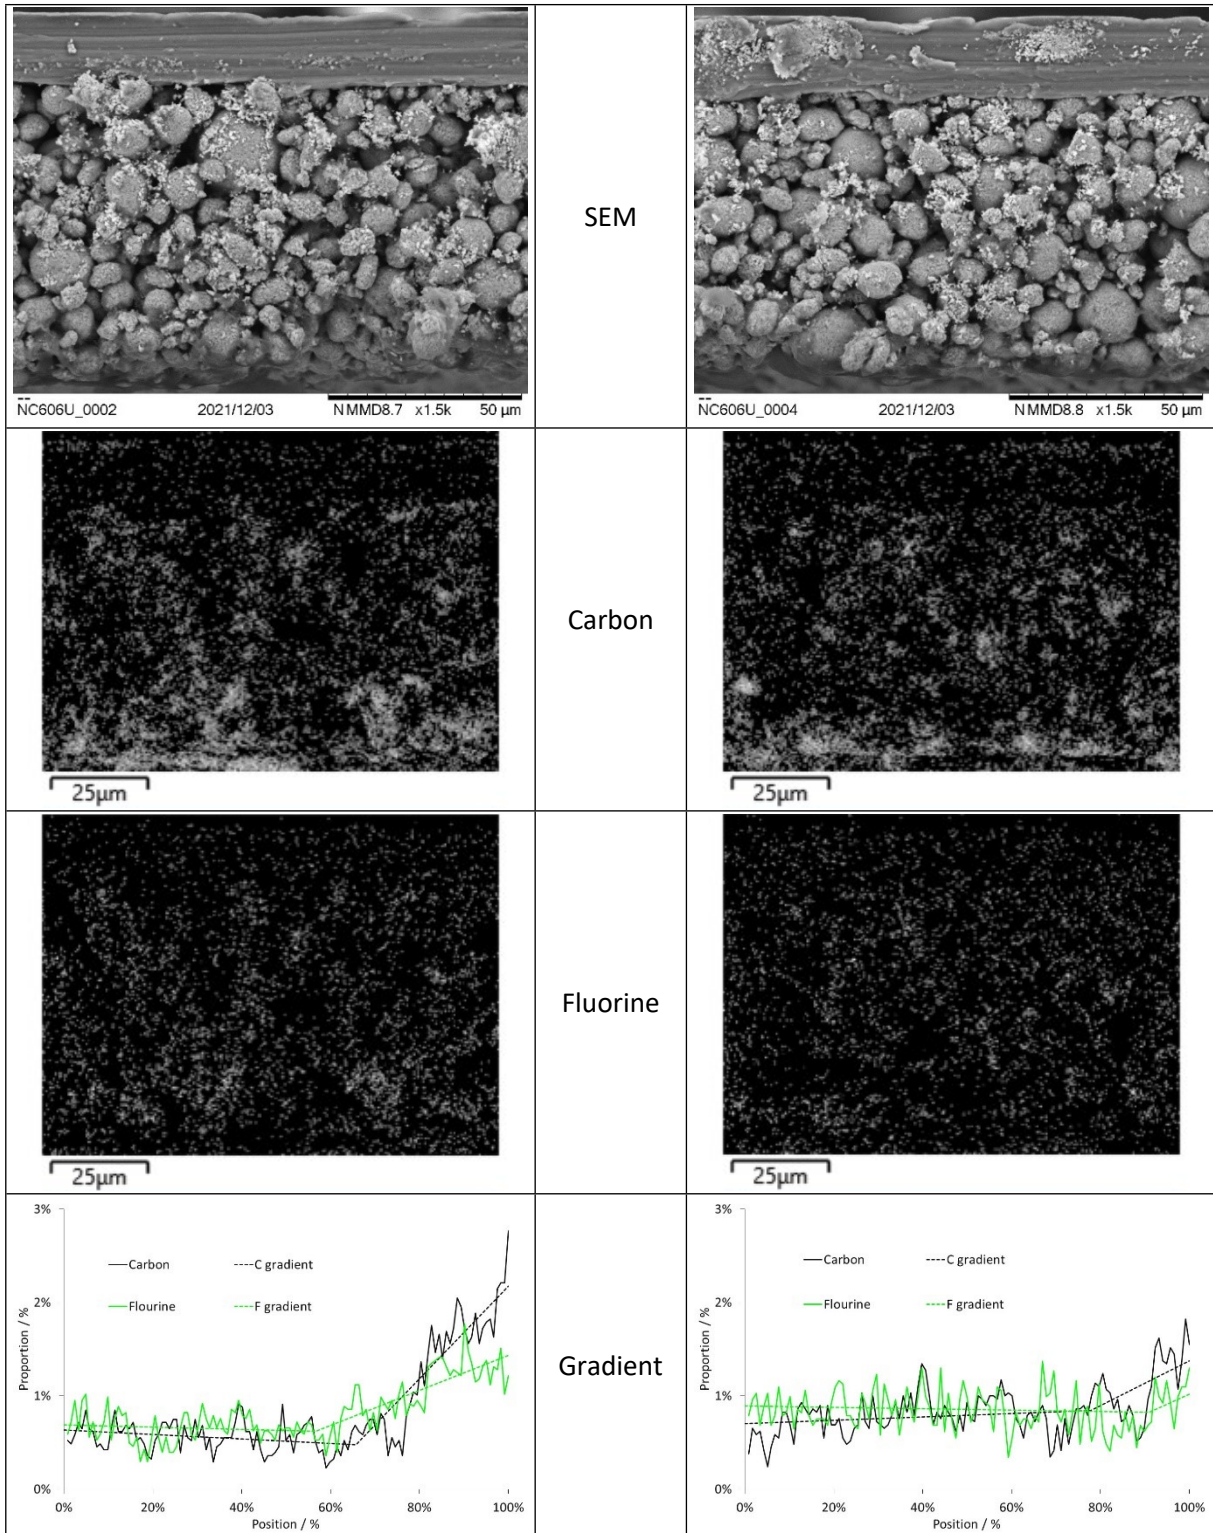

Figure S6. SEM Images And EDS Maps (606UA And 606UB)



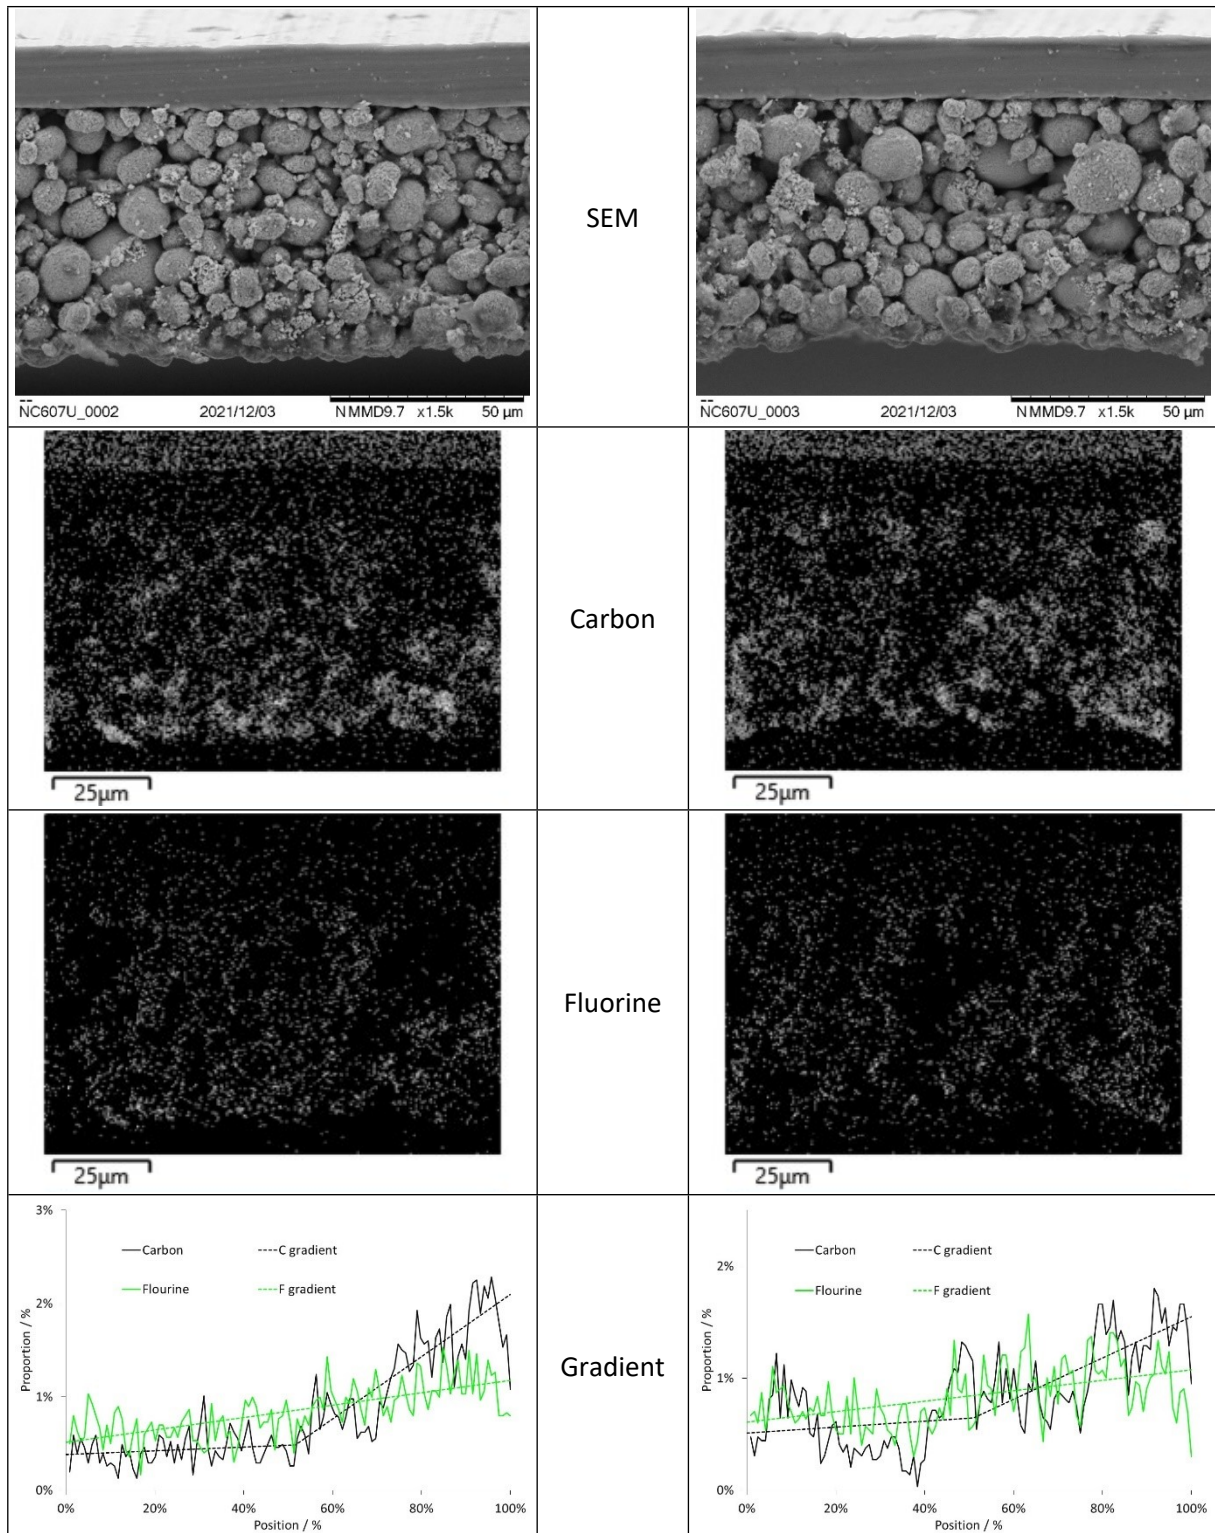

Figure S7. SEM Images And EDS Maps (607UA And 607UB)

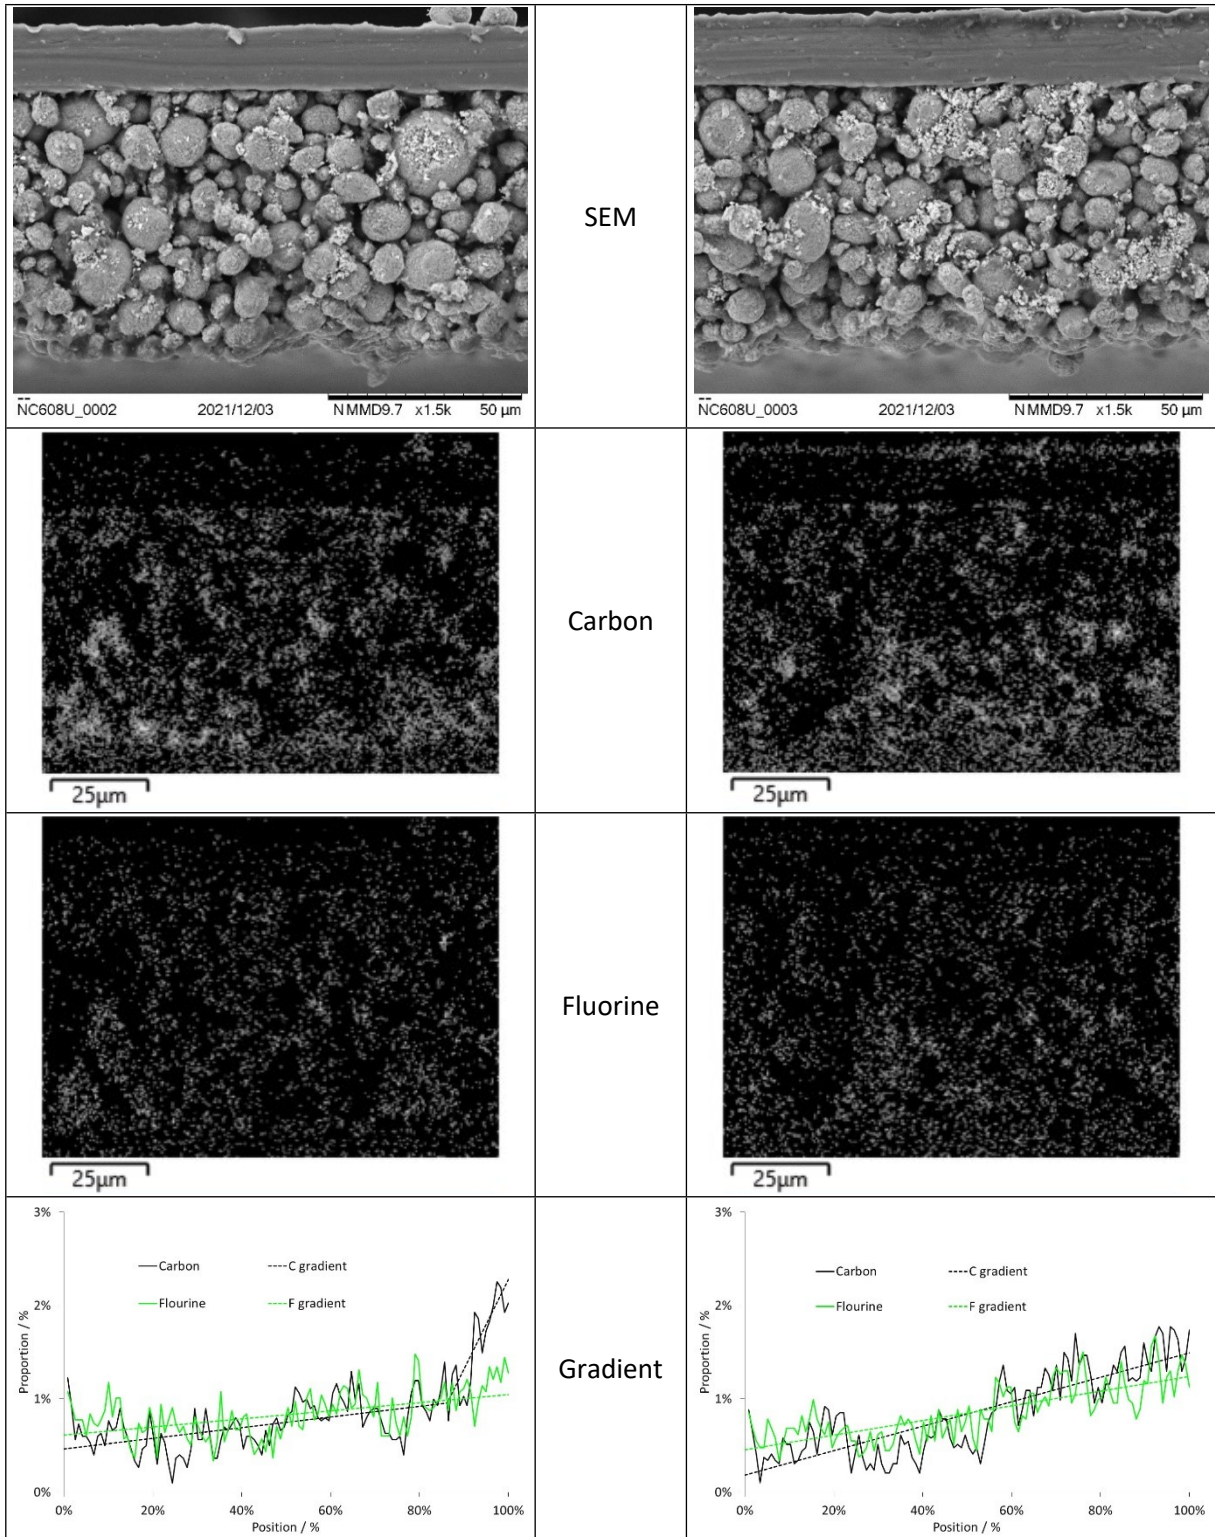

Figure S8. SEM Images And EDS Maps (608UA And 608UB)



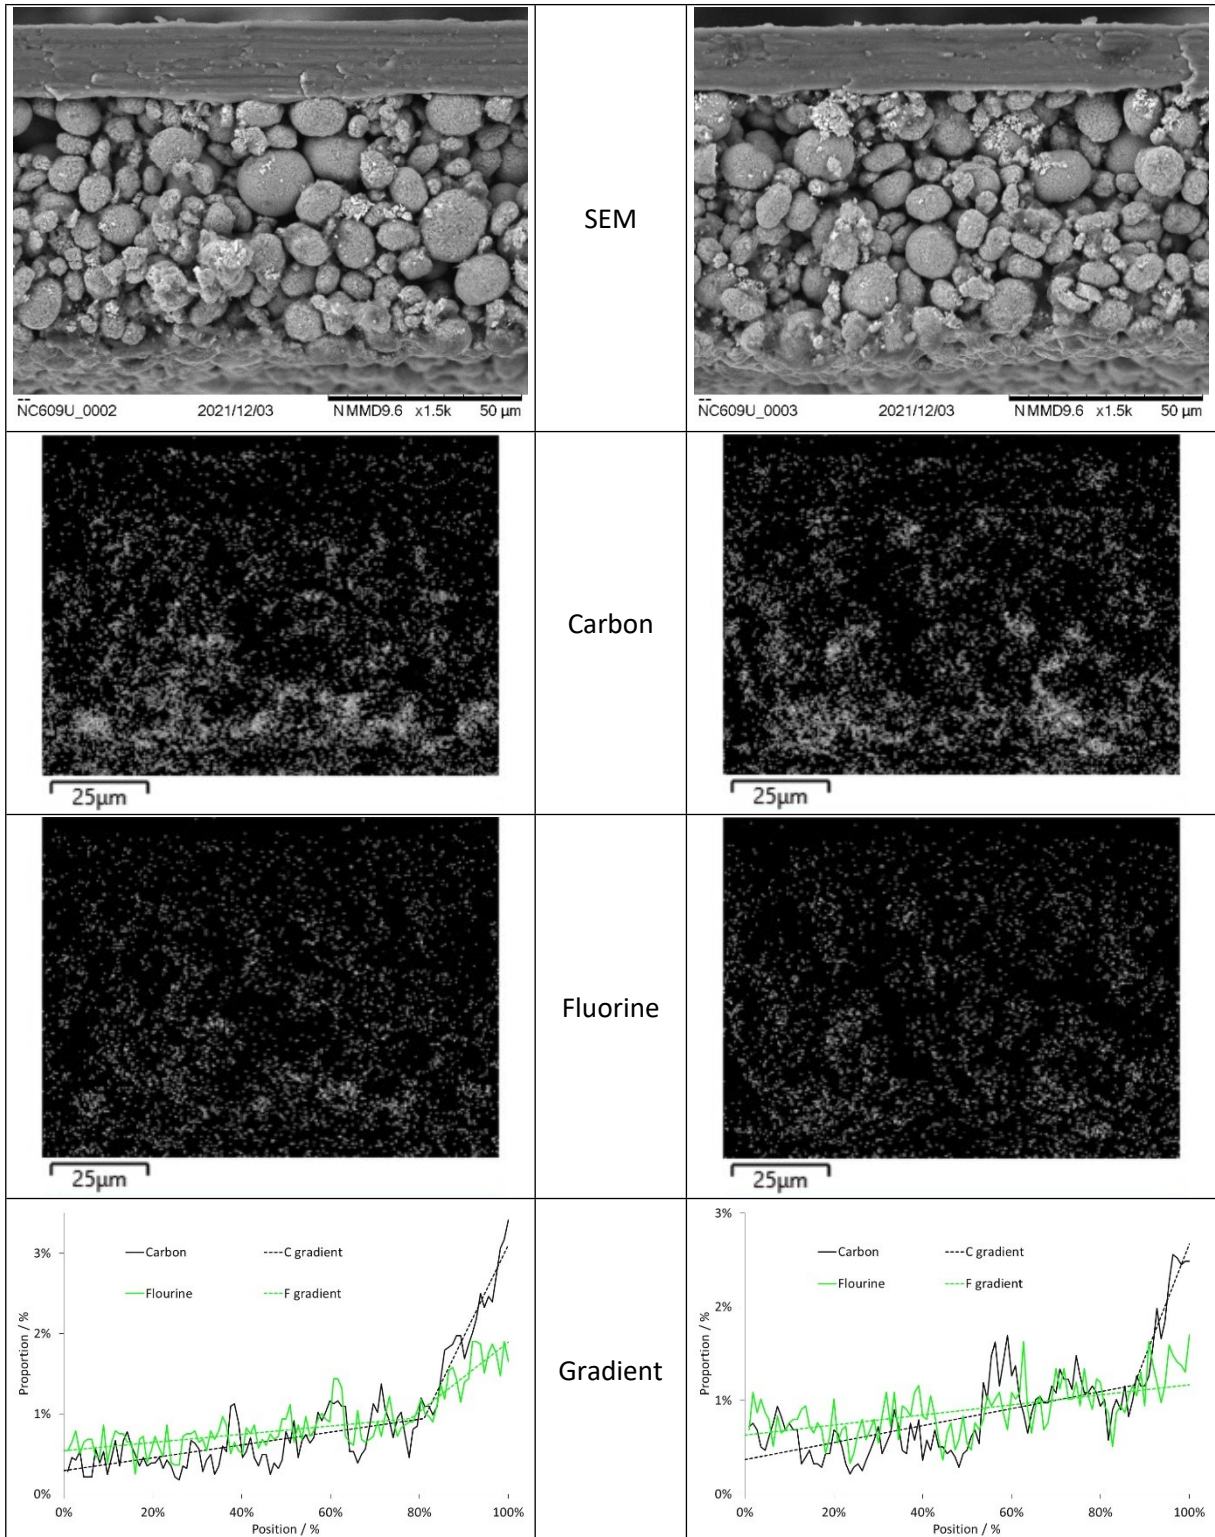

Figure S9. SEM Images And EDS Maps (609UA And 609UB)

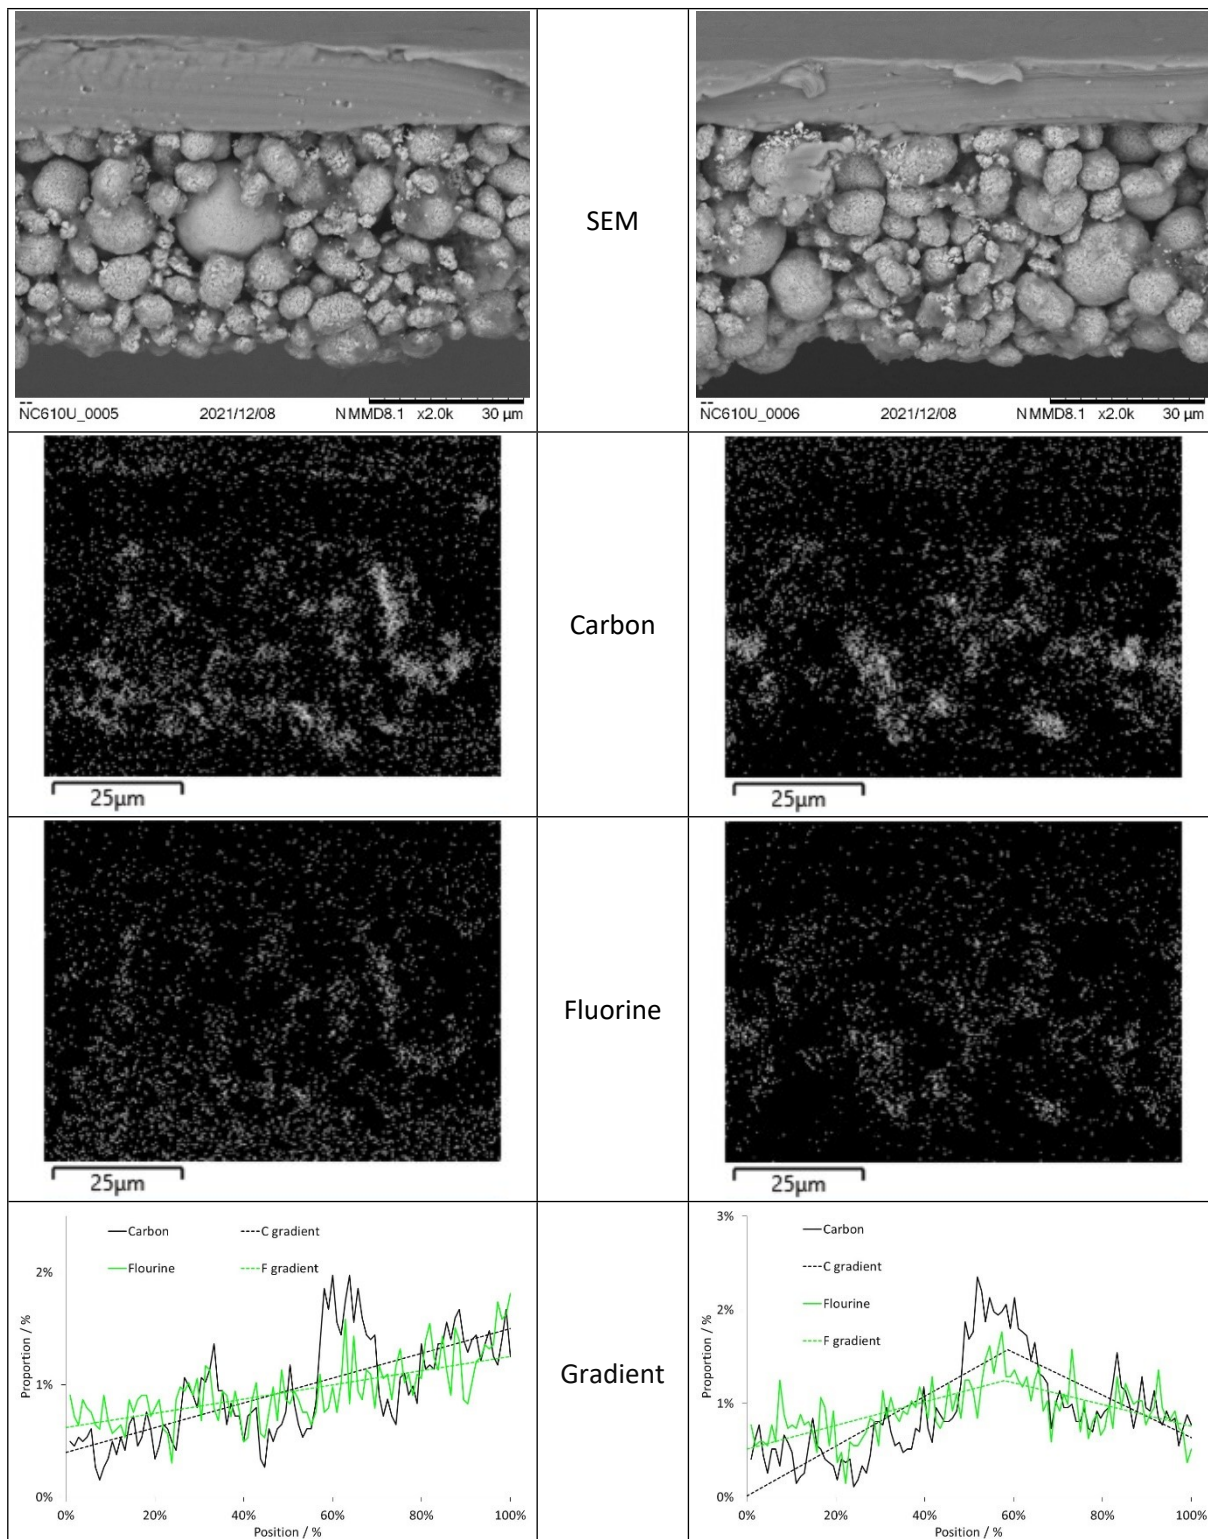

Figure S10. SEM Images And EDS Maps (610UA And 610UB repeat)



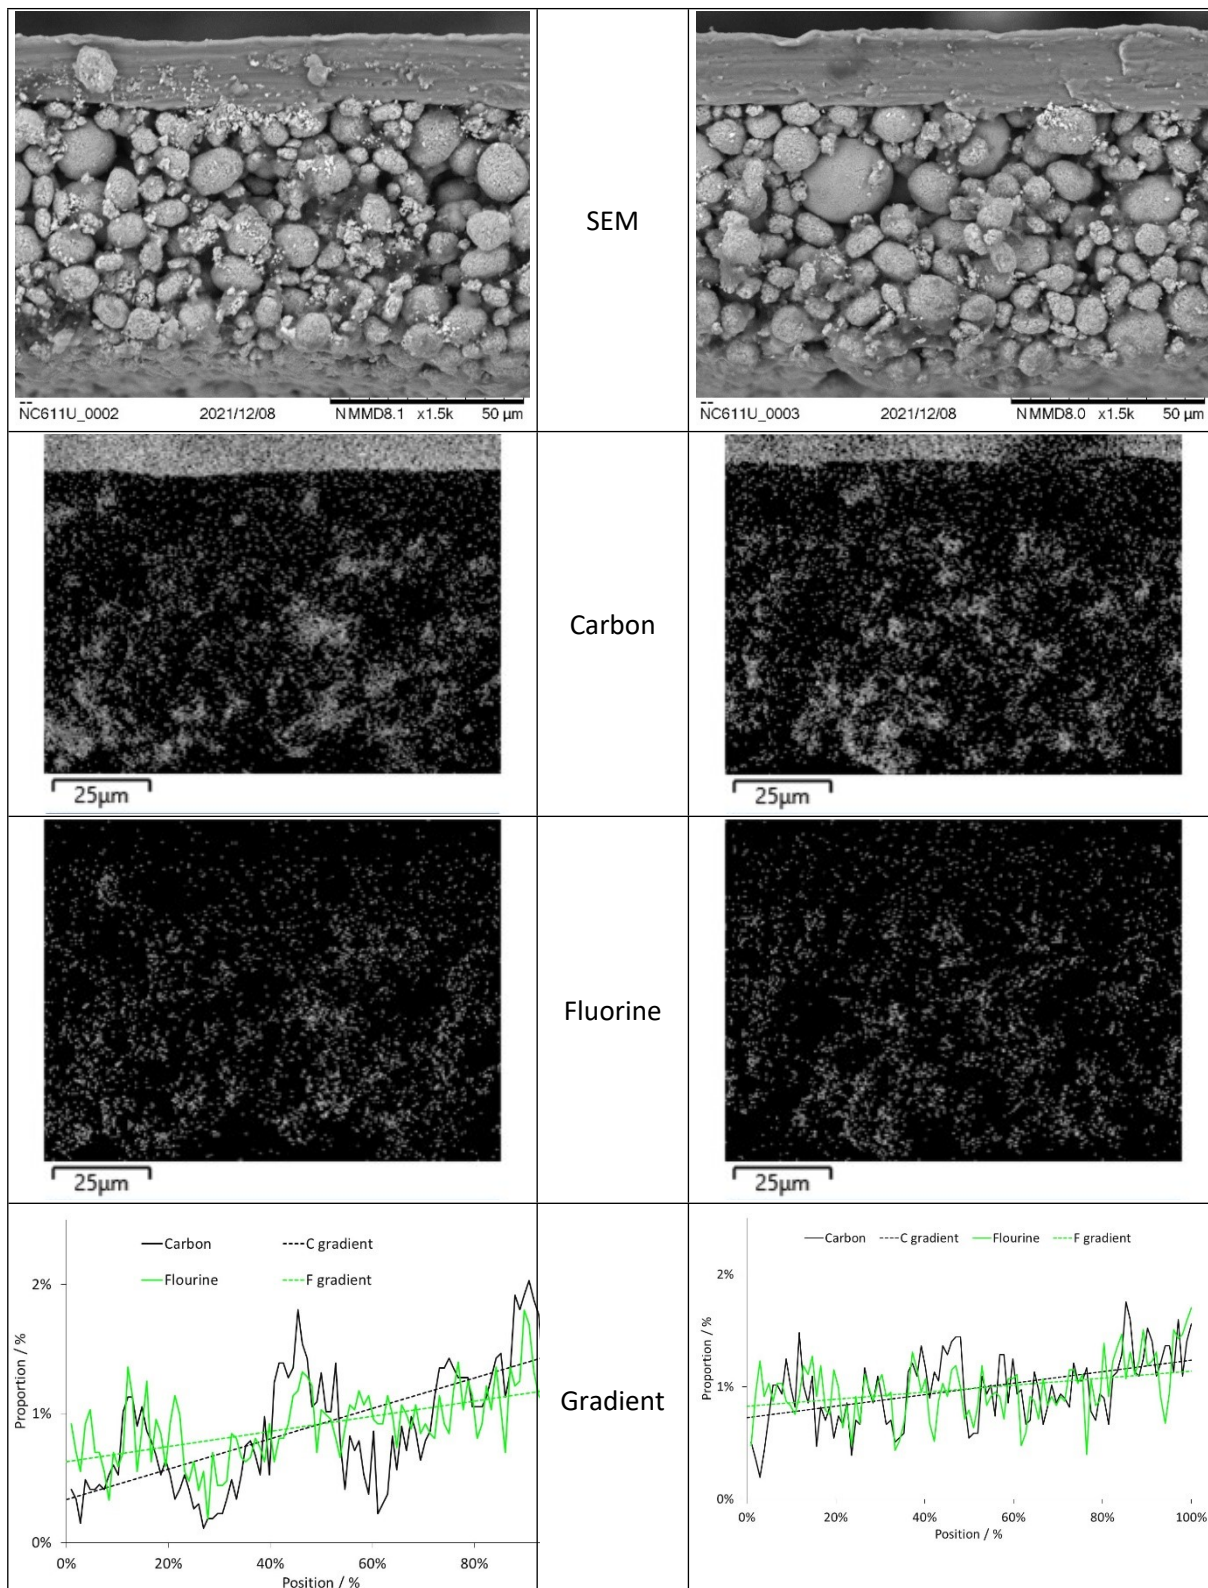

Figure S11. SEM Images And EDS Maps (611UA And 611UB)

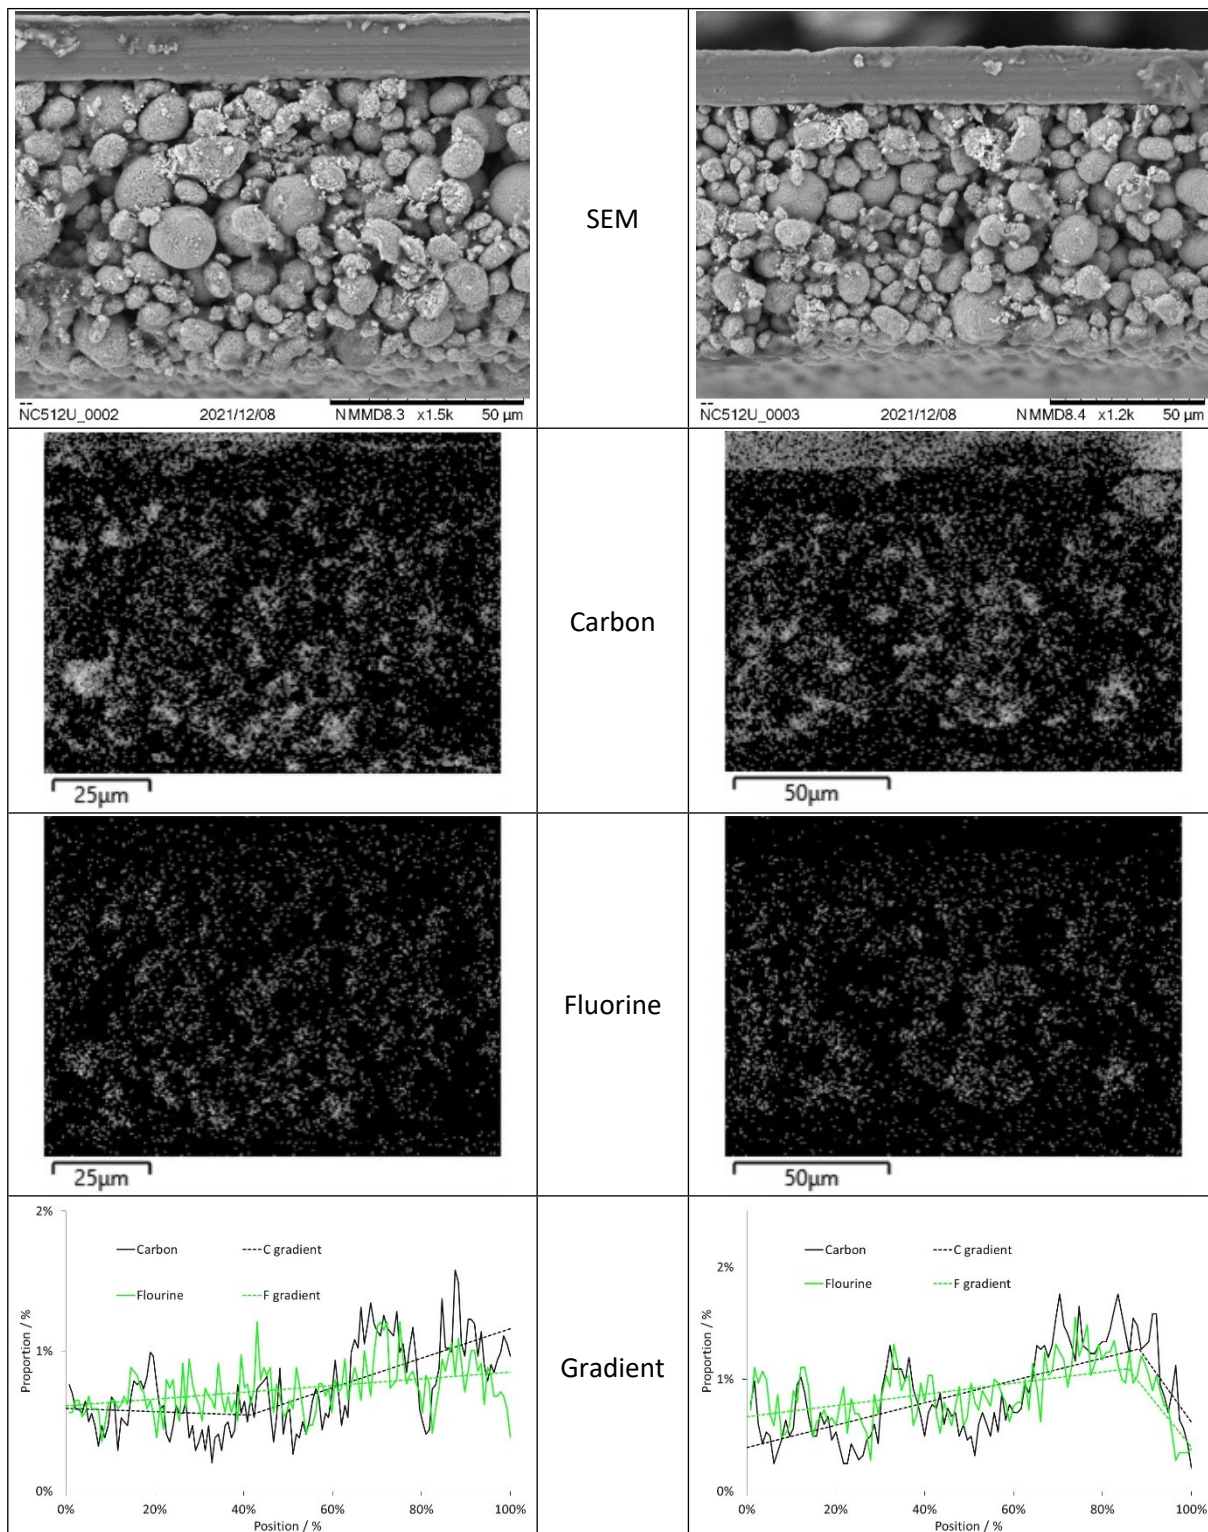

Figure S12. SEM Images And EDS Maps (512UA And 512UB)



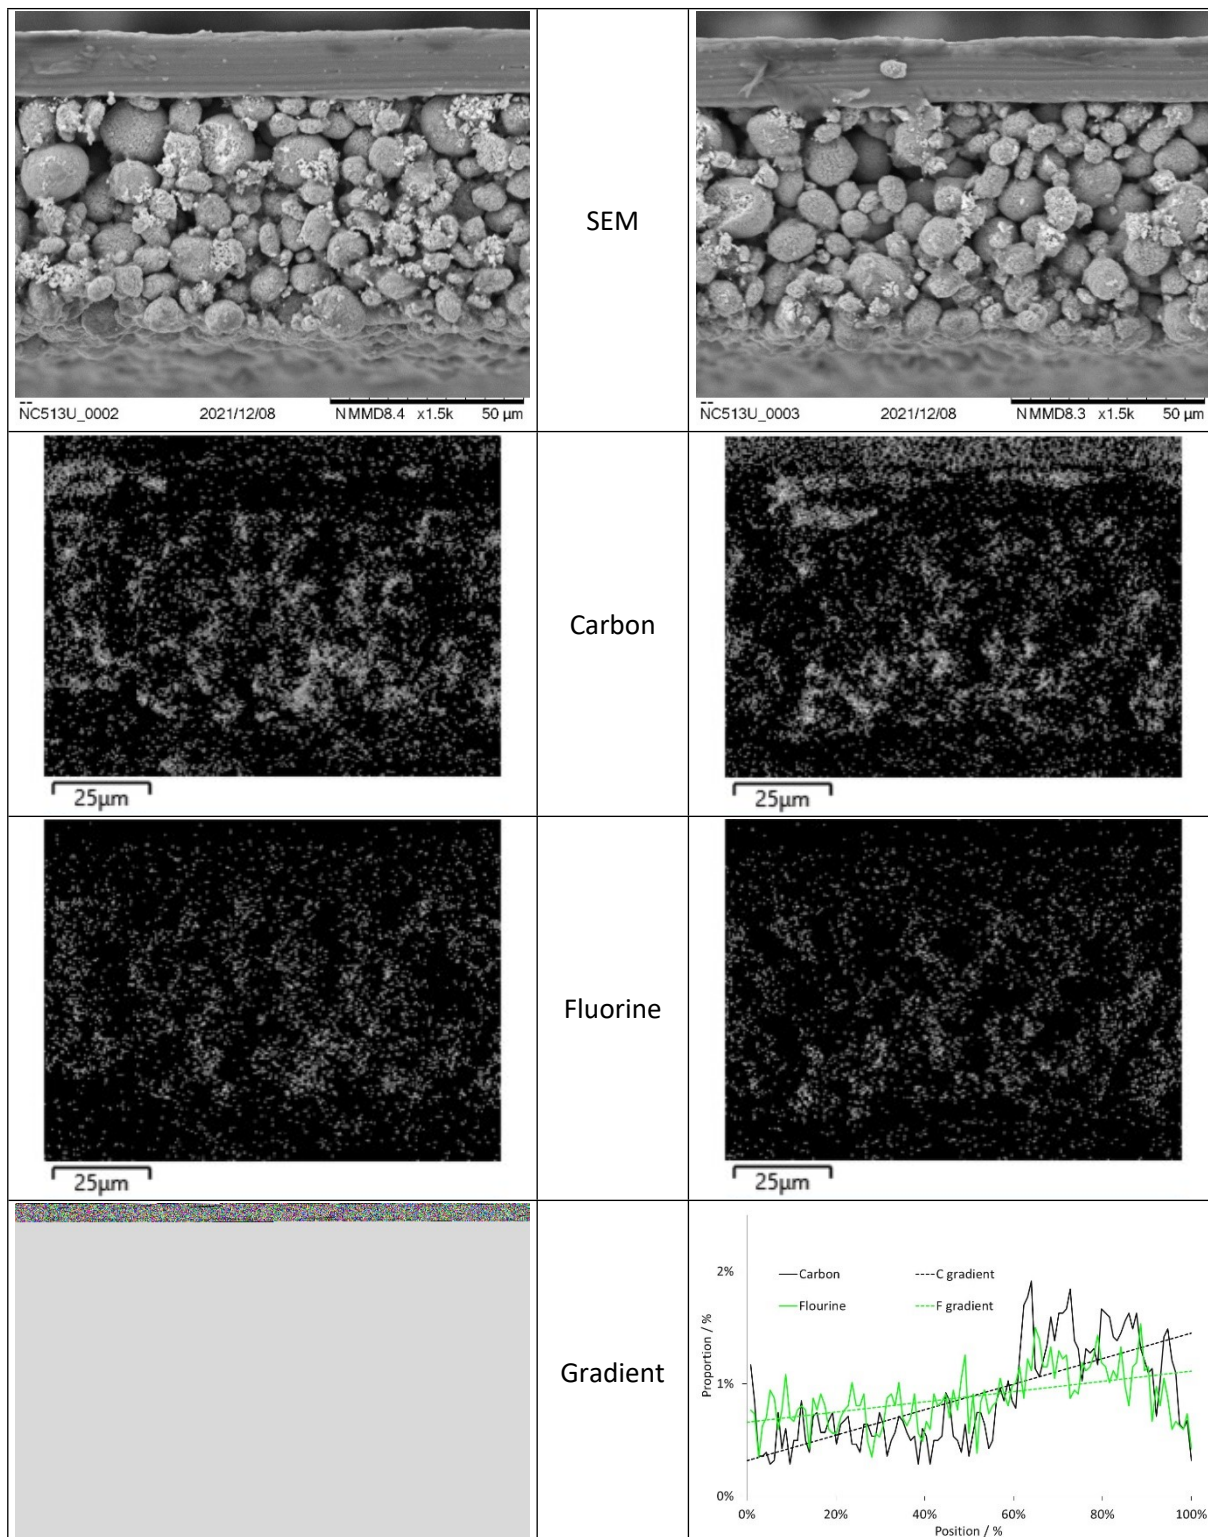

Figure S13. SEM Images And EDS Maps (513UA And 513UB)

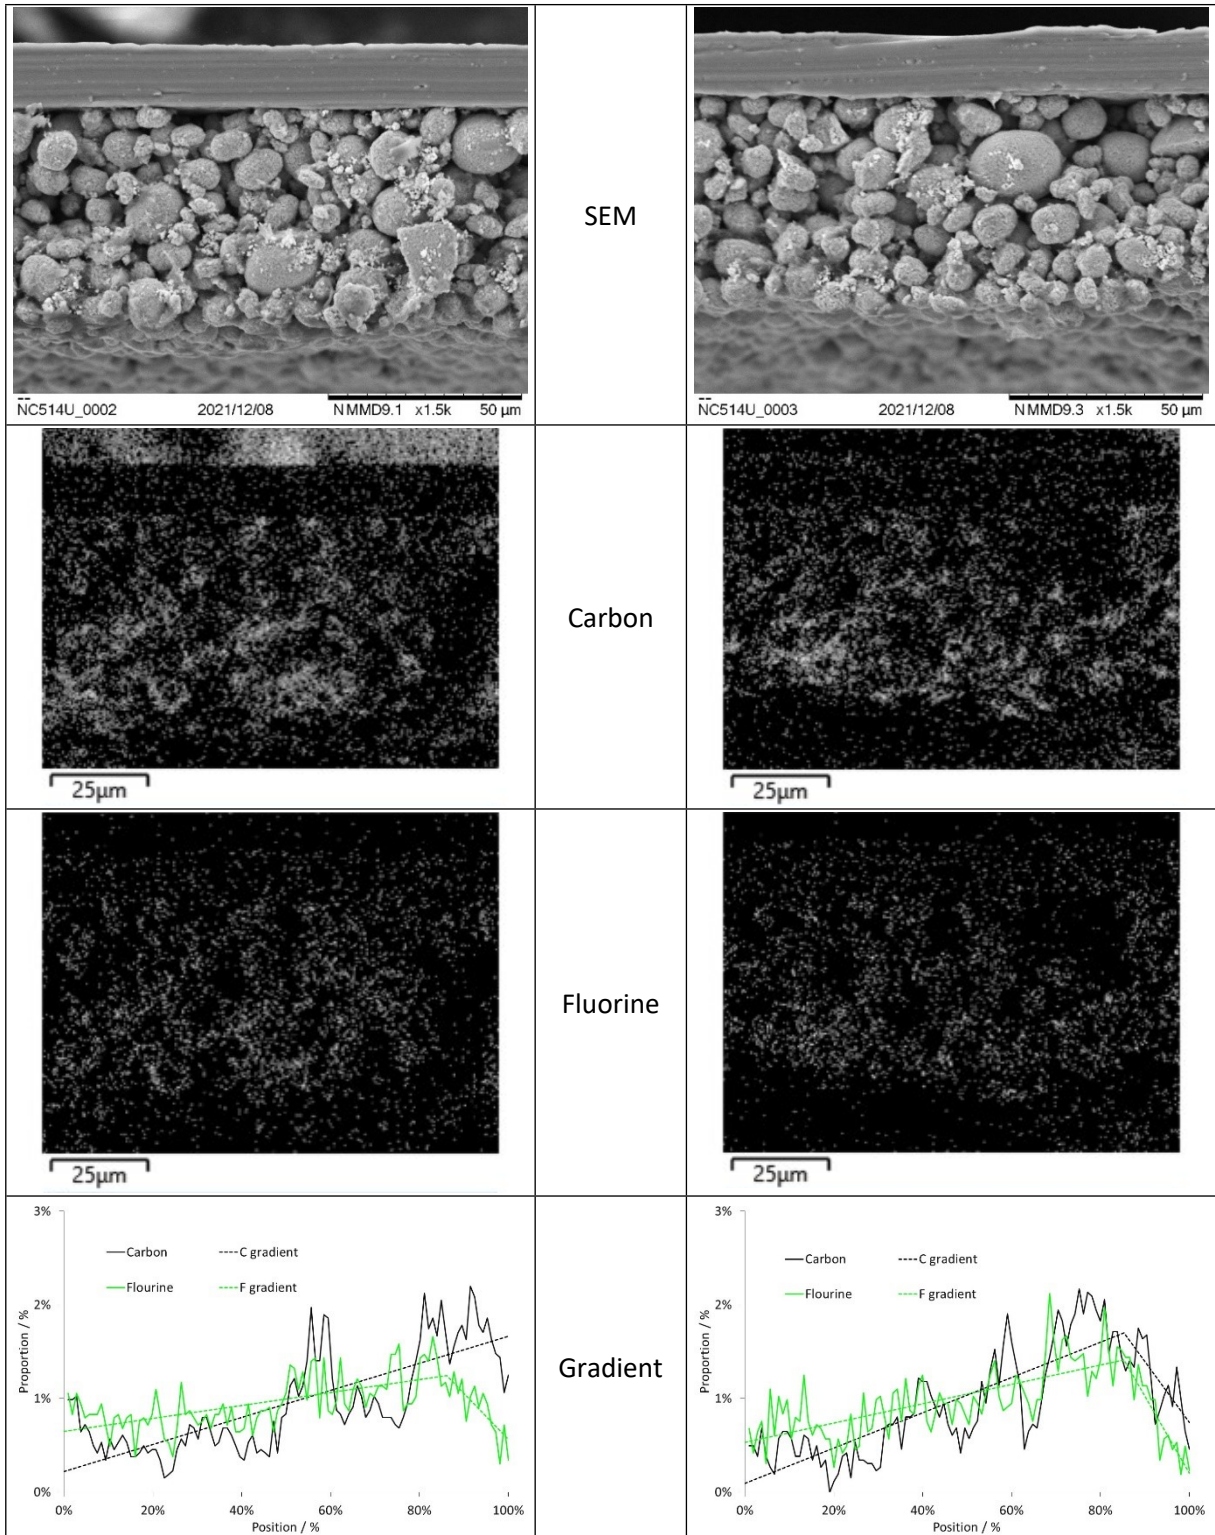

Figure S14. SEM Images And EDS Maps (514UA And 514UB)



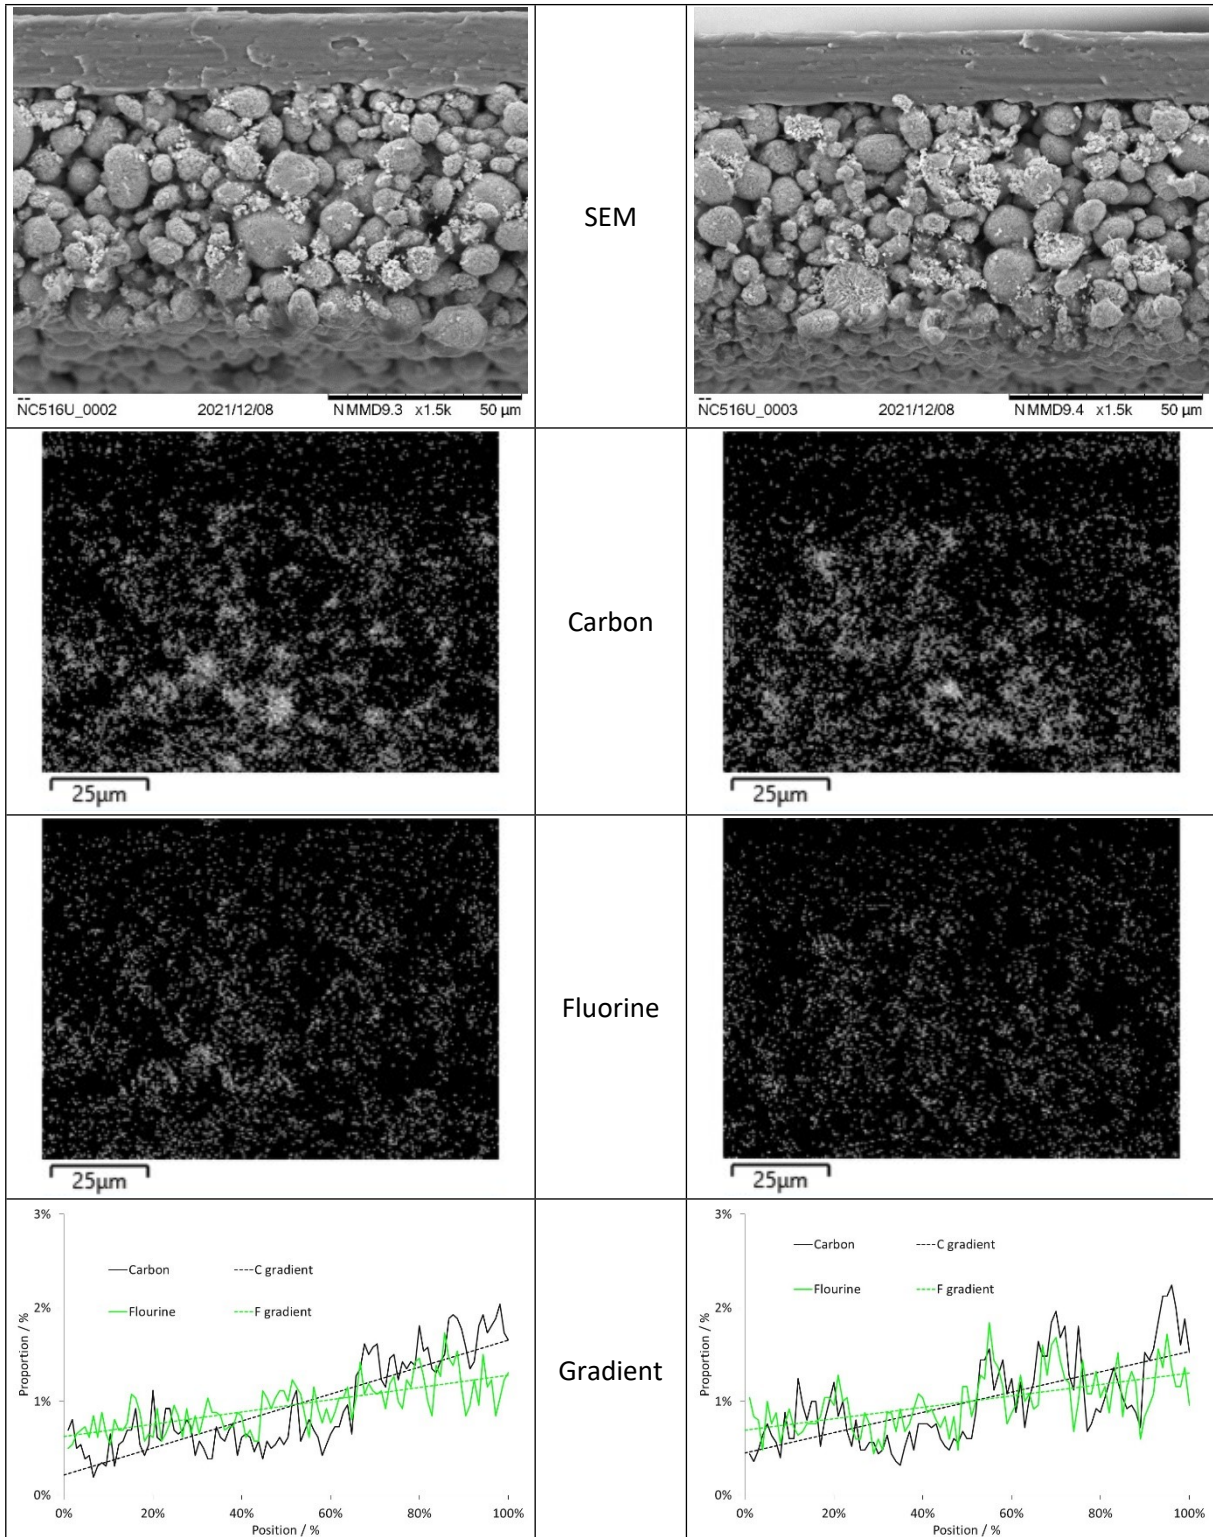

Figure S15. SEM Images And EDS Maps (516UA And 516UB)

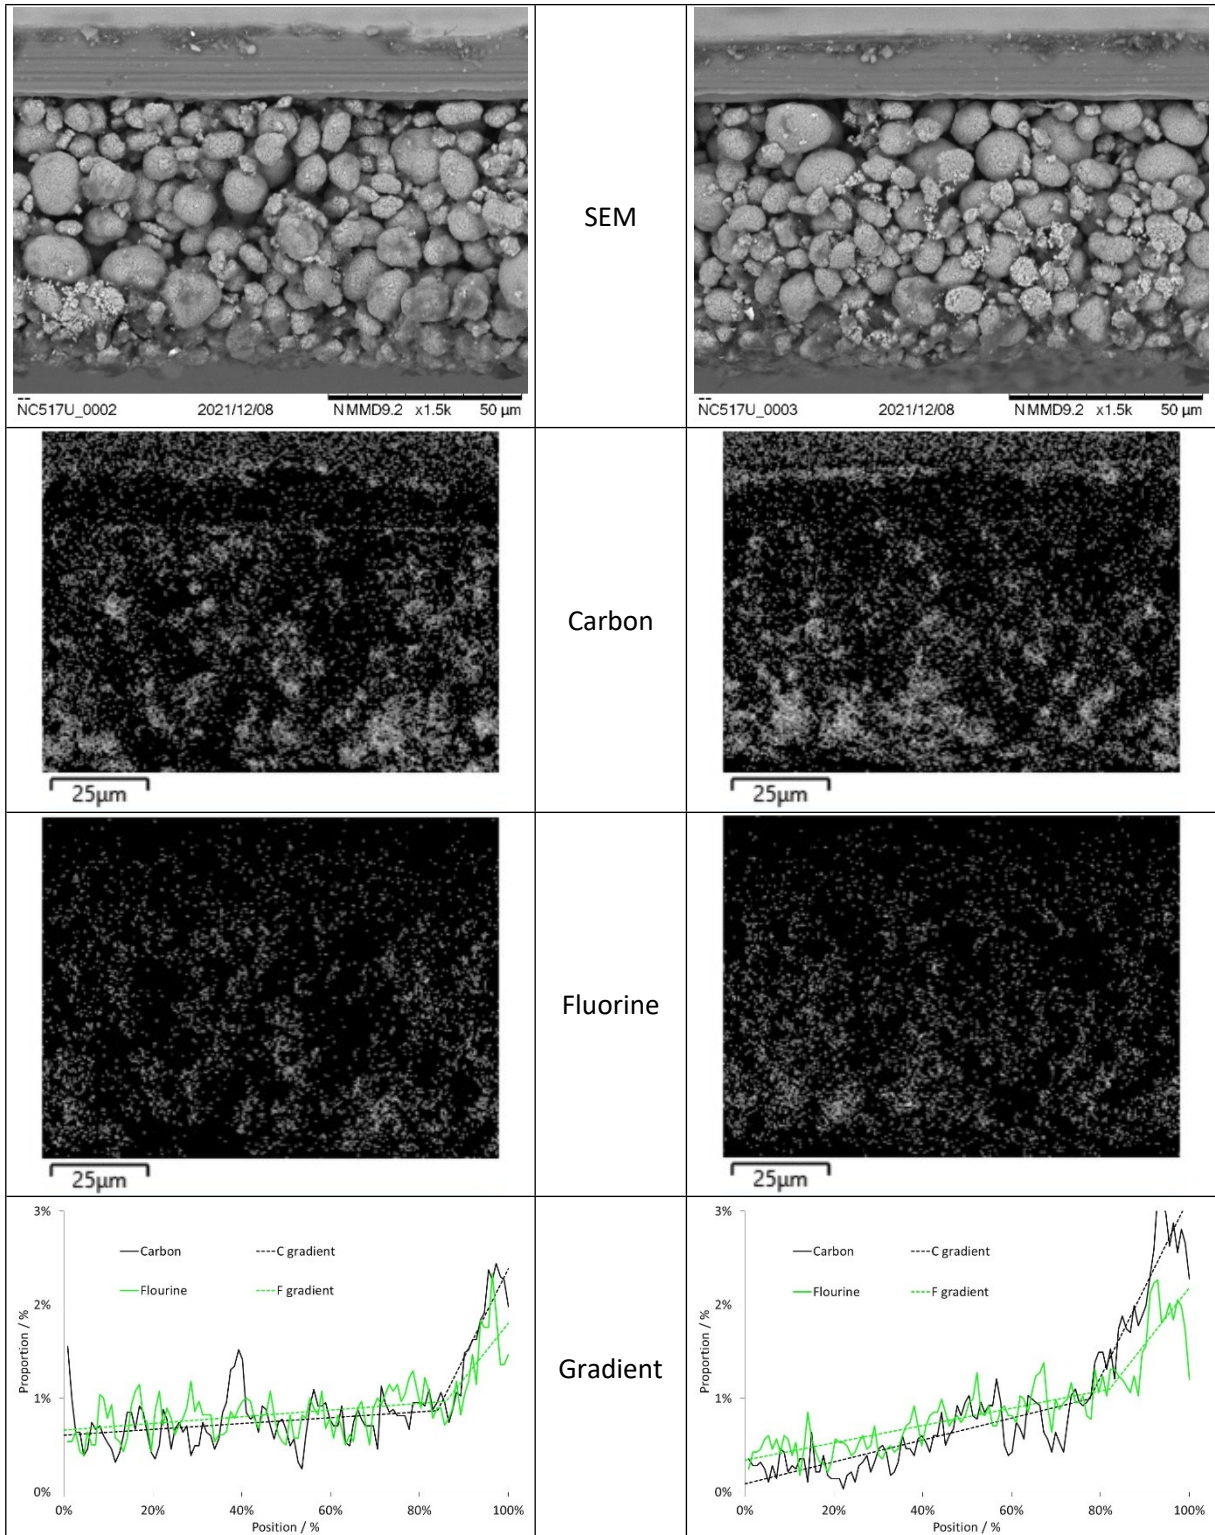

Figure S16. SEM Images And EDS Maps (517UA And 517UB)



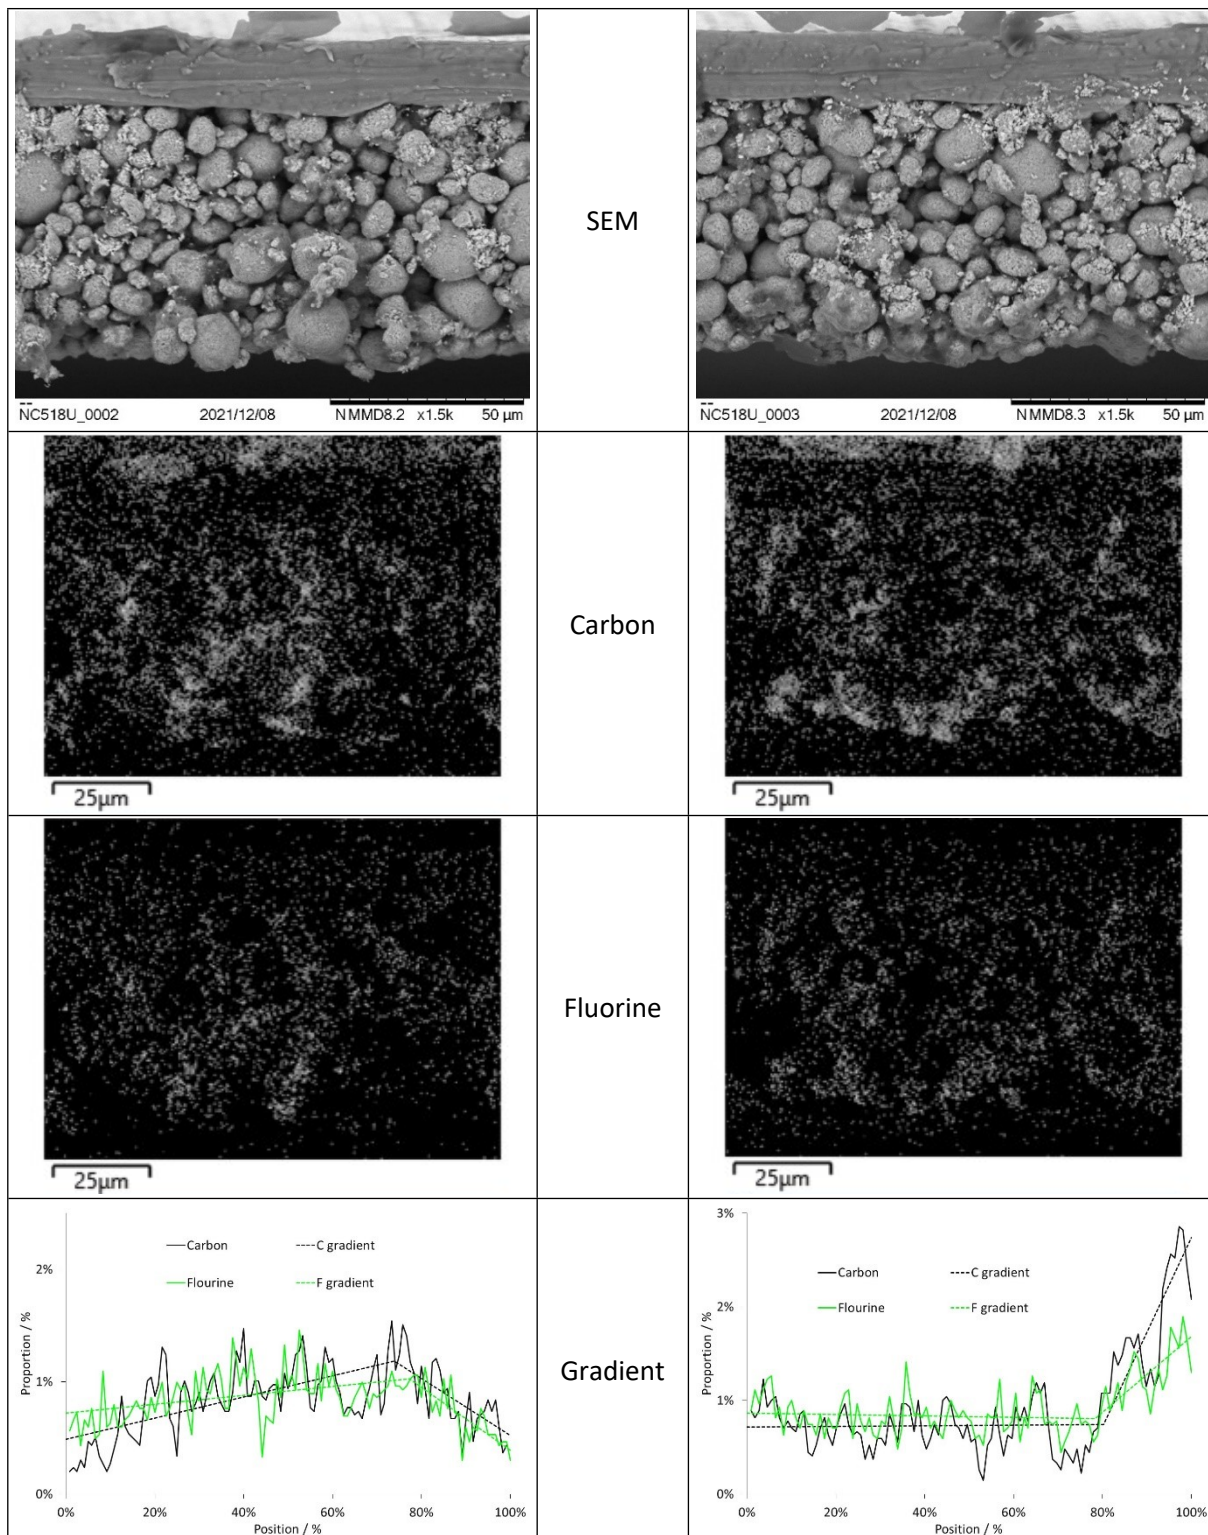

Figure S17. SEM Images And EDS Maps (518UA And 518UB)

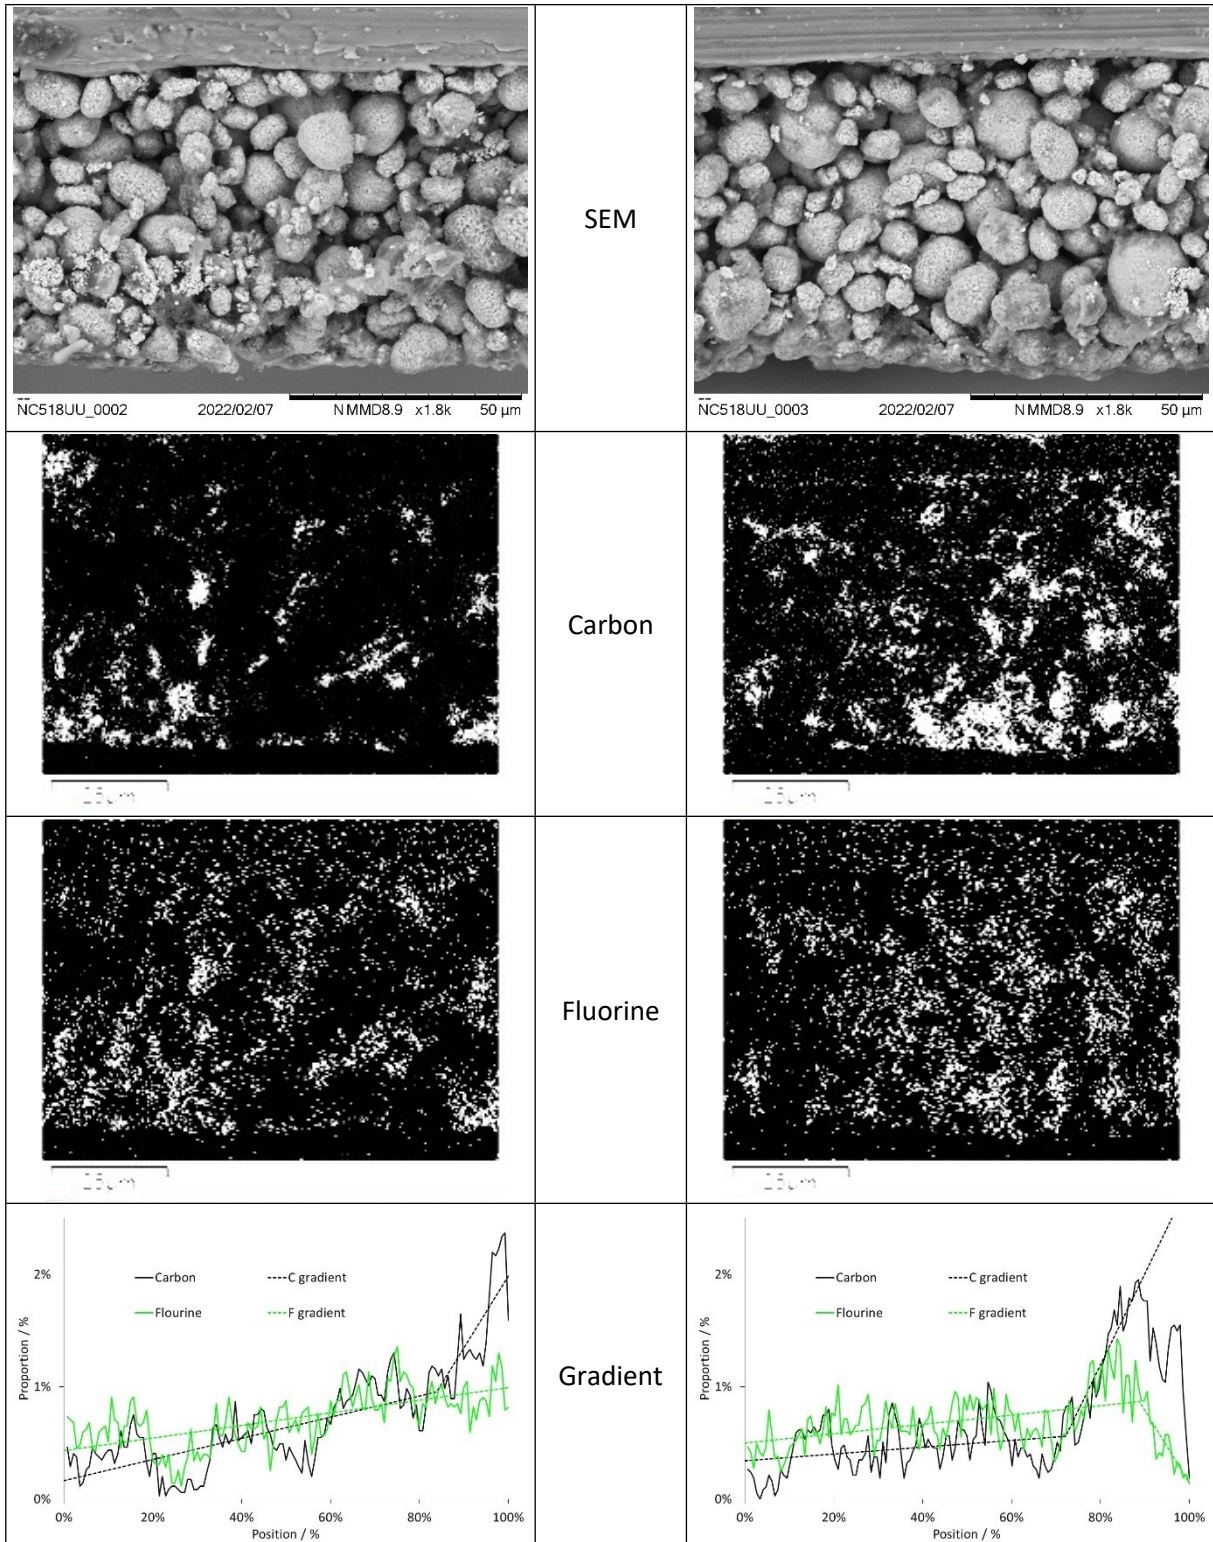

Figure S18. SEM Images And EDS Maps (518UC And 518UD)



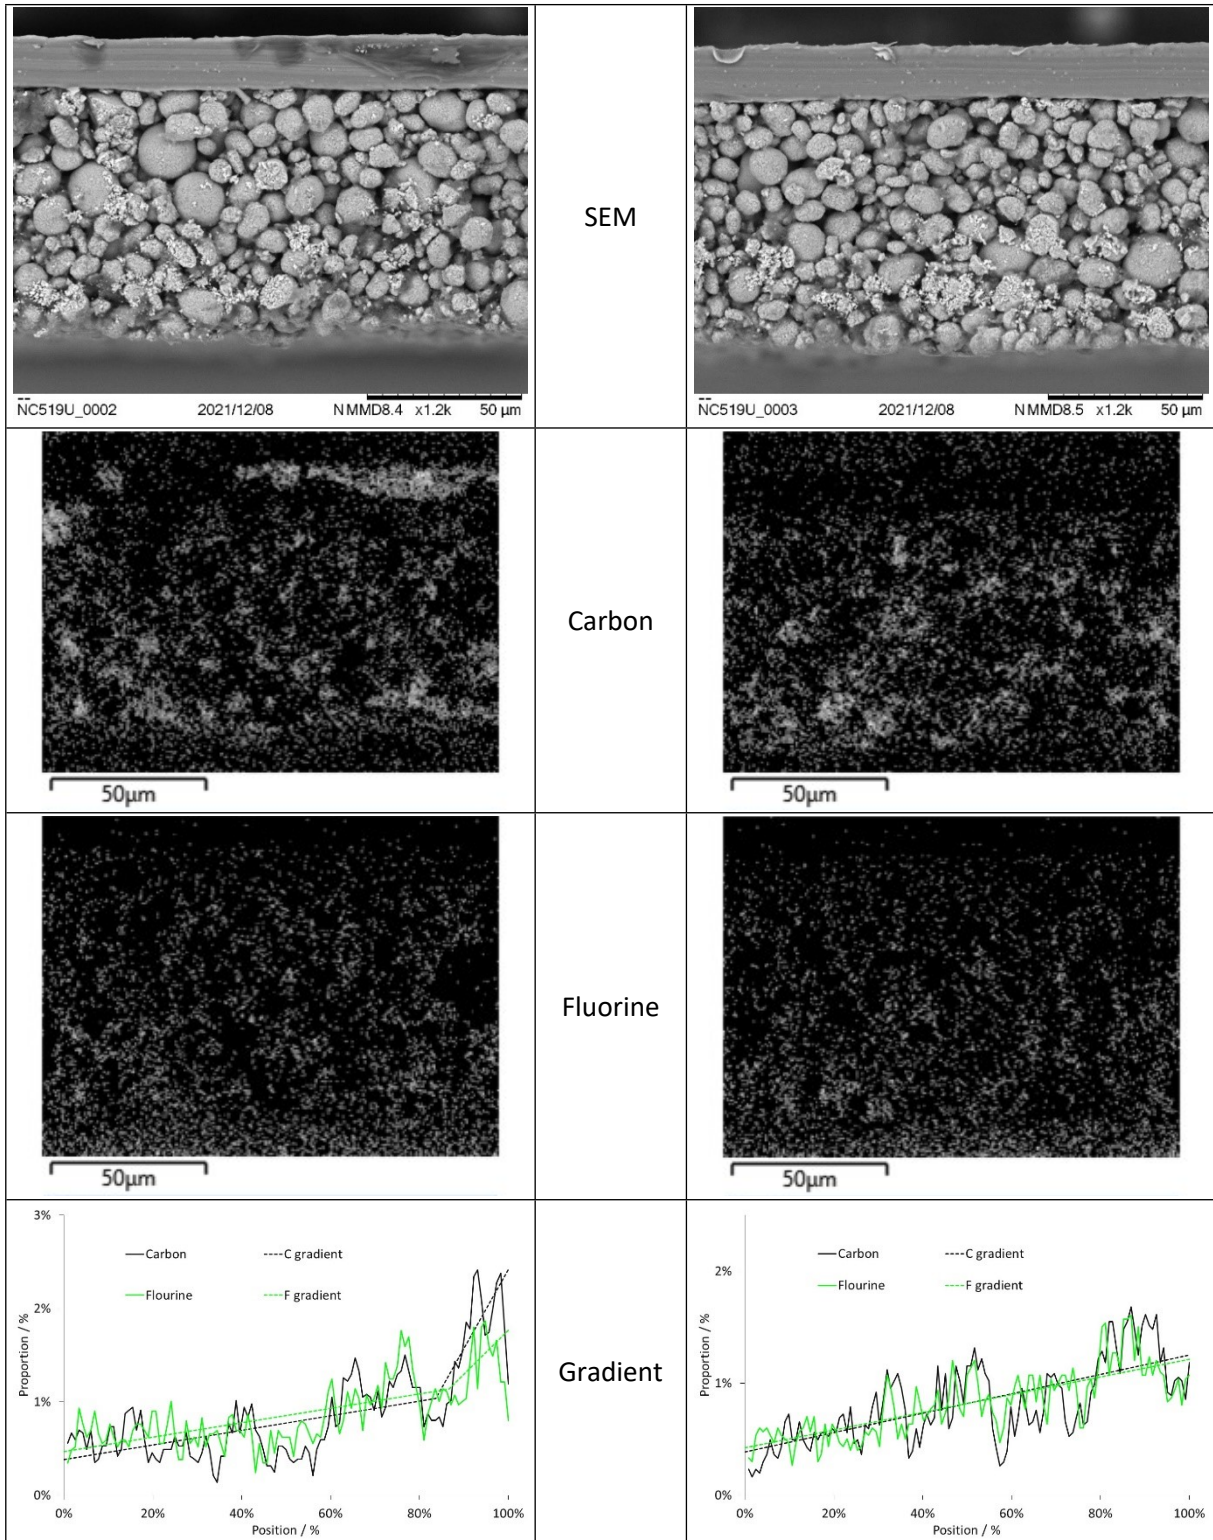

Figure S19. SEM Images And EDS Maps (519UA And 519UB)

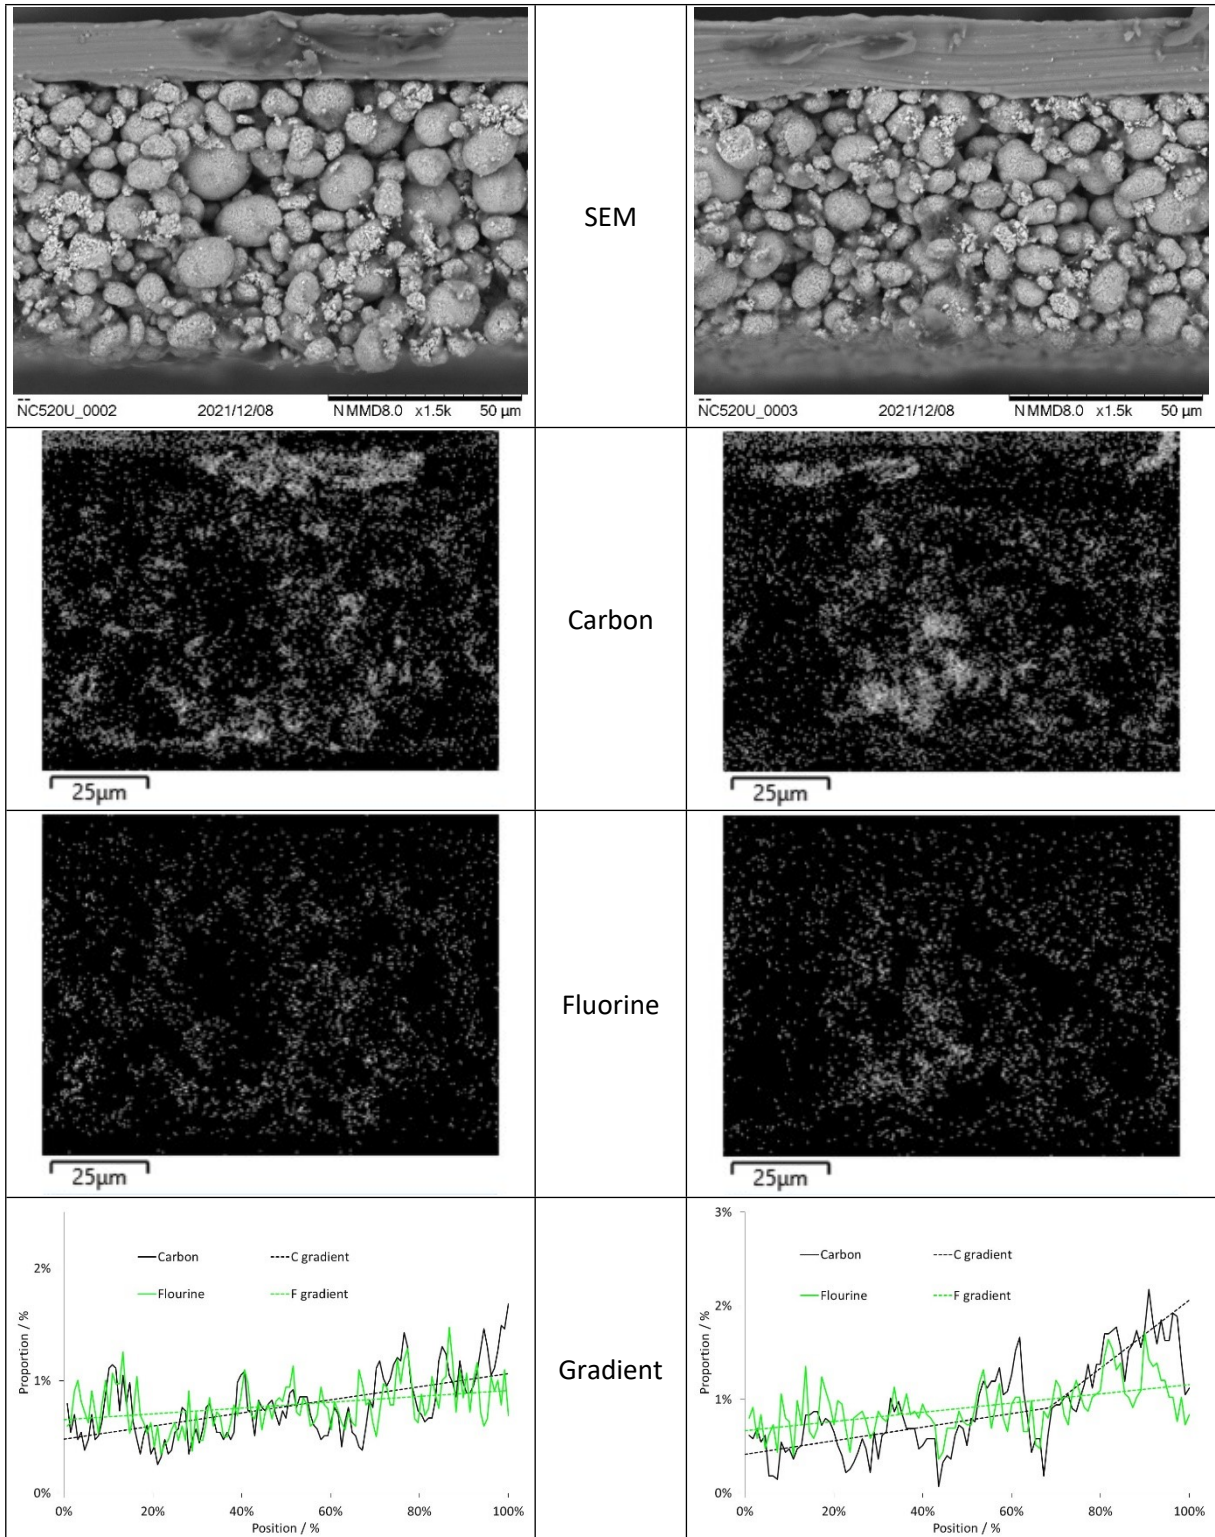

Figure S20. SEM Images And EDS Maps (520UA And 520UB)



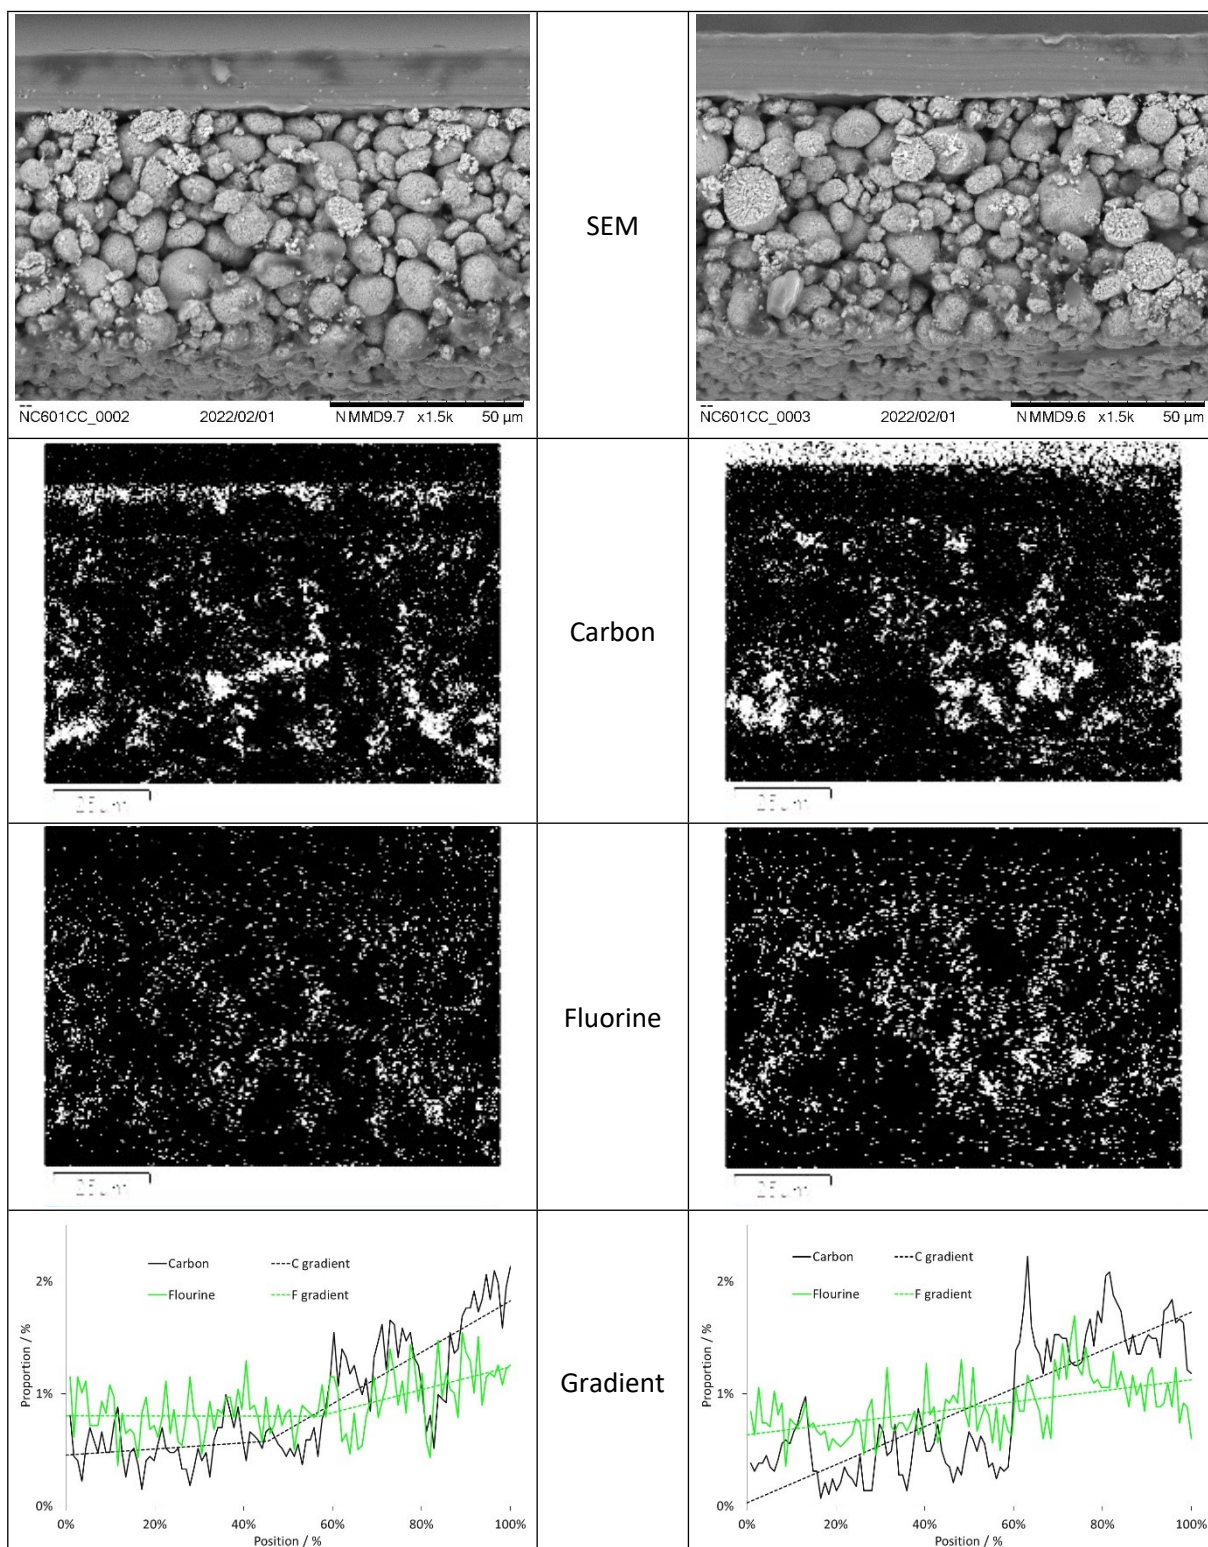

Figure S21. SEM Images And EDS Maps (601CCA And 601CCB)

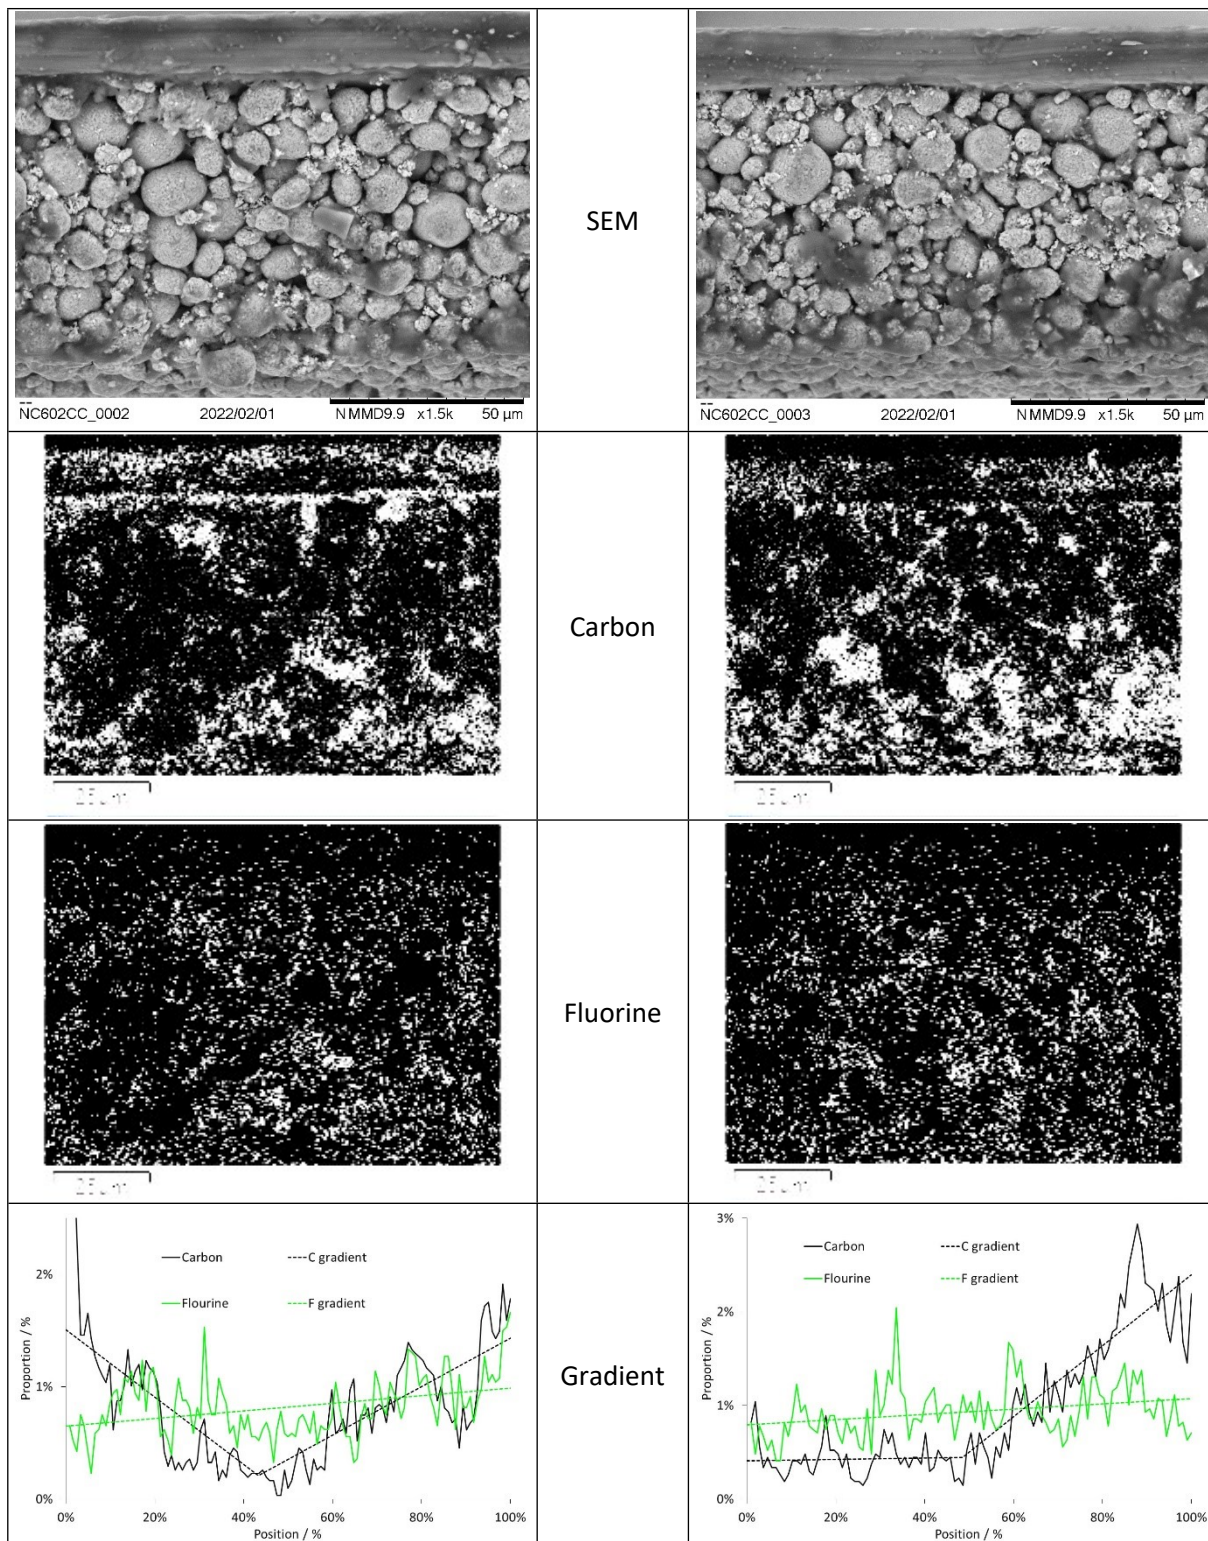

Figure S22. SEM Images And EDS Maps (602CCA And 602CCB)



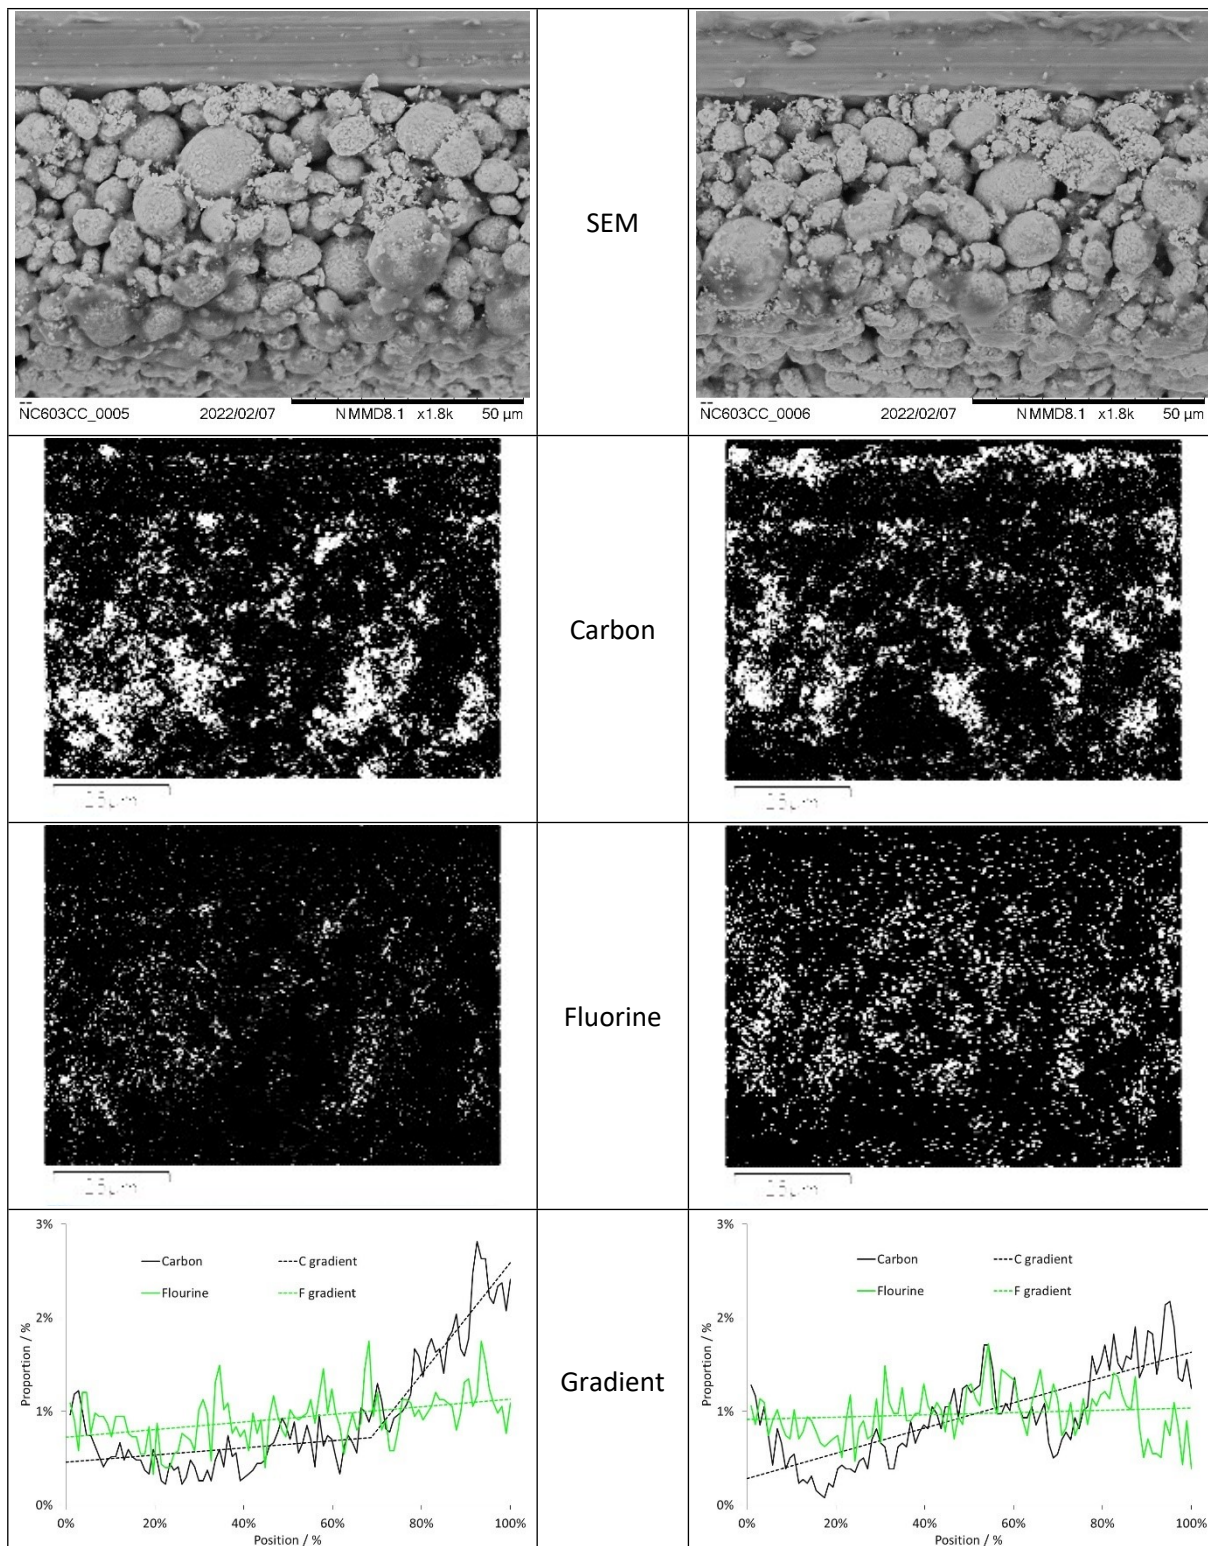

Figure S23. SEM Images And EDS Maps (603CCC And 603CCD)

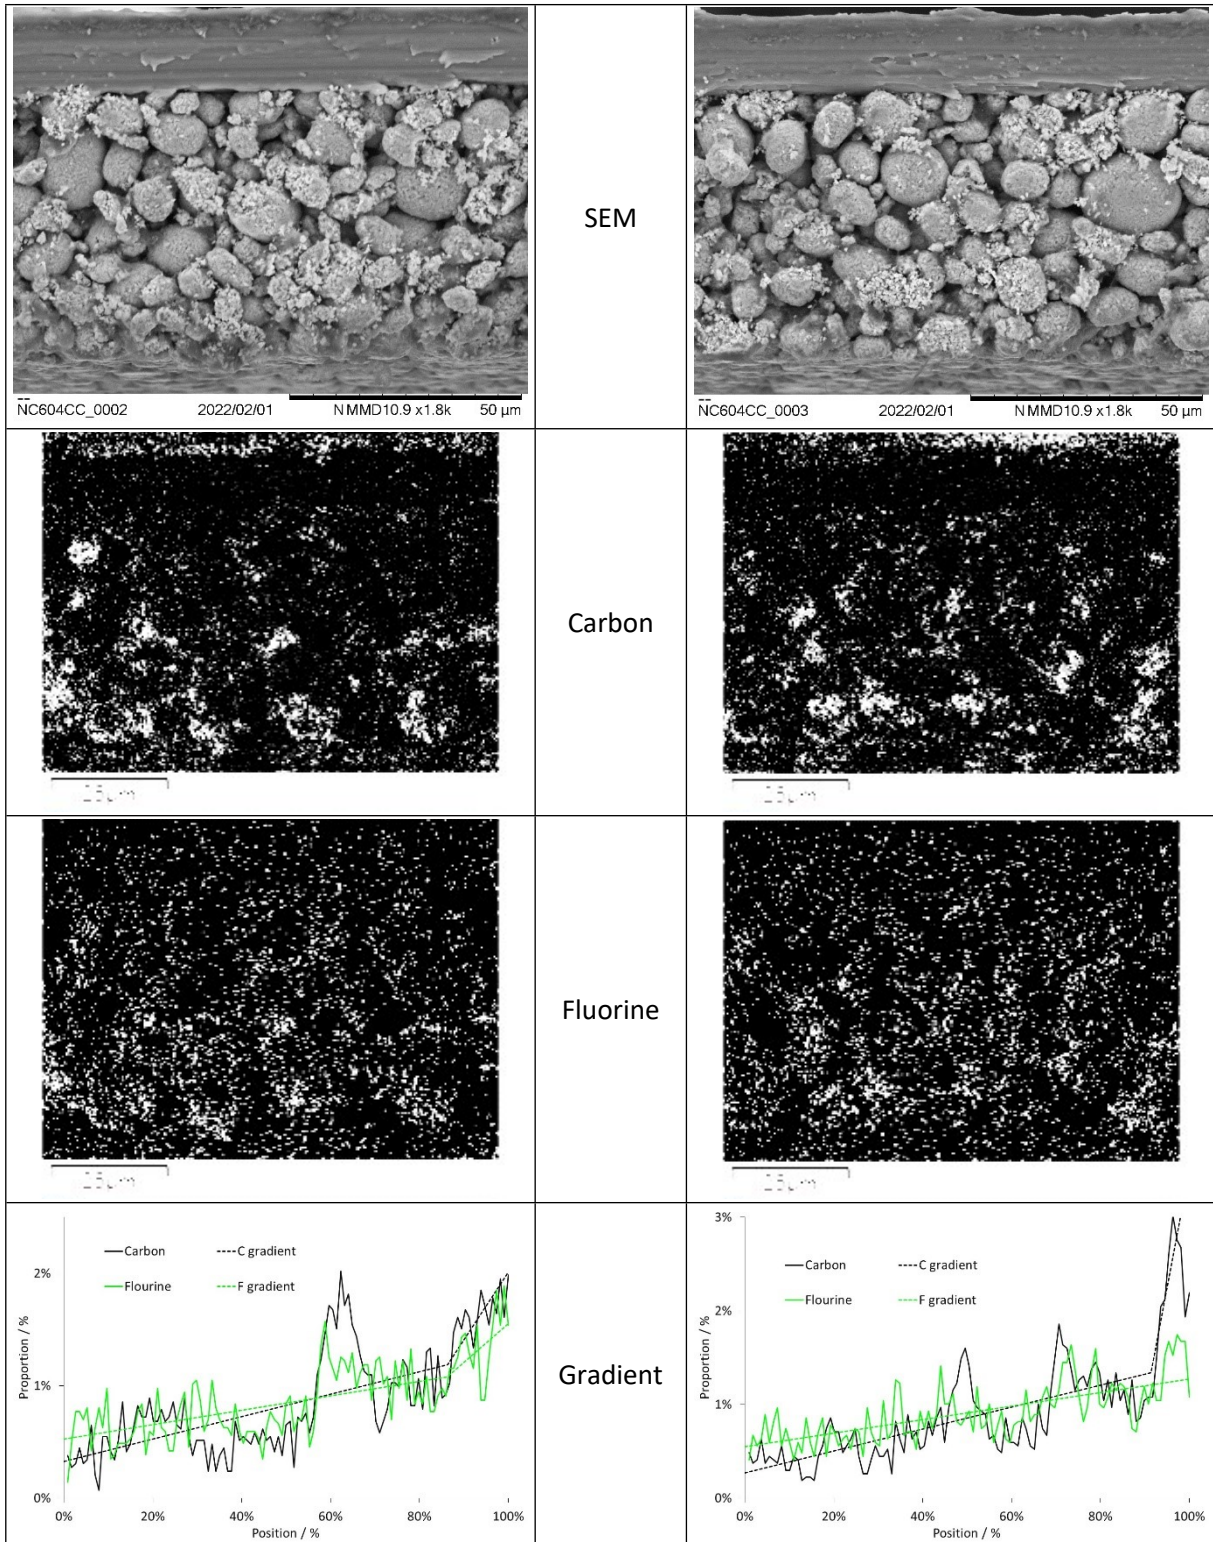

Figure 1. SEM Images And EDS Maps (604CCA And 604CCB)



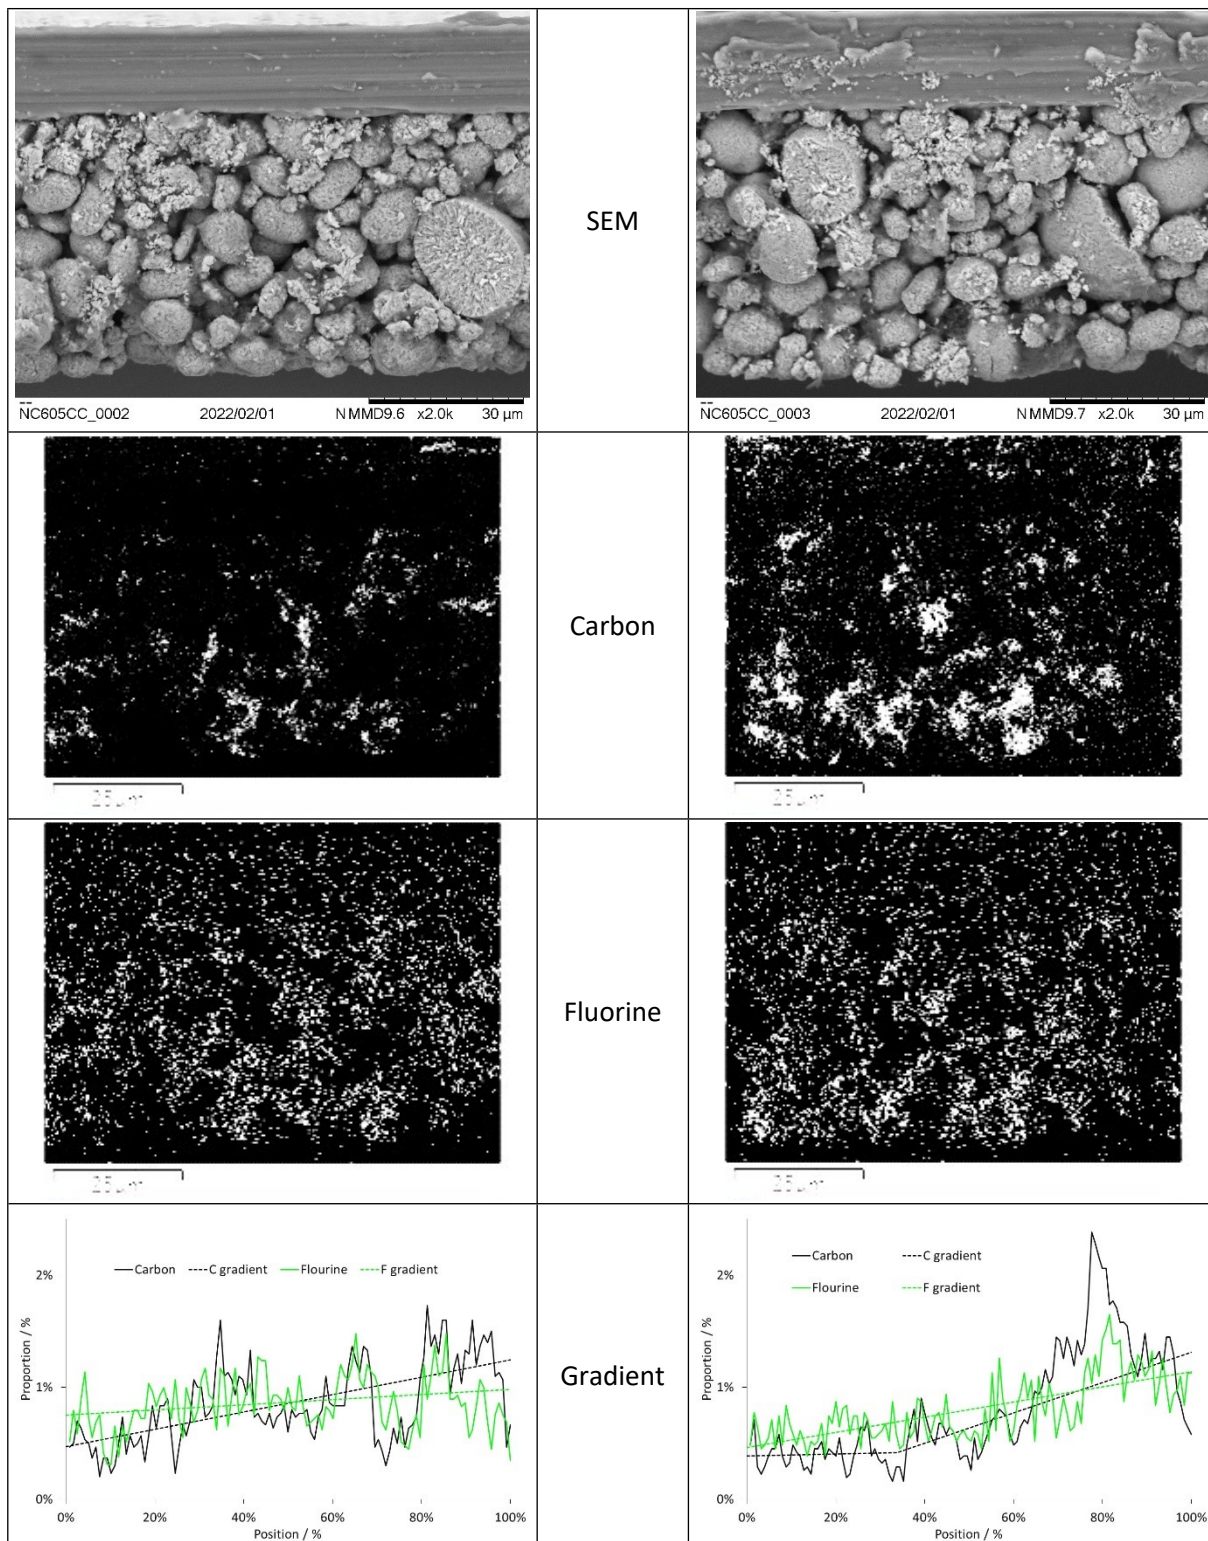

Figure S25. SEM Images And EDS Maps (605CCA And 605CCB)

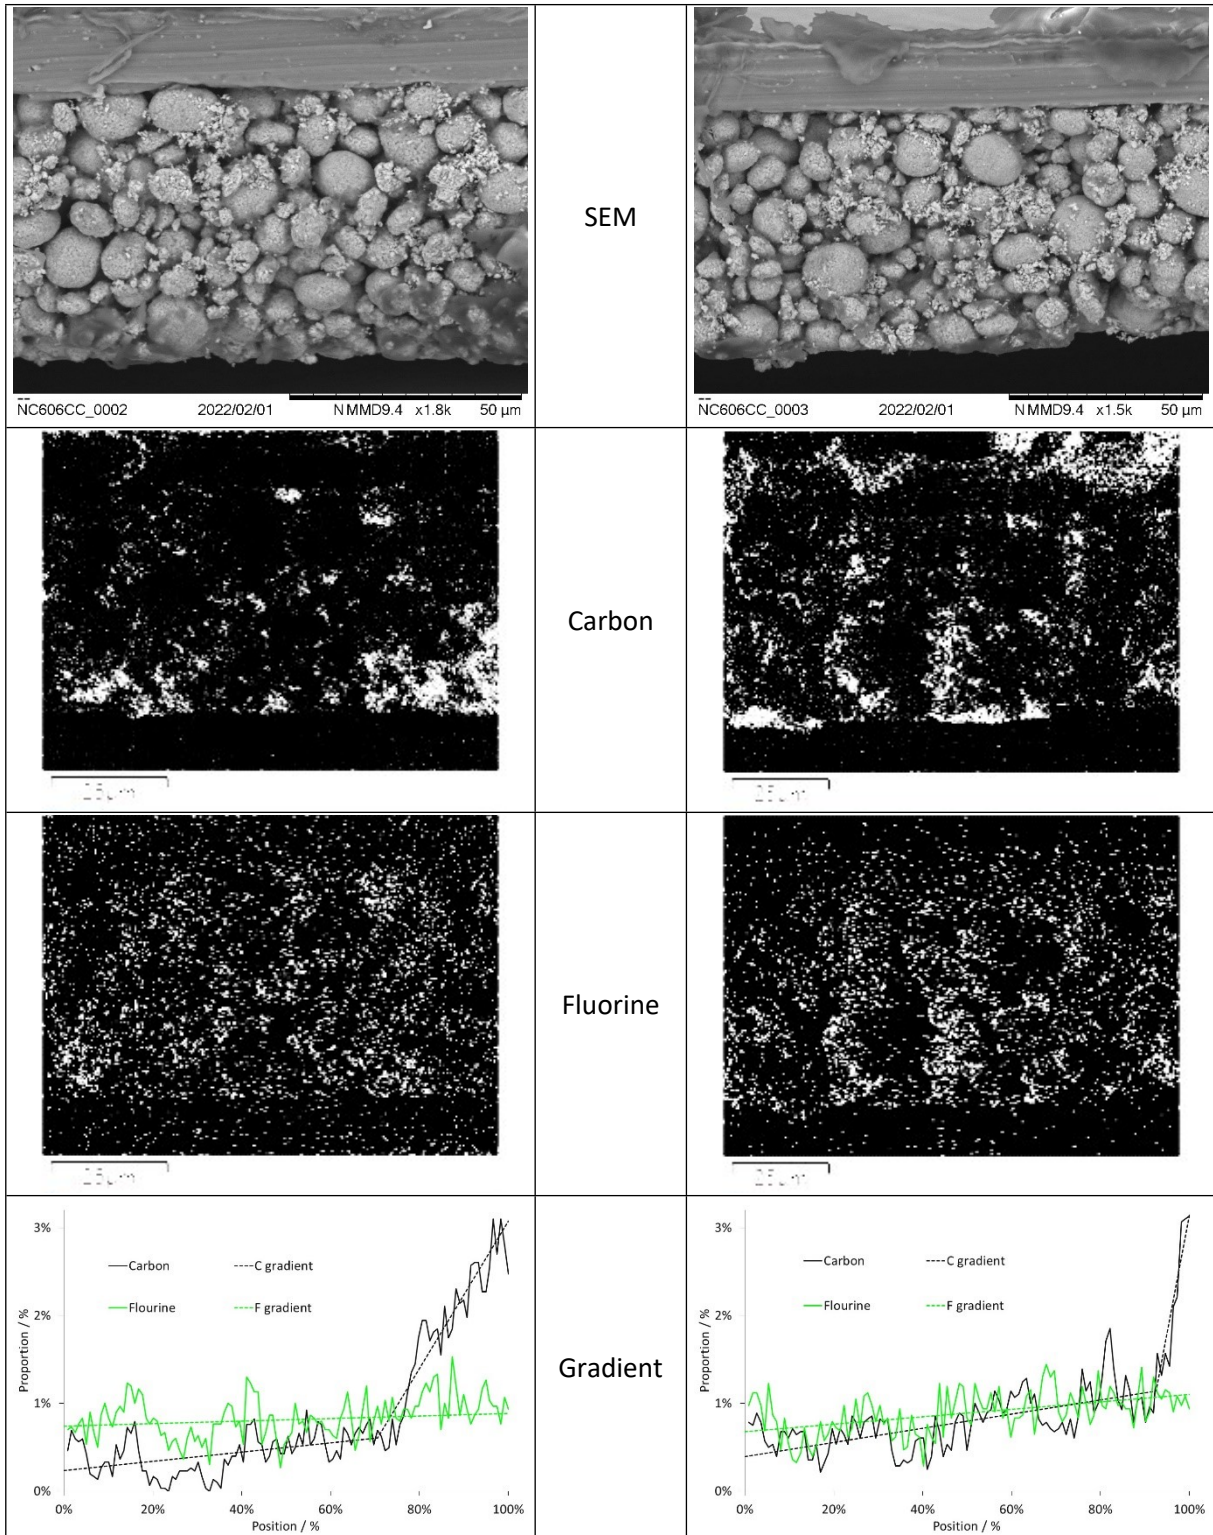

Figure S26. SEM Images And EDS Maps (606CCA And 606CCB)



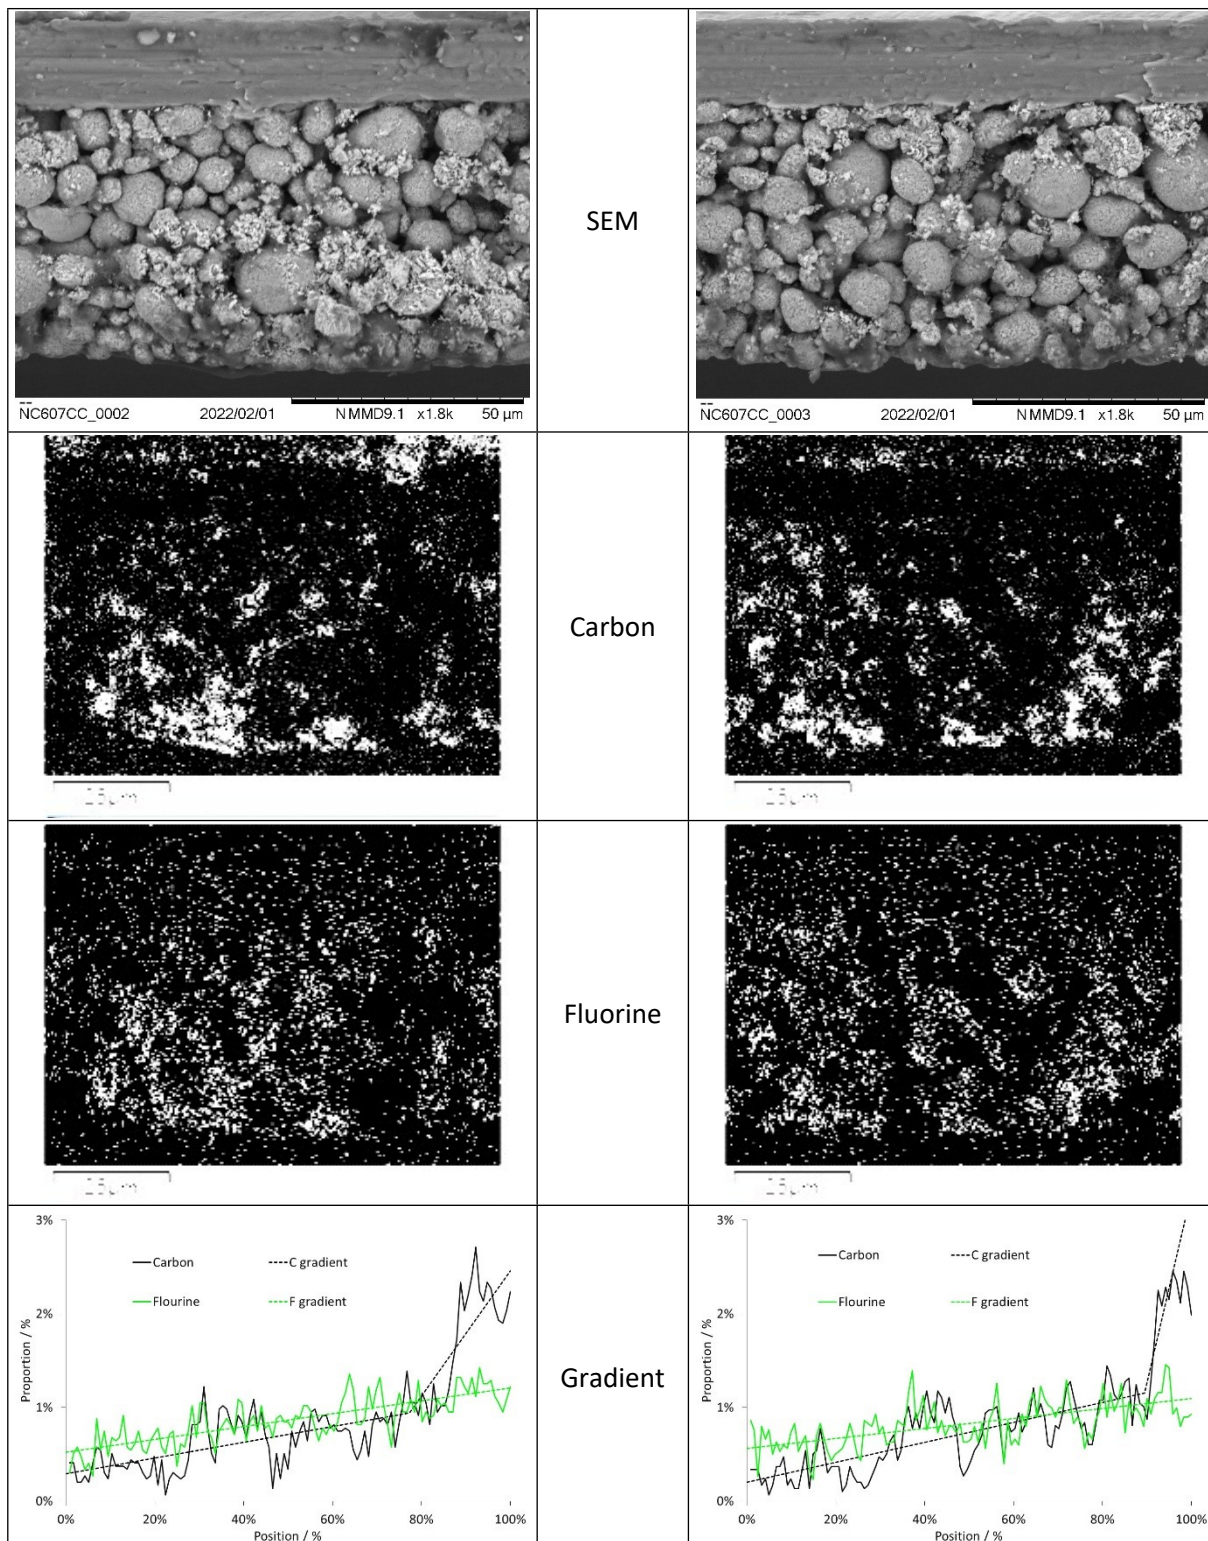

Figure S27. SEM Images And EDS Maps (607CCA And 607CCB)

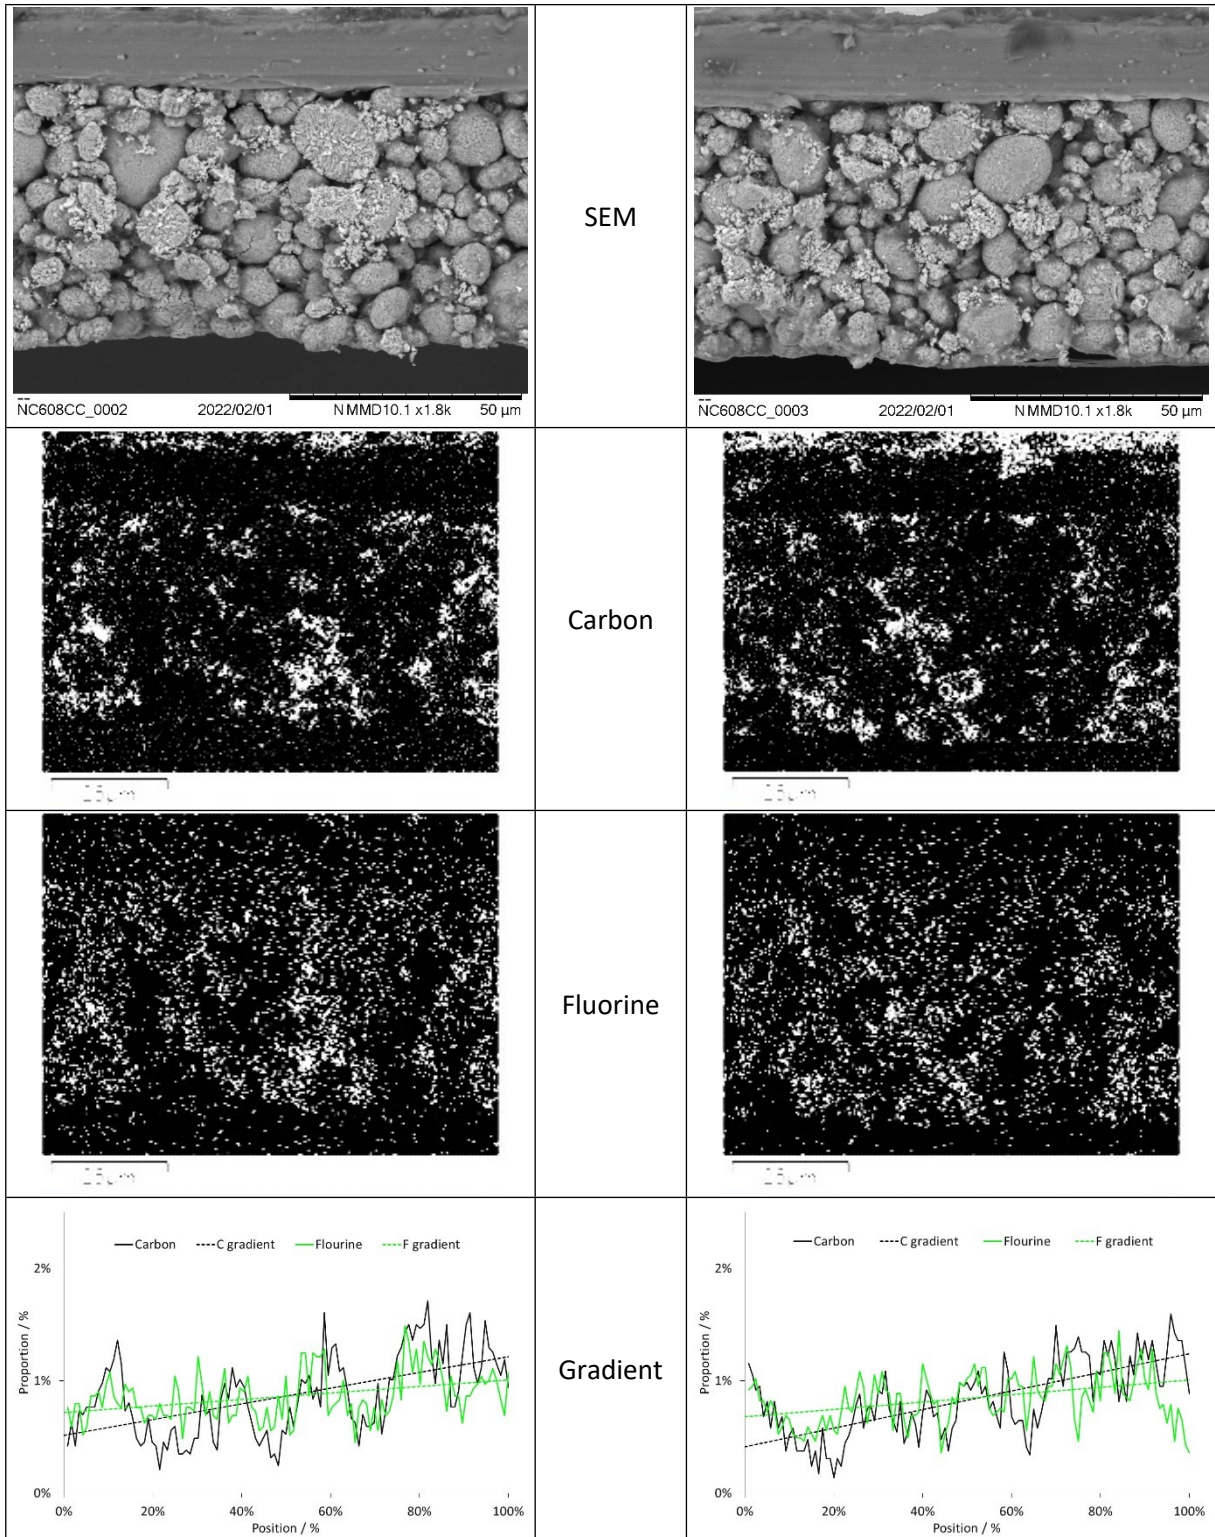

Figure S28. SEM Images And EDS Maps (608CCA And 608CCB)



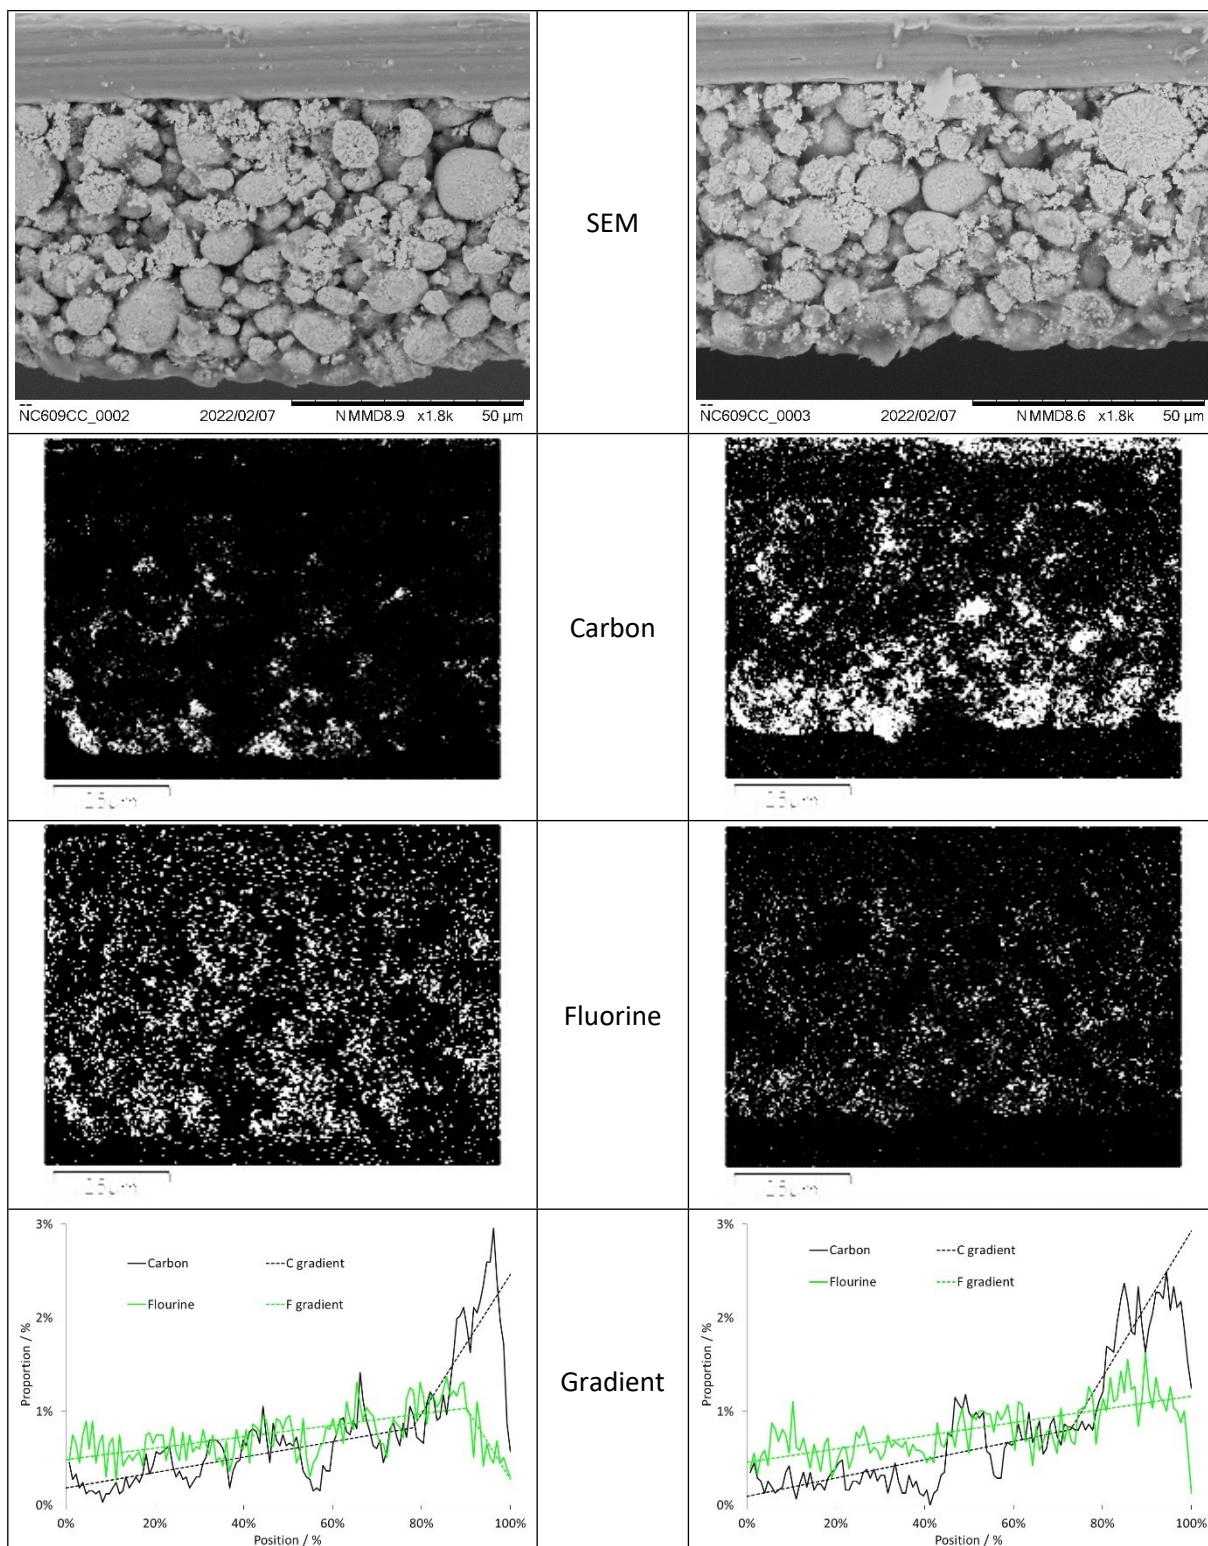

Figure S29. SEM Images And EDS Maps (609CCA And 609CCB)

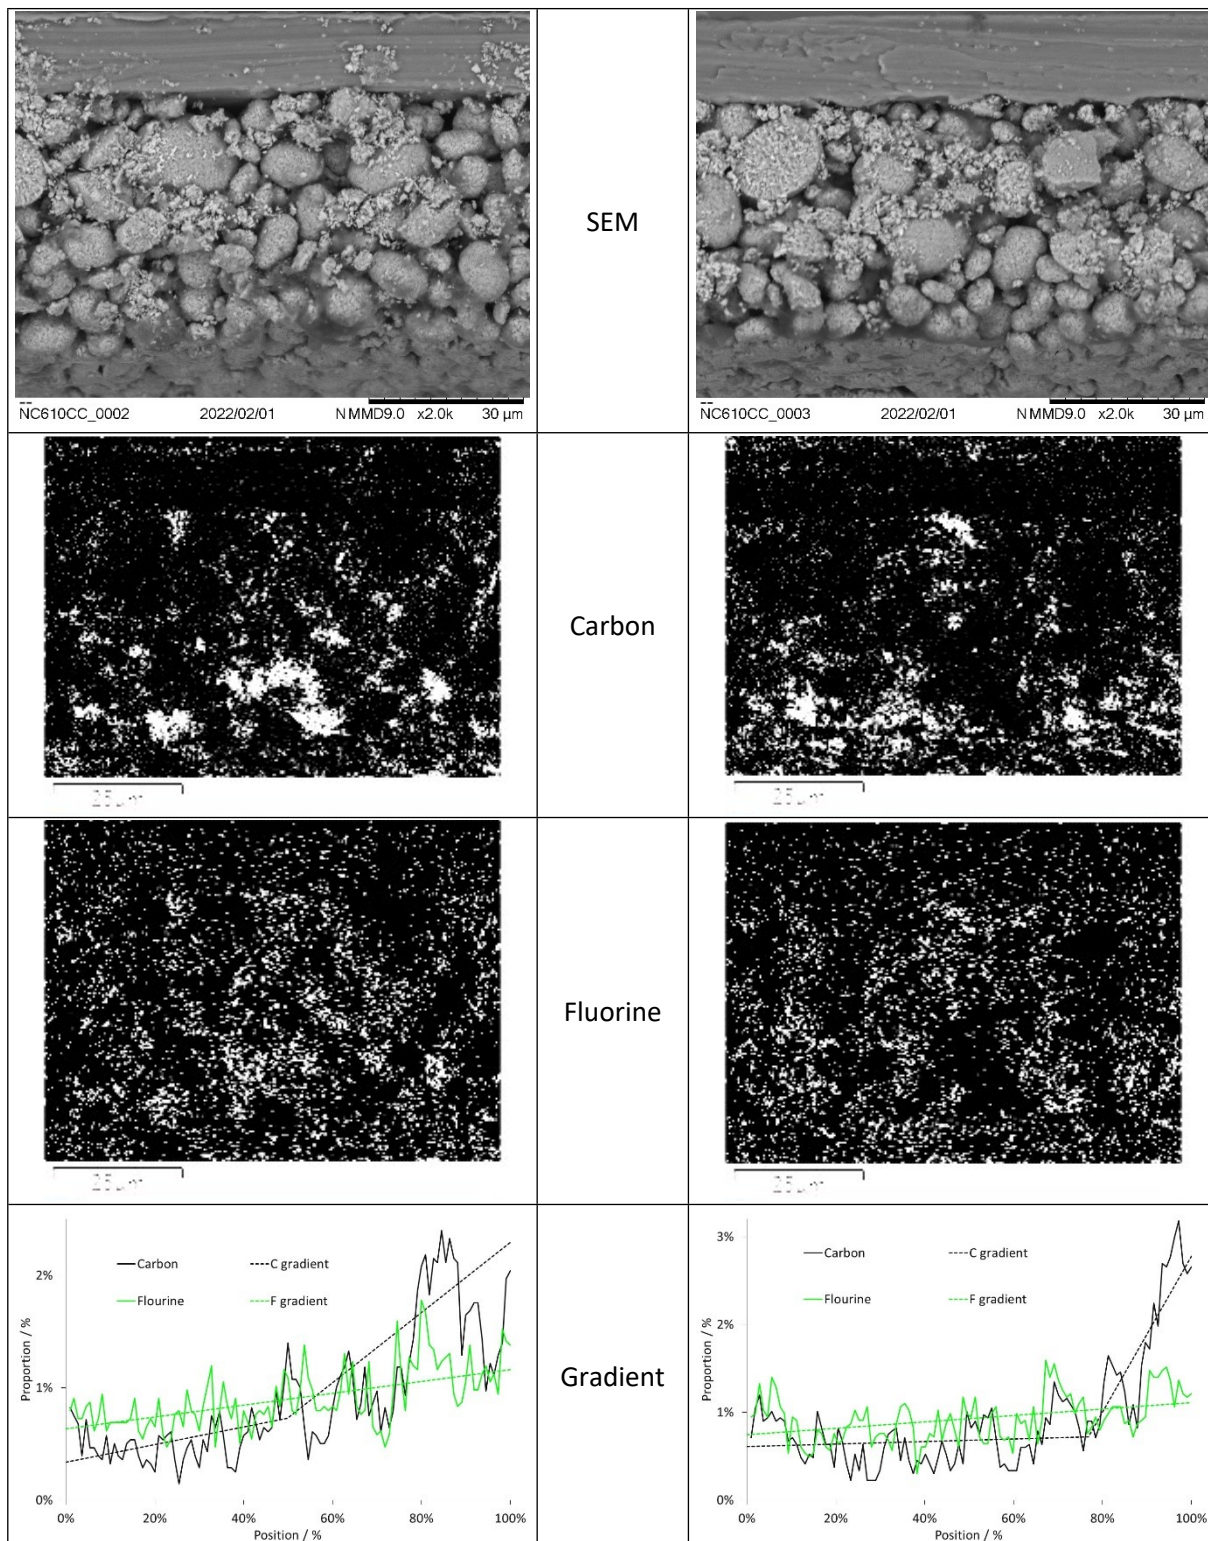

Figure S30. SEM Images And EDS Maps (610CCA And 610CCB)



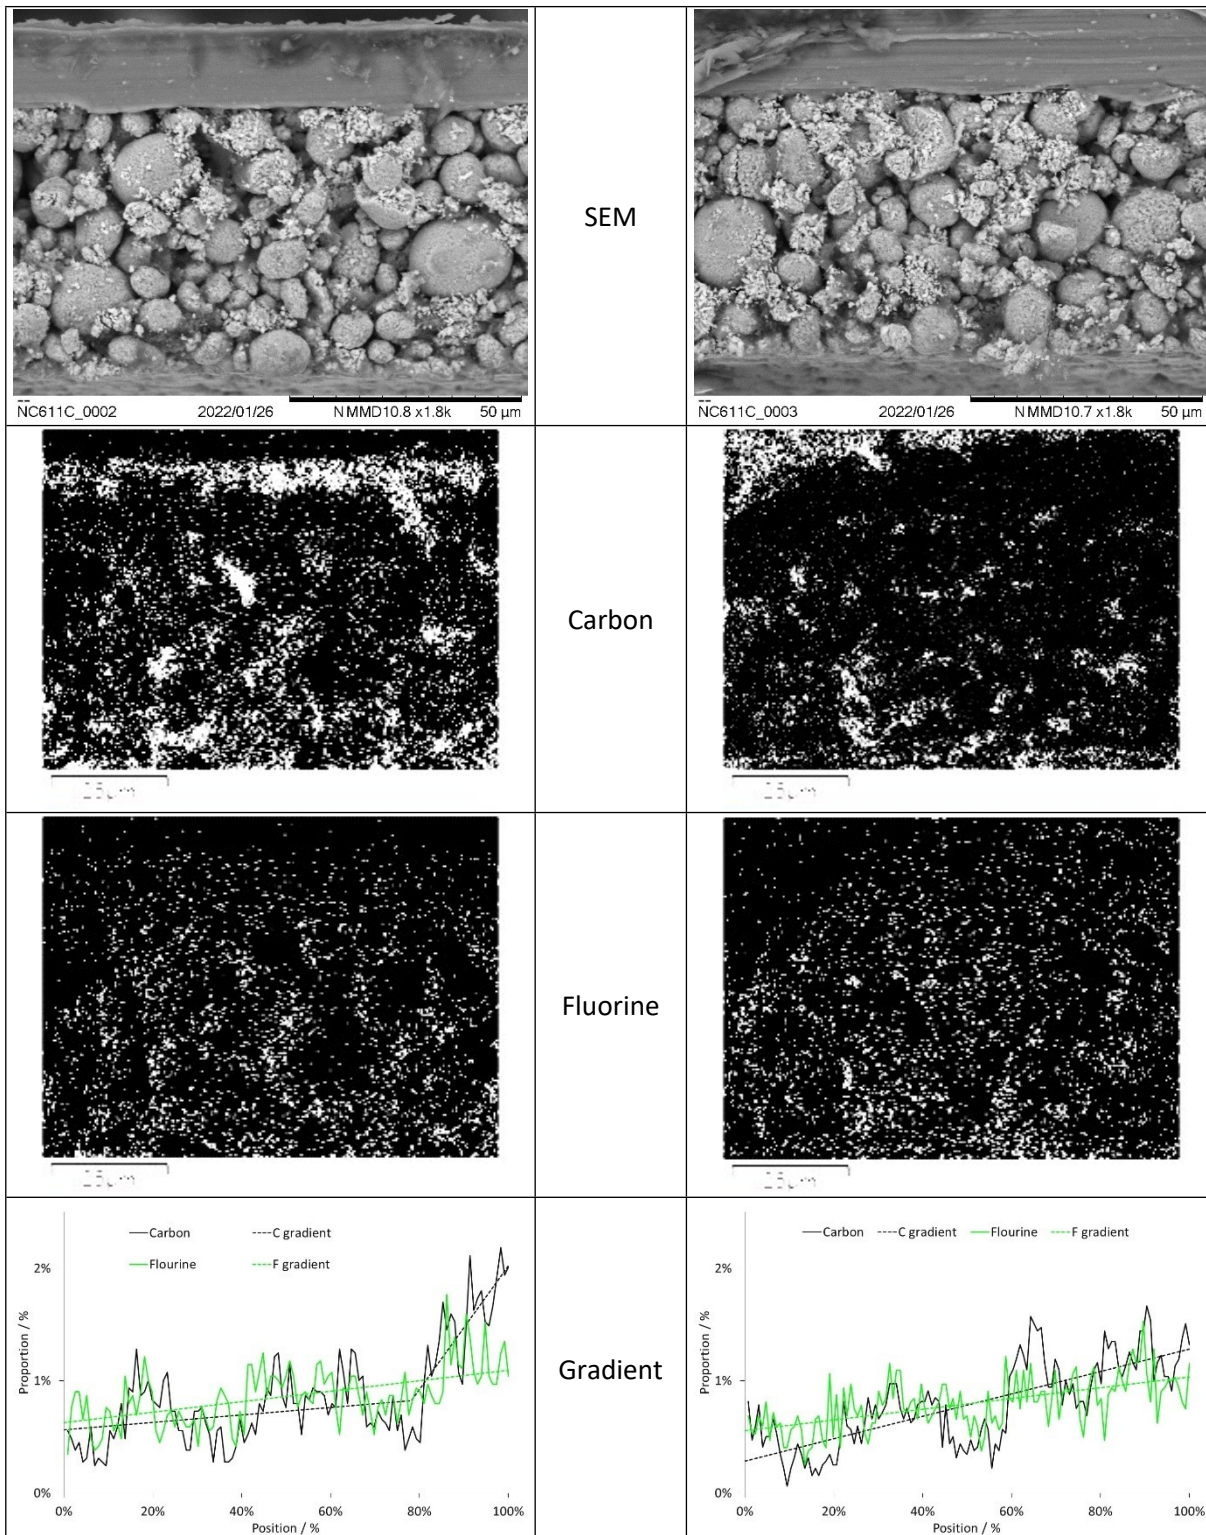

Figure S31. SEM Images And EDS Maps (611CA And 611CB)



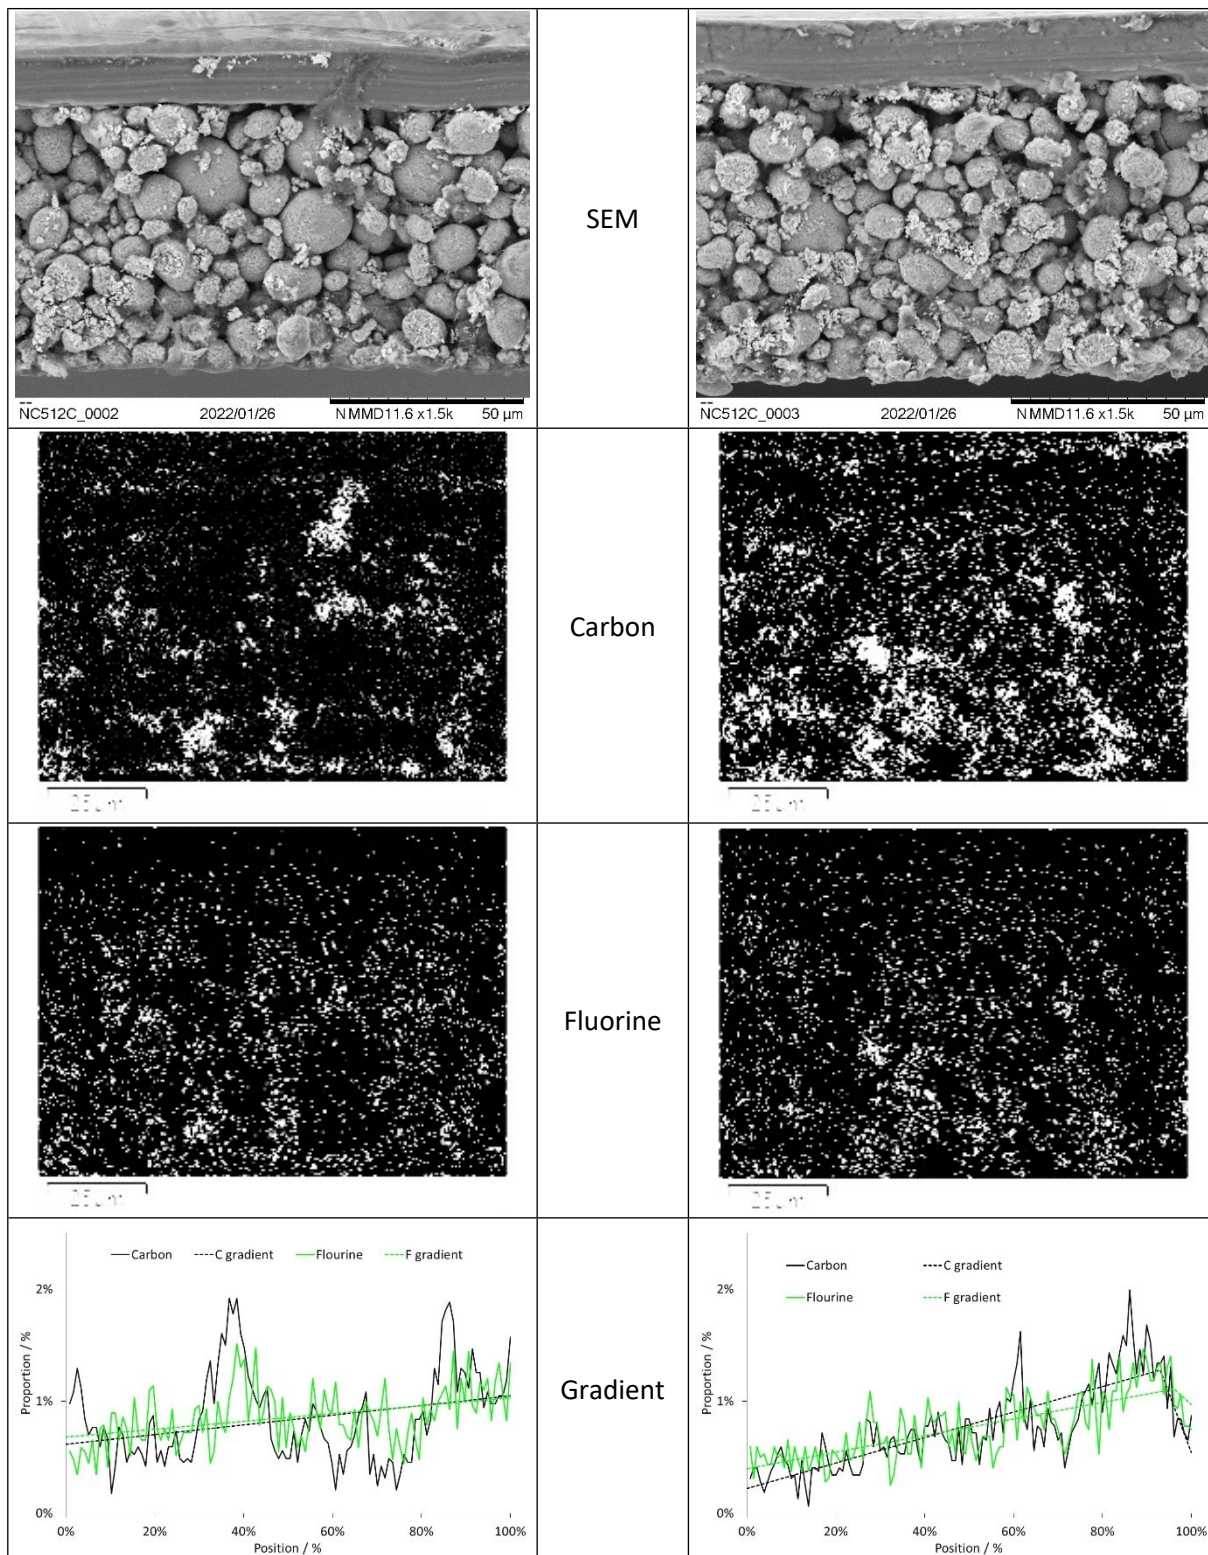

Figure S32. SEM Images And EDS Maps (512CA And 512CB)

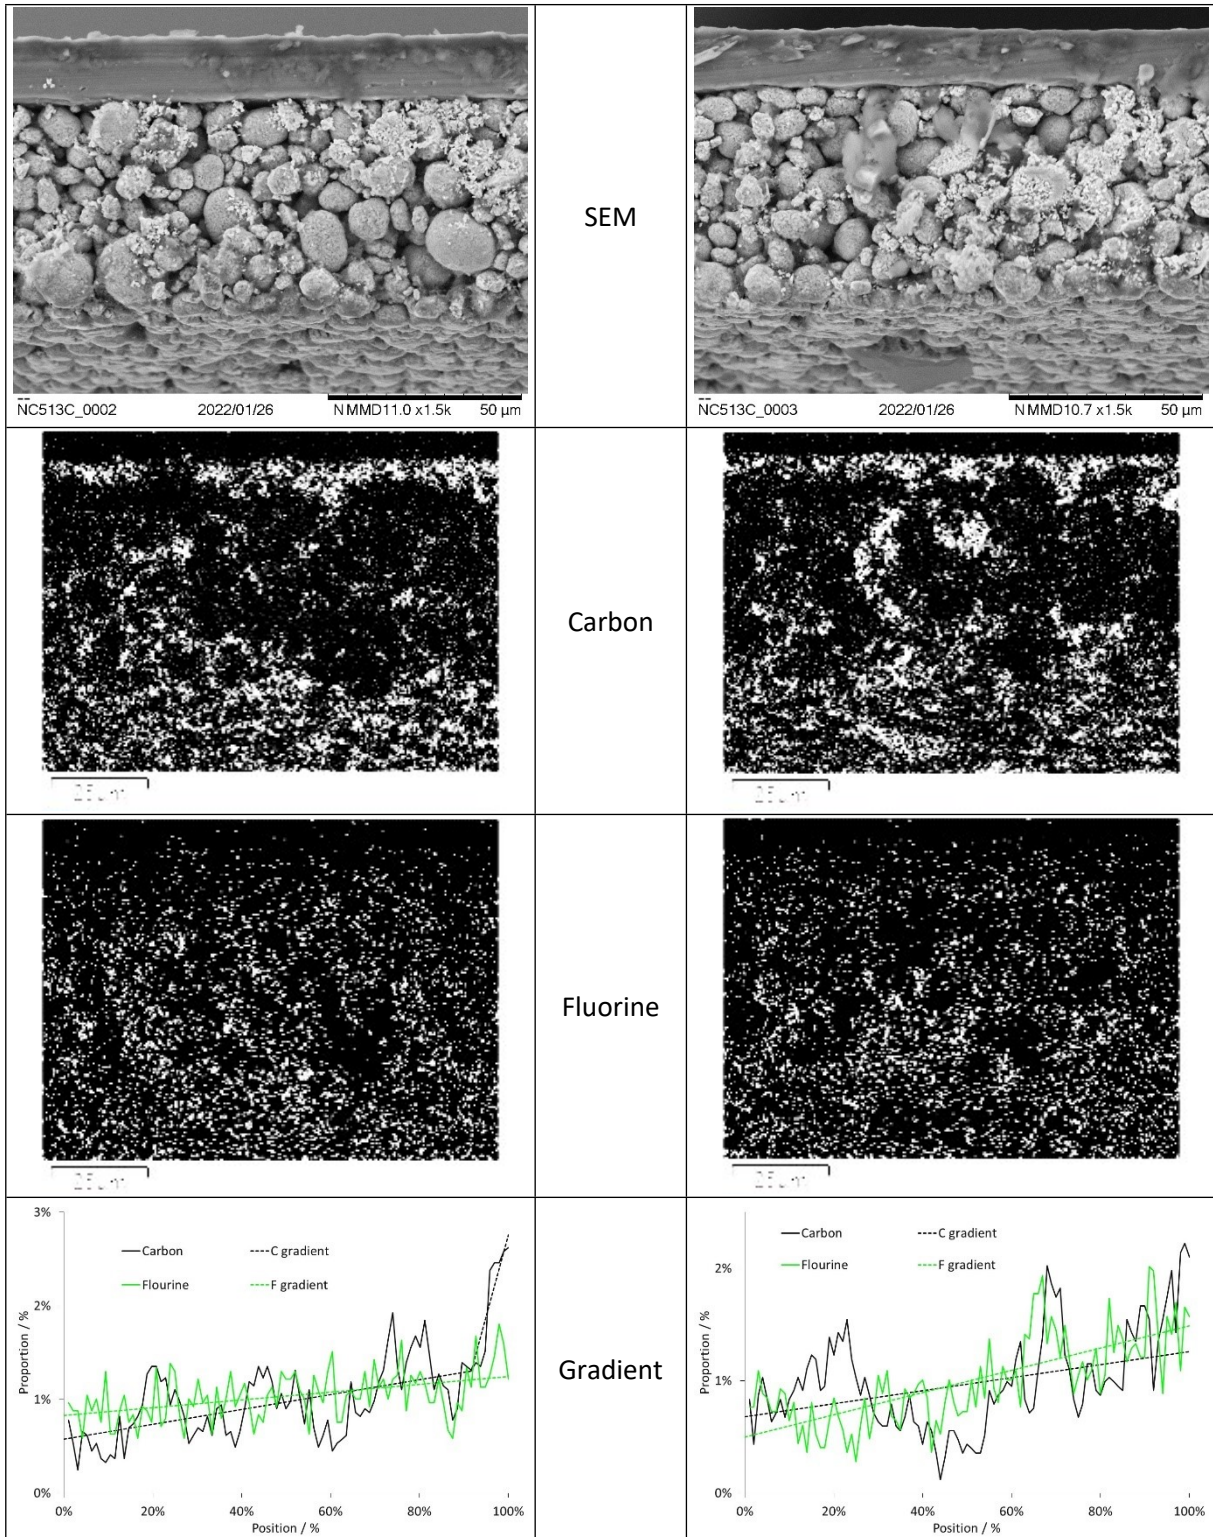

Figure S33. SEM Images And EDS Maps (513CA And 513CB)



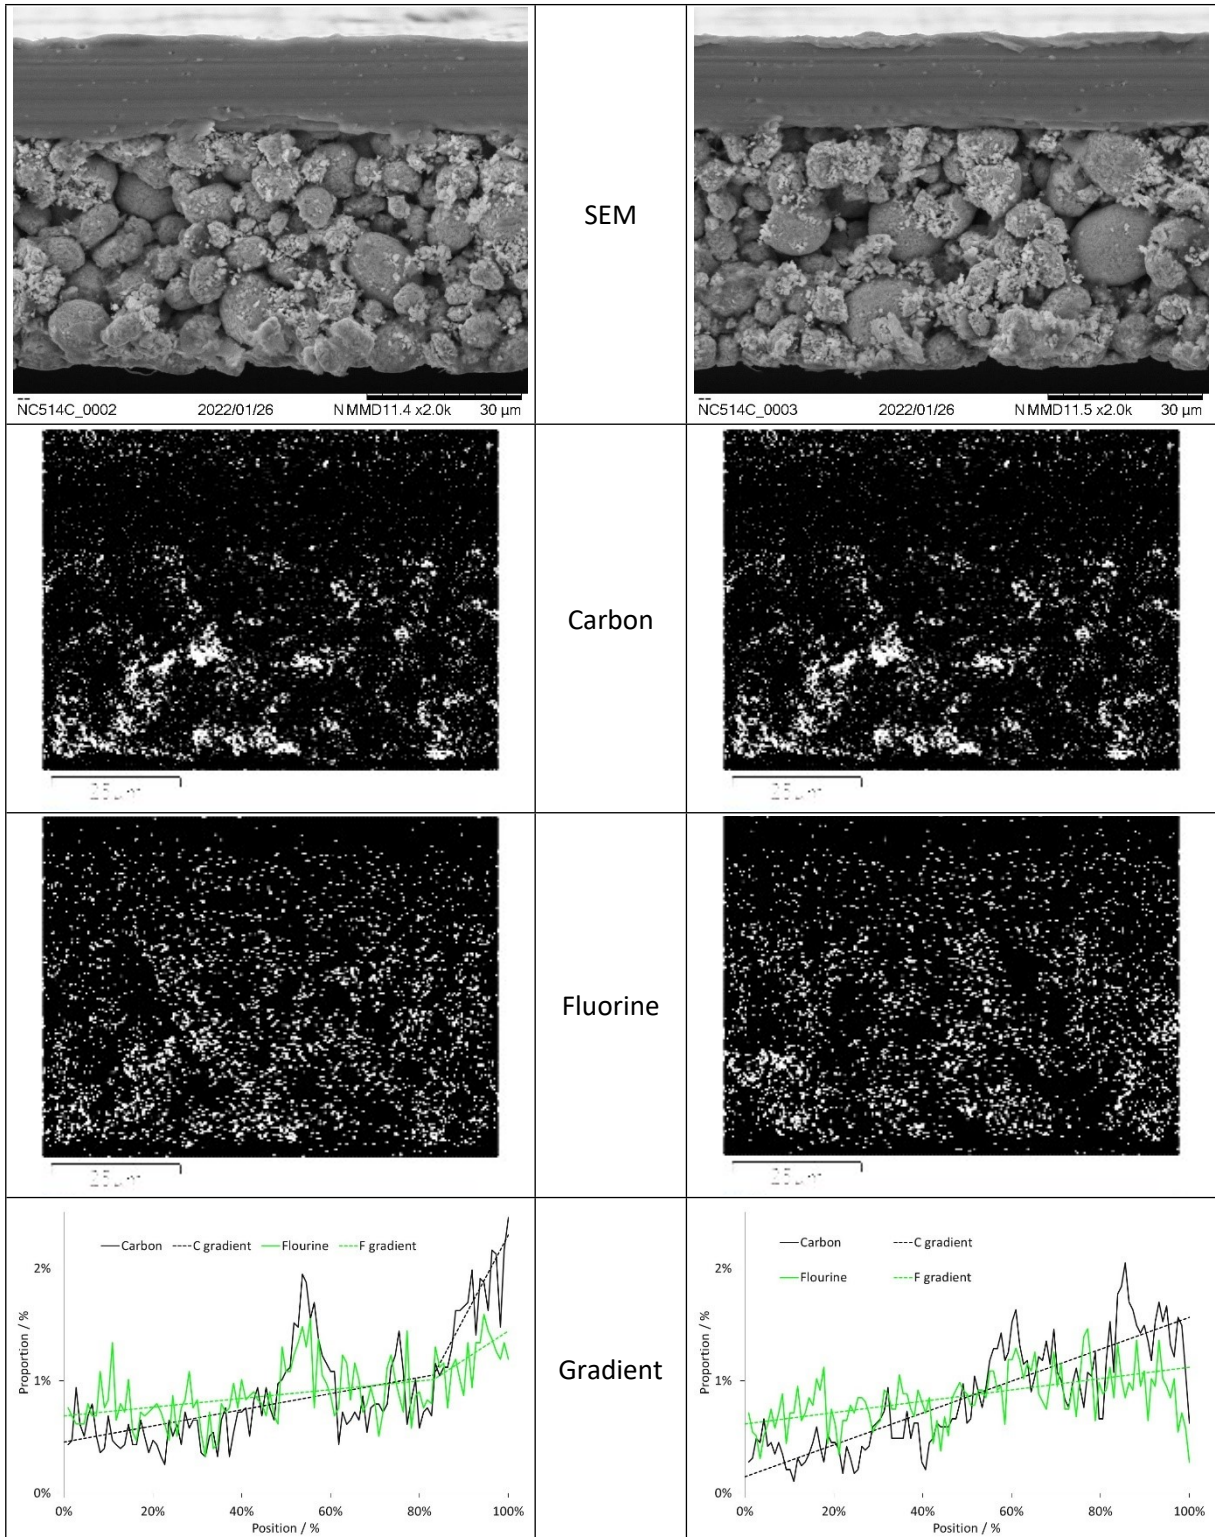

Figure S34. SEM Images And EDS Maps (514CA And 514CB)



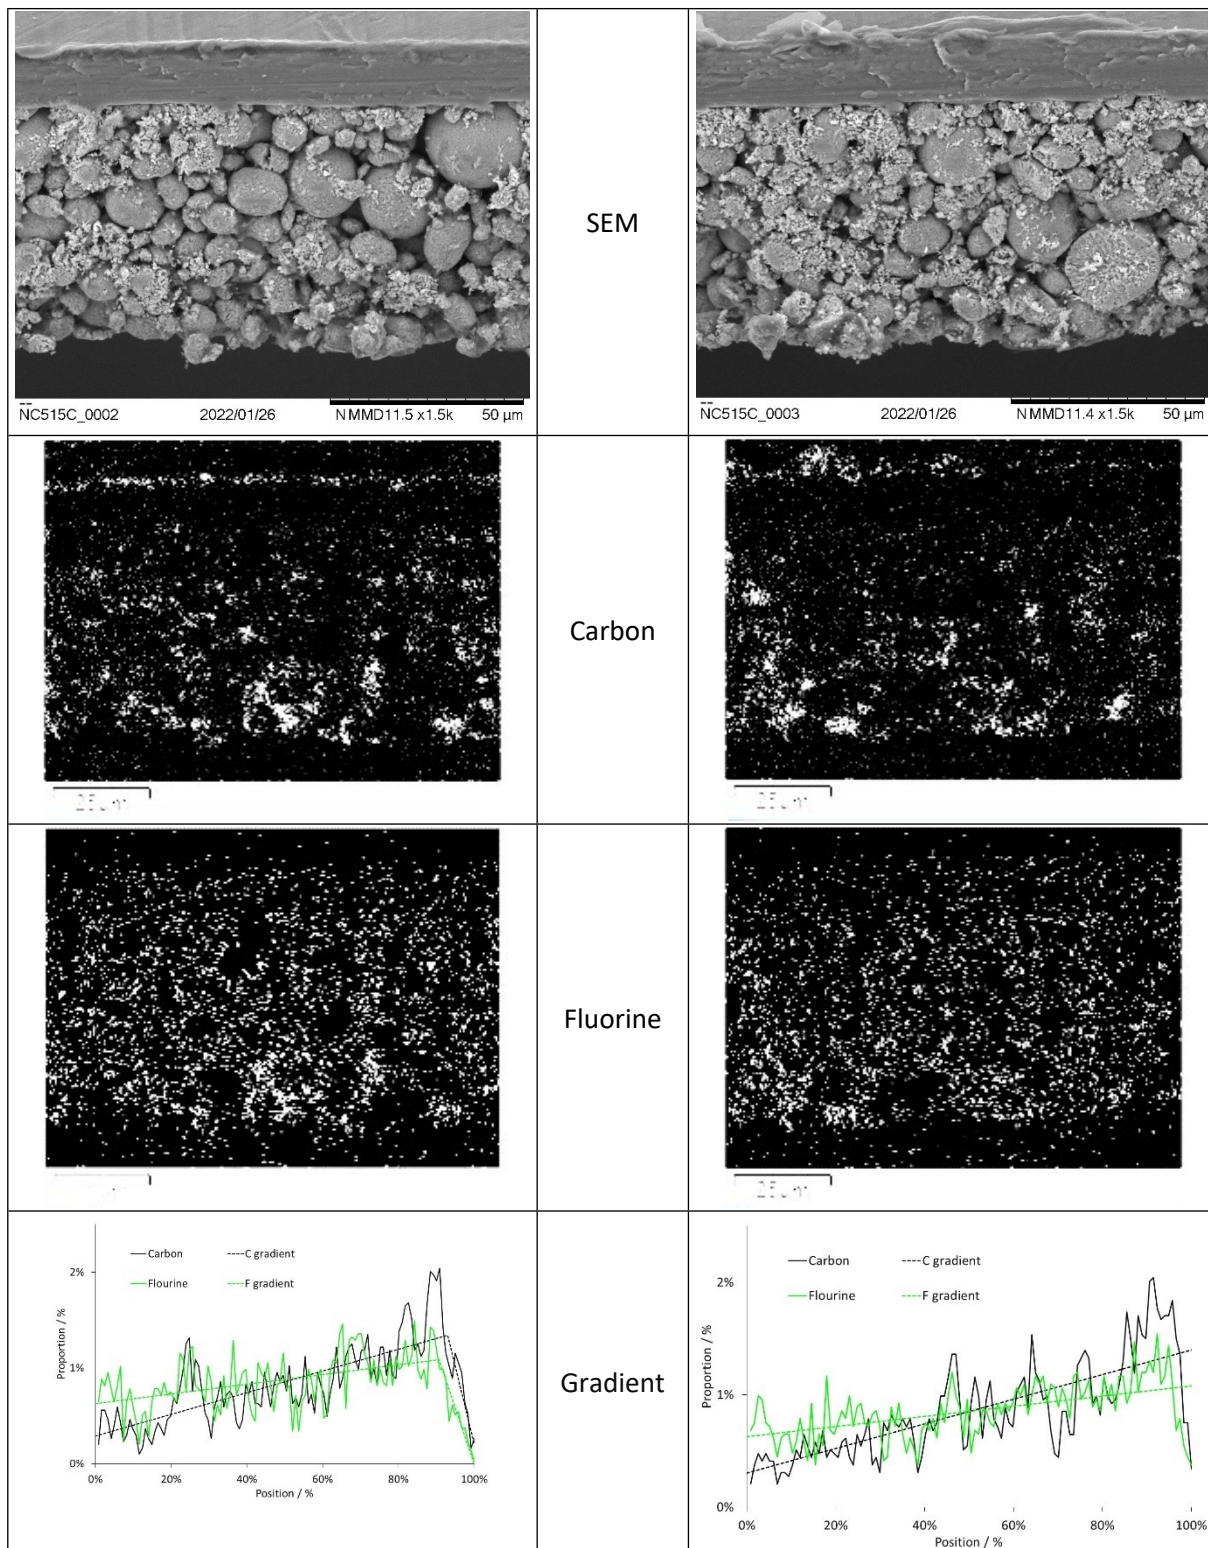

Figure S35. SEM Images And EDS Maps (515CA And 515CB)

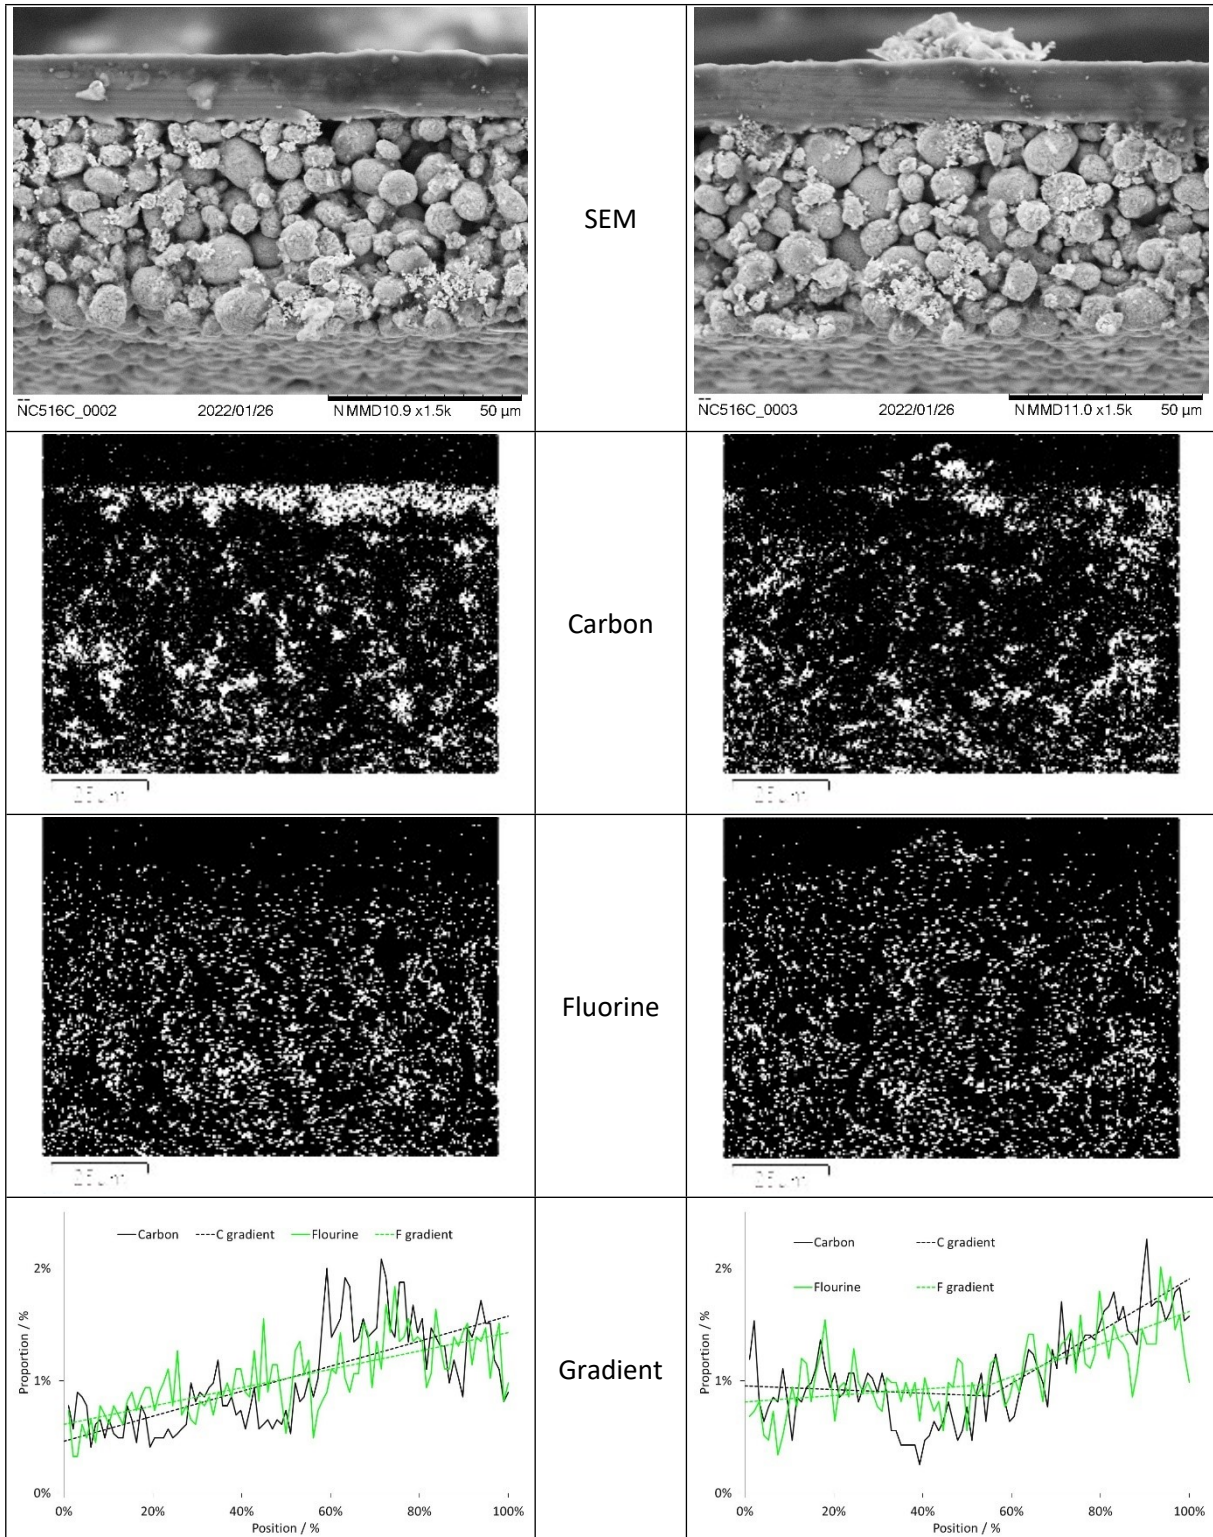

Figure S36. SEM Images And EDS Maps (516CA And 516CB)



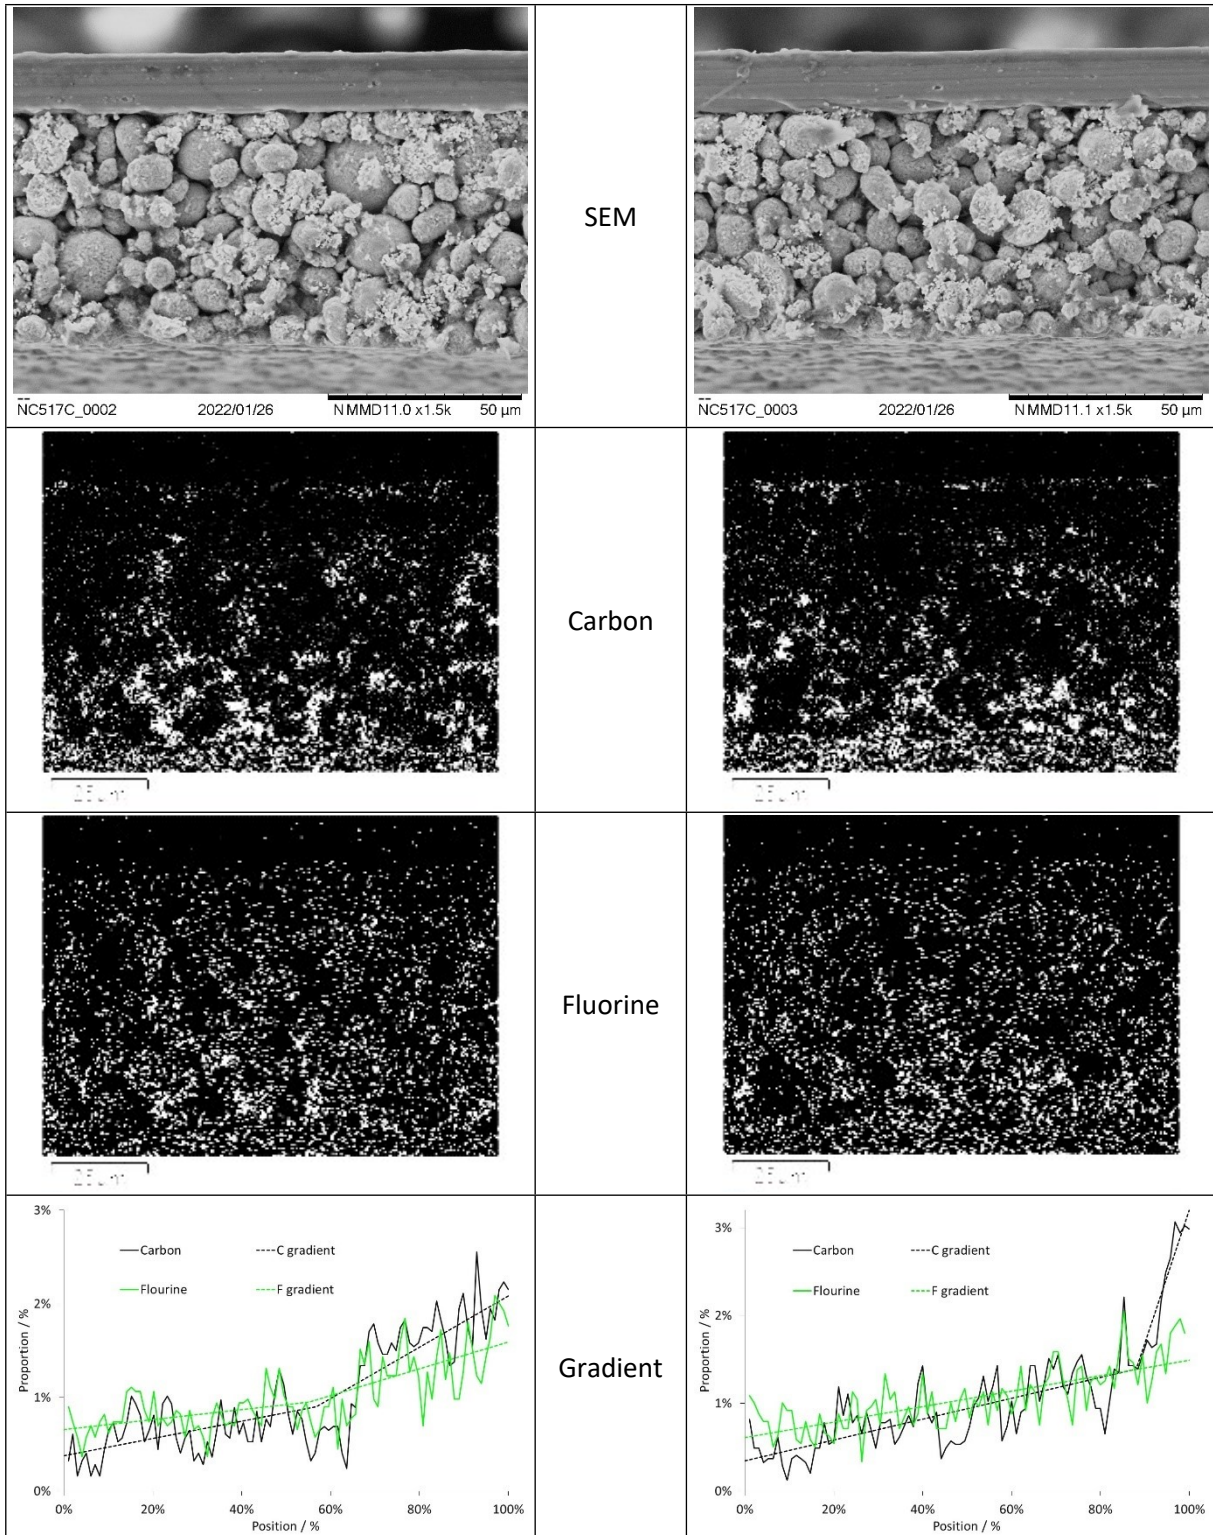

Figure S37. SEM Images And EDS Maps (517CA And 517CB)



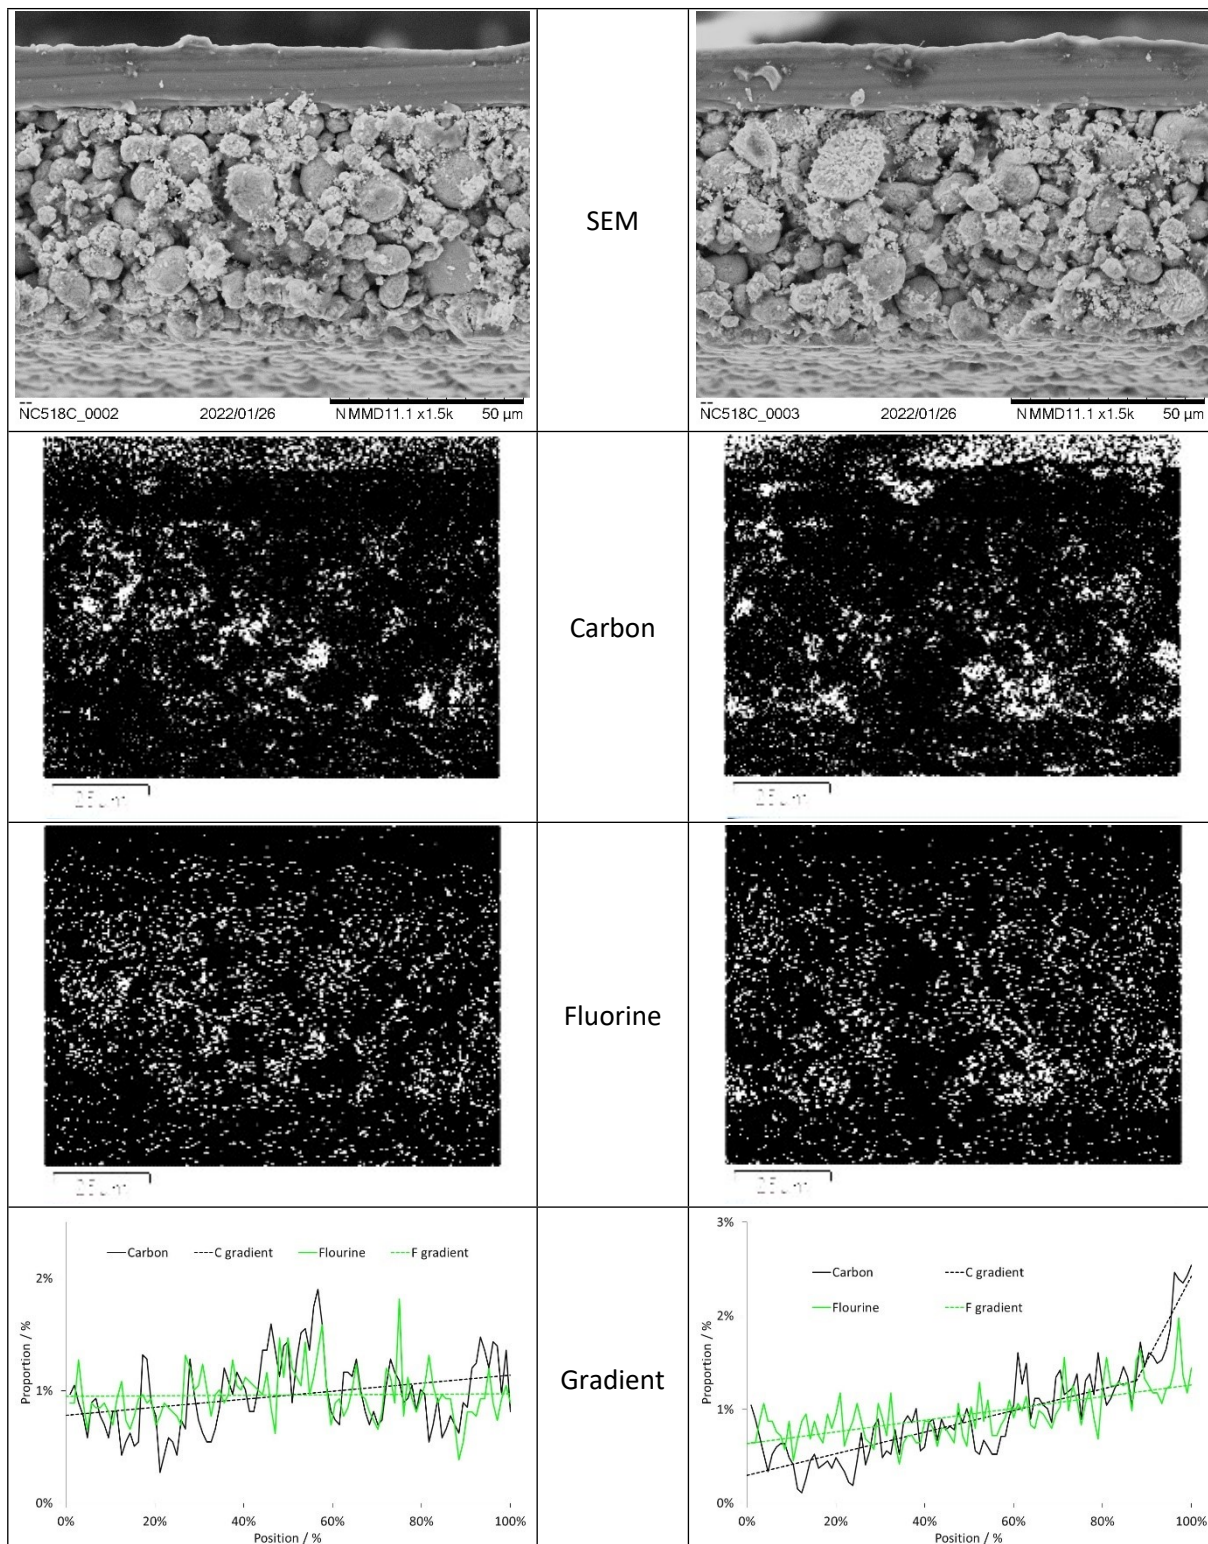

Figure S38. SEM Images And EDS Maps (518CA And 518CB)

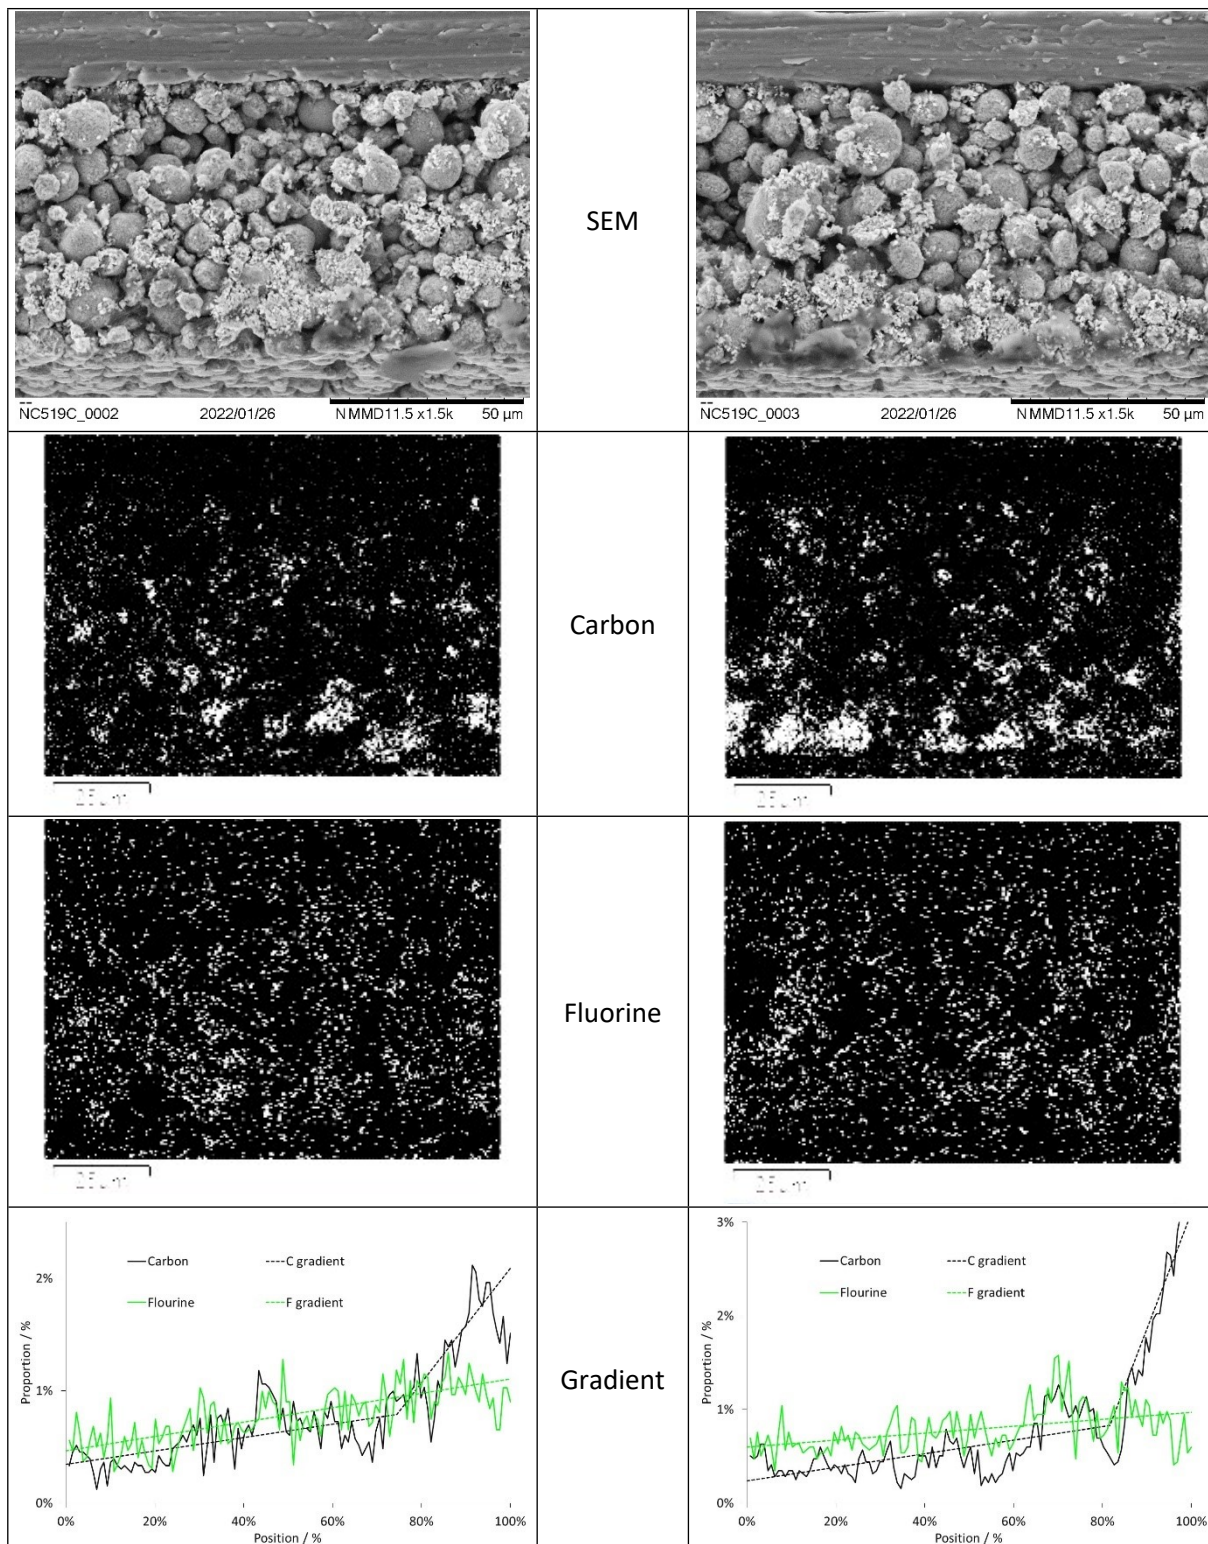

Figure S39. SEM Images And EDS Maps (519CA And 519CB)



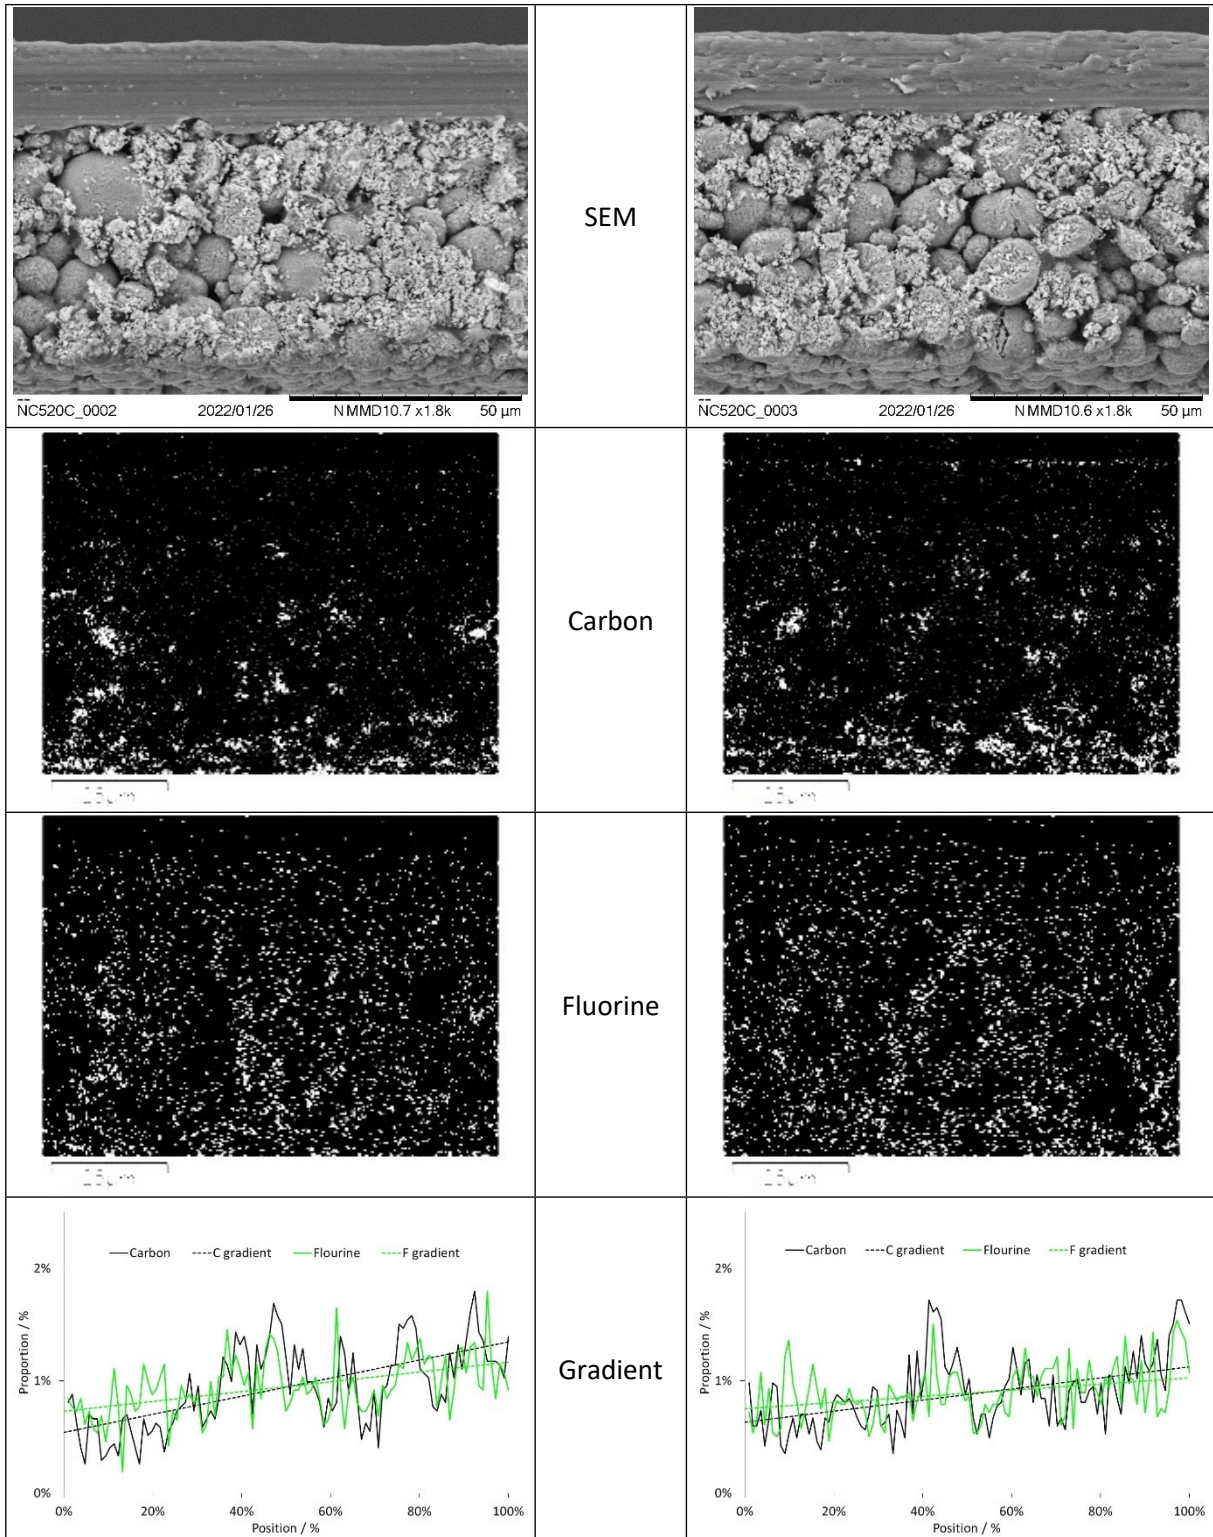

Figure S40. SEM Images And EDS Maps (520CA And 520CB)



| Uncalendered                                                                        |          | Calendered                                                                           |
|-------------------------------------------------------------------------------------|----------|--------------------------------------------------------------------------------------|
| 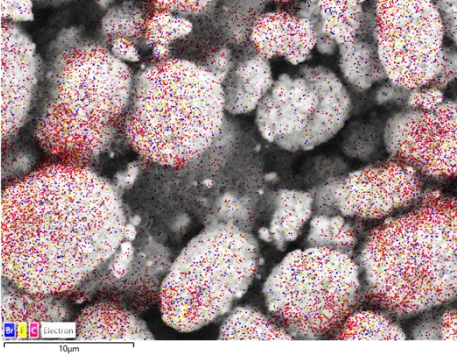   | SEM      |    |
|   | Carbon   |   |
|  | Oxygen   |  |
|  | Fluorine |  |

Figure S41. SEM Images And EDS Maps (NC601 Surface)

NB. For the calendered sample, the conductive carbon region blocks the oxygen signal from the NMC. However, for the uncalendered sample, the carbon spot does not appear, because the conductive carbon clump is below the surface.

### Anode DoE

Table S11. Test Matrix and Sample Identification (Anode DoE)

| Coating No. | Coating I.D. | Comma bar gap / um | Coating ratio / % |
|-------------|--------------|--------------------|-------------------|
| 6           | ANO5_06      | 190                | 130               |
| 11          | ANO5_11      | 177                | 144               |
| 8           | ANO5_08      | 177                | 116               |
| 2           | ANO5_02      | 145                | 150               |
| 1           | ANO5_01      | 145                | 130               |
| 5           | ANO5_05      | 145                | 130               |
| 7           | ANO5_07      | 145                | 130               |
| 10          | ANO5_10      | 145                | 130               |
| 12          | ANO5_12      | 145                | 130               |
| 4           | ANO5_04      | 145                | 110               |
| 3           | ANO5_03      | 113                | 144               |
| 9           | ANO5_09      | 113                | 116               |
| 13          | ANO5_13      | 100                | 130               |

Table S12. Repeat Spatial Autocorrelation Measurements On Anode DoE Samples

| Coating | Join Counting |       | Moran I Score |       |
|---------|---------------|-------|---------------|-------|
|         | Mean          | S. D. | Mean          | S. D. |
| ANO5_01 | 35.5          | 4.6   | 0.293         | 0.005 |
| ANO5_02 | 41.7          | 6.9   | 0.291         | 0.008 |
| ANO5_06 | 42.6          | 5.5   | 0.287         | 0.004 |
| Repeats | 35.5          | 4.5   | 0.284         | 0.008 |

NB. The “repeat” measurements were for samples with a blade gap of 145 um and a coating ratio of 130 %.

Table S13. Summary Of Results From Electrochemical Tests (Anode DoE)

| Coating ID | Coat Weight<br>/ gsm | ASI Resistance<br>/ $\Omega$ cm | Ratio 2C : 0.2C<br>/ % |
|------------|----------------------|---------------------------------|------------------------|
| ANO5_01    | 103                  | 43.0                            | 92.9                   |
| ANO5_02    | 115                  | 62.4                            | 103.1                  |
| ANO5_03    | 89                   | 62.7                            | 100.2                  |
| ANO5_04    | 87                   | 47.0                            | 96.8                   |
| ANO5_05    | 103                  | 39.1                            | 99.3                   |
| ANO5_06    | 131                  | 39.5                            | 99.5                   |
| ANO5_07    | 102                  | 50.1                            | 93.3                   |
| ANO5_08    | 107                  | 36.4                            | 96.2                   |
| ANO5_09    | 74                   | 71.3                            | 98.5                   |
| ANO5_10    | 102                  | 42.9                            | 100.5                  |
| ANO5_11    | 134                  | 46.7                            | 93.7                   |
| ANO5_12    | 101                  | 53.4                            | 98.2                   |
| ANO5_13    | 75                   | 53.0                            | 99.1                   |

Table S14. Correlation Coefficients From Linear Regression (Anode DoE)

| Figure | X Parameter                   | Y Parameter                 | R <sup>2</sup> (fluorine) |
|--------|-------------------------------|-----------------------------|---------------------------|
| 9A     | Surface Coverage              | Join Count Z <sub>1-1</sub> | 0.0476                    |
| 9B     | Coat Weight                   | Join Count Z <sub>1-1</sub> | 0.1983                    |
| 9C     | Minimum ASI                   | Join Count Z <sub>1-1</sub> | 0.0162                    |
| 9D     | Minimum ASI                   | Moran I Score               | 0.0463                    |
| 9F     | Comma Bar Gap x Coating Ratio | Sodium Gradient             | 0.0138                    |



Table S15. Join Count Analysis Of Sodium EDS Maps (Anode DoE)

| Sodium   | Coverage       | Experiment / % |       |       | Join Count Z Score |       |       |
|----------|----------------|----------------|-------|-------|--------------------|-------|-------|
|          | Proportion / % | 1 – 1          | 0 – 1 | 0 – 0 | 1 – 1              | 0 – 1 | 0 - 0 |
| ANO5_01A | 3.95           | 0.46           | 7.0   | 92.5  | 28.0               | -10.9 | 5.8   |
| ANO5_01B | 3.97           | 0.54           | 6.8   | 92.6  | 35.7               | -13.4 | 7.0   |
| ANO5_01C | 3.05           | 0.32           | 5.4   | 94.2  | 40.4               | -13.0 | 5.2   |
| ANO5_01D | 3.98           | 0.56           | 6.9   | 92.6  | 37.7               | -13.1 | 6.4   |
| ANO5_02  | 2.02           | 0.21           | 3.6   | 96.2  | 37.8               | -10.2 | 4.4   |
| ANO5_02A | 1.96           | 0.23           | 3.5   | 96.3  | 40.3               | -13.2 | 6.9   |
| ANO5_02B | 2.96           | 0.37           | 5.2   | 94.5  | 49.1               | -22.2 | 13.2  |
| ANO5_02C | 2.99           | 0.38           | 5.2   | 94.4  | 49.6               | -20.6 | 11.4  |
| ANO5_02D | 1.99           | 0.19           | 3.6   | 96.2  | 31.6               | - 8.9 | 4.0   |
| ANO5_03  | 3.97           | 0.54           | 6.8   | 92.7  | 35.8               | -14.0 | 7.5   |
| ANO5_04  | 3.98           | 0.53           | 6.8   | 92.7  | 34.7               | -13.6 | 7.4   |
| ANO5_05  | 3.97           | 0.49           | 6.9   | 92.6  | 30.9               | -11.7 | 6.1   |
| ANO5_06  | 2.98           | 0.36           | 5.2   | 94.4  | 46.8               | -20.0 | 11.4  |
| ANO5_06A | 3.04           | 0.36           | 5.3   | 94.3  | 47.2               | -16.4 | 7.4   |
| ANO5_06B | 3.03           | 0.36           | 5.4   | 94.3  | 47.1               | -15.4 | 6.4   |
| ANO5_06C | 2.96           | 0.31           | 5.3   | 94.4  | 37.4               | -17.5 | 10.7  |
| ANO5_06D | 3.94           | 0.53           | 6.8   | 92.7  | 34.7               | -14.1 | 7.8   |
| ANO5_07  | 4.04           | 0.61           | 6.9   | 92.5  | 42.6               | -13.1 | 5.6   |
| ANO5_08  | 4.05           | 0.55           | 7.0   | 92.5  | 36.1               | -10.8 | 4.5   |
| ANO5_09  | 3.99           | 0.57           | 6.8   | 92.6  | 38.8               | -13.4 | 6.5   |
| ANO5_10  | 3.98           | 0.49           | 7.0   | 92.5  | 30.5               | -11.3 | 5.8   |
| ANO5_11  | 3.05           | 0.36           | 5.3   | 94.3  | 46.7               | -16.1 | 7.2   |
| ANO5_12  | 3.99           | 0.54           | 6.9   | 92.6  | 35.8               | -13.0 | 6.6   |
| ANO5_13  | 4.01           | 0.56           | 6.8   | 92.6  | 37.1               | -13.7 | 7.1   |

Table S16. Moran Analysis Of EDS Maps (Anode DoE)

| Sample   | Sodium    |      |       |
|----------|-----------|------|-------|
|          | Threshold | Mean | Moran |
| ANO5_01A | 42        | 4.9  | 0.289 |
| ANO5_01B | 42        | 4.6  | 0.301 |
| ANO5_01C | 40        | 3.6  | 0.292 |
| ANO5_01D | 36        | 3.8  | 0.289 |
| ANO5_02  | 36        | 2.0  | 0.282 |
| ANO5_02A | 34        | 1.9  | 0.300 |
| ANO5_02B | 34        | 2.8  | 0.300 |
| ANO5_02C | 35        | 2.8  | 0.282 |
| ANO5_02D | 39        | 2.2  | 0.288 |
| ANO5_03  | 36        | 3.9  | 0.288 |
| ANO5_04  | 37        | 4.0  | 0.278 |
| ANO5_05  | 39        | 4.3  | 0.281 |
| ANO5_06  | 36        | 3.0  | 0.289 |
| ANO5_06A | 39        | 3.3  | 0.289 |
| ANO5_06B | 36        | 3.0  | 0.292 |
| ANO5_06C | 39        | 3.3  | 0.286 |
| ANO5_06D | 35        | 3.8  | 0.281 |
| ANO5_07  | 31        | 3.3  | 0.283 |
| ANO5_08  | 35        | 3.8  | 0.282 |
| ANO5_09  | 33        | 3.5  | 0.288 |
| ANO5_10  | 38        | 4.2  | 0.273 |
| ANO5_11  | 38        | 3.2  | 0.290 |
| ANO5_12  | 37        | 4.0  | 0.296 |
| ANO5_13  | 37        | 4.1  | 0.291 |

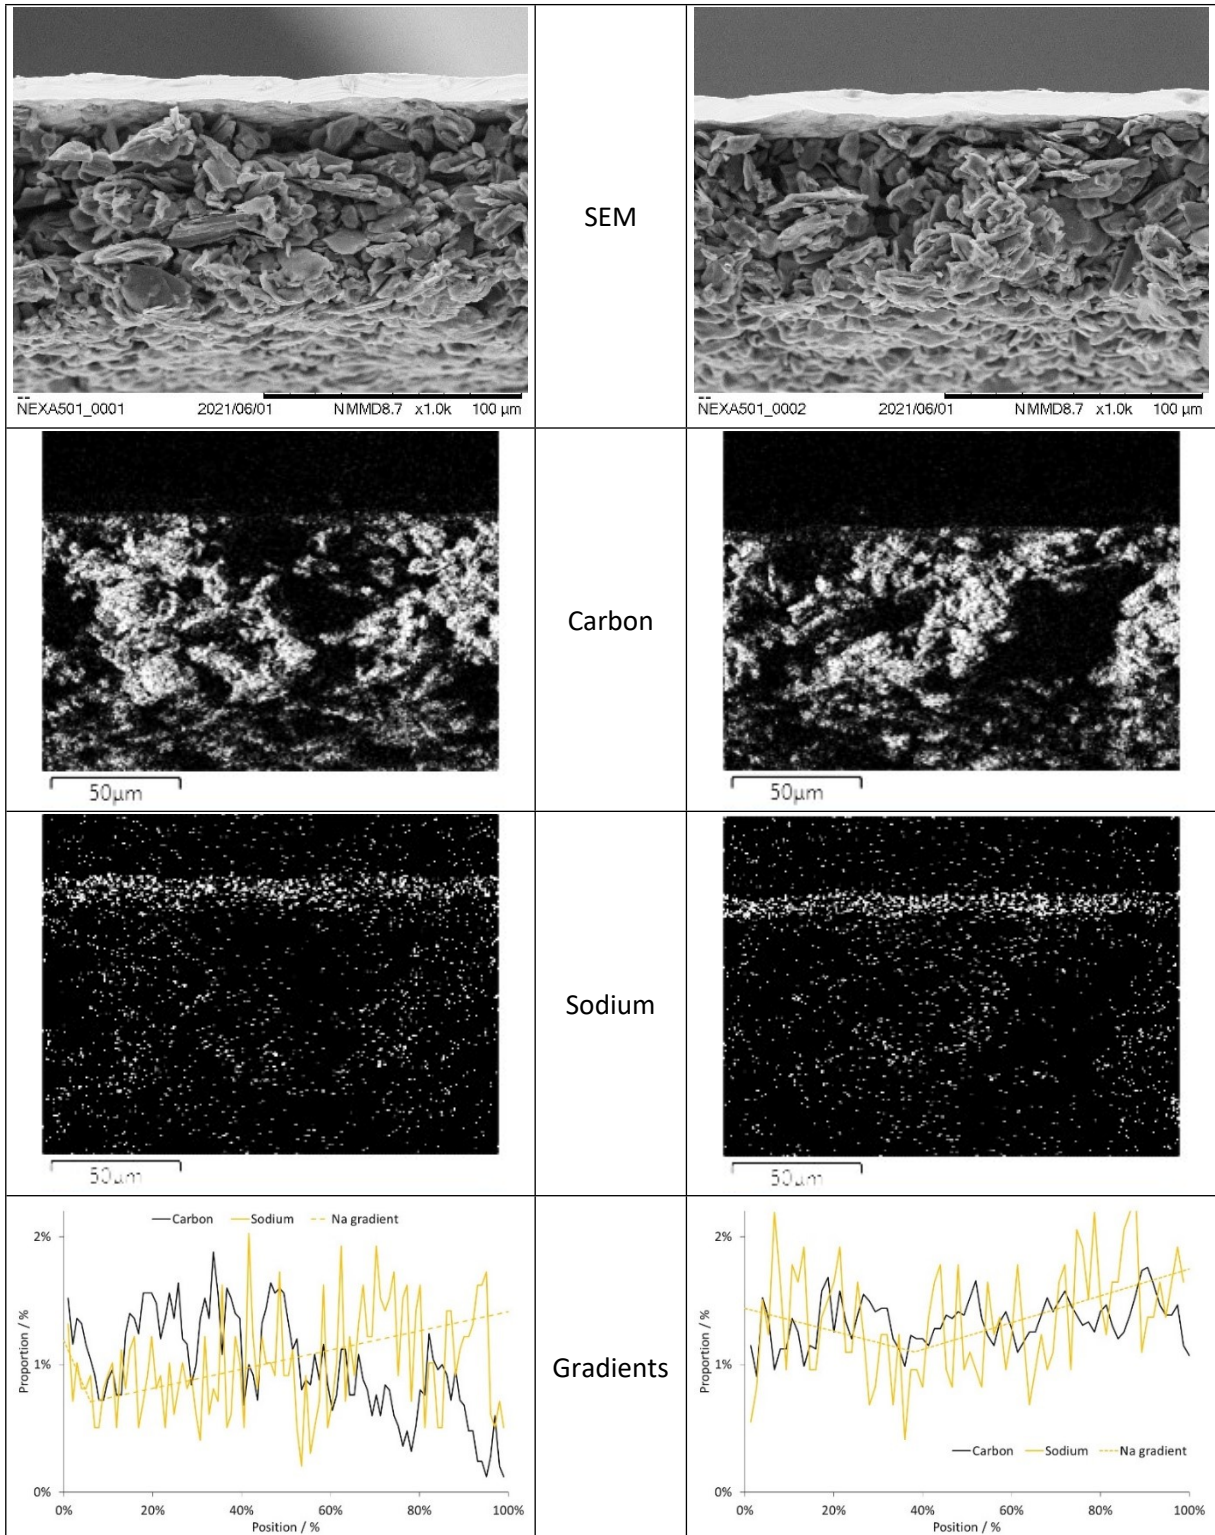

Figure S42. SEM Images And EDS Maps For Anode DoE (5\_01A And 5\_1B)



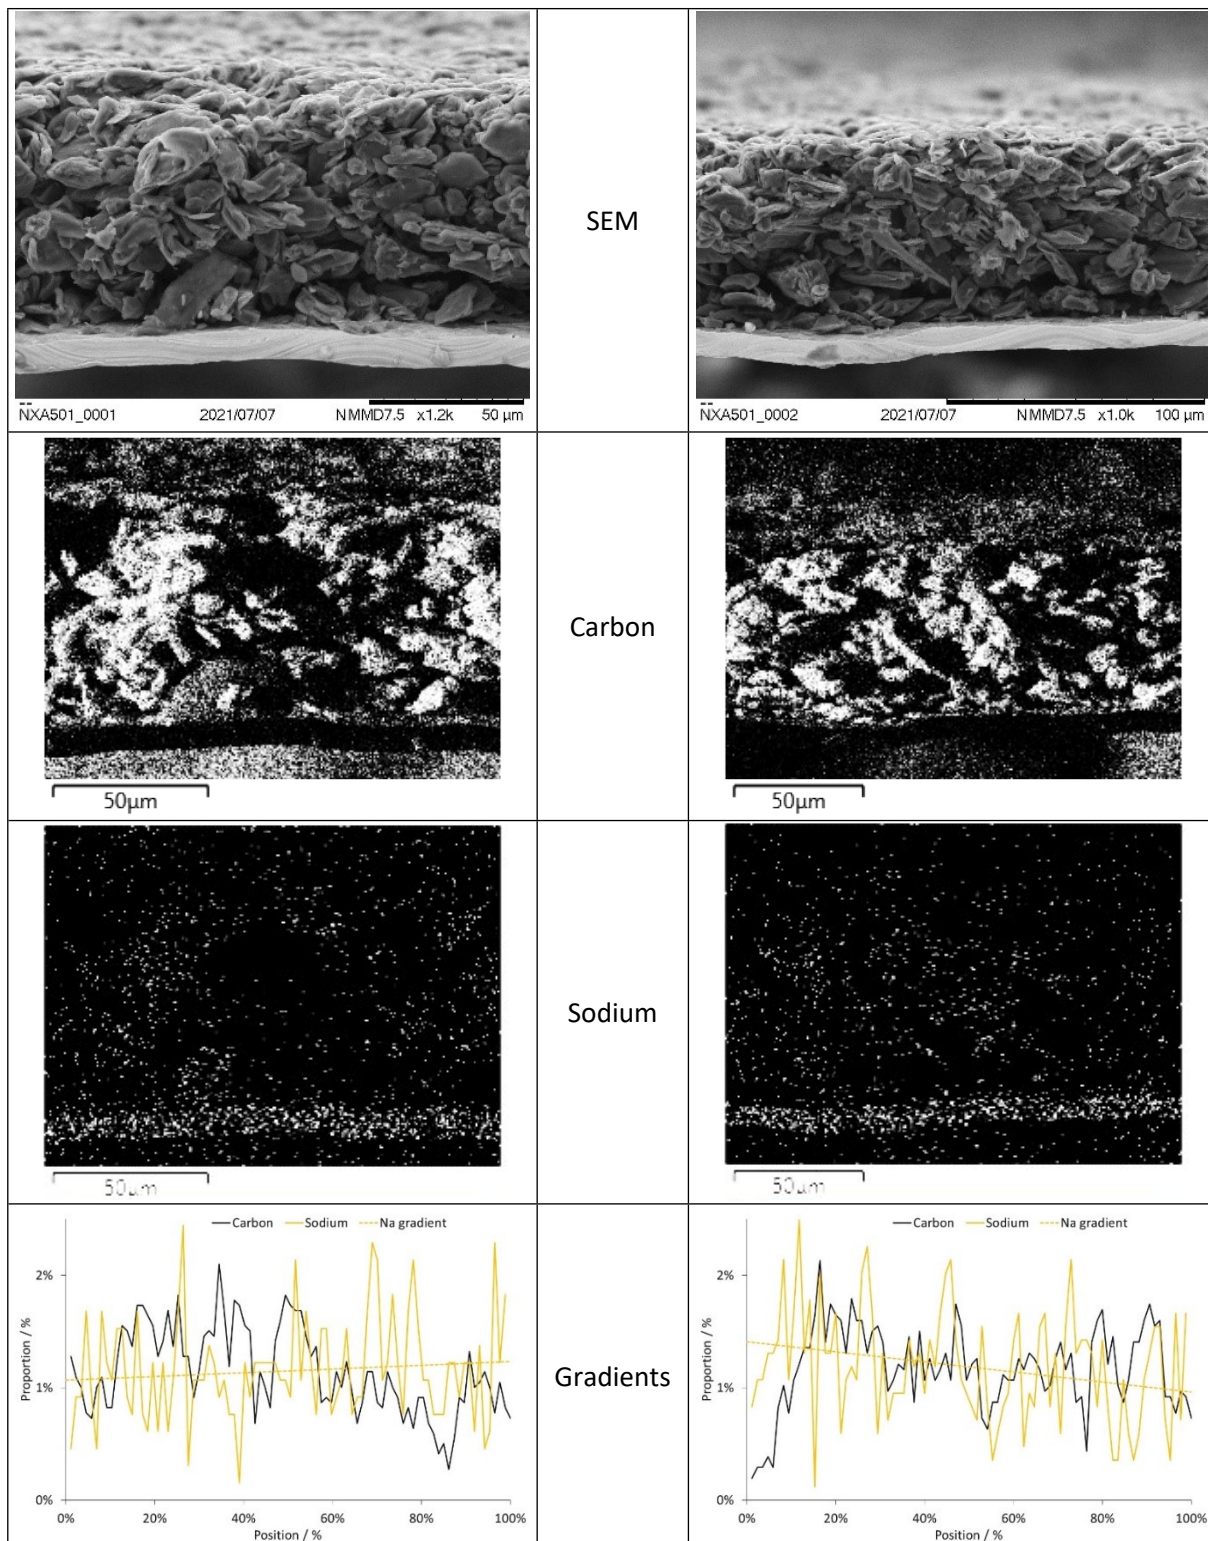

Figure S43. SEM Images And EDS Maps For Anode DoE (5\_01C And 5\_1D)

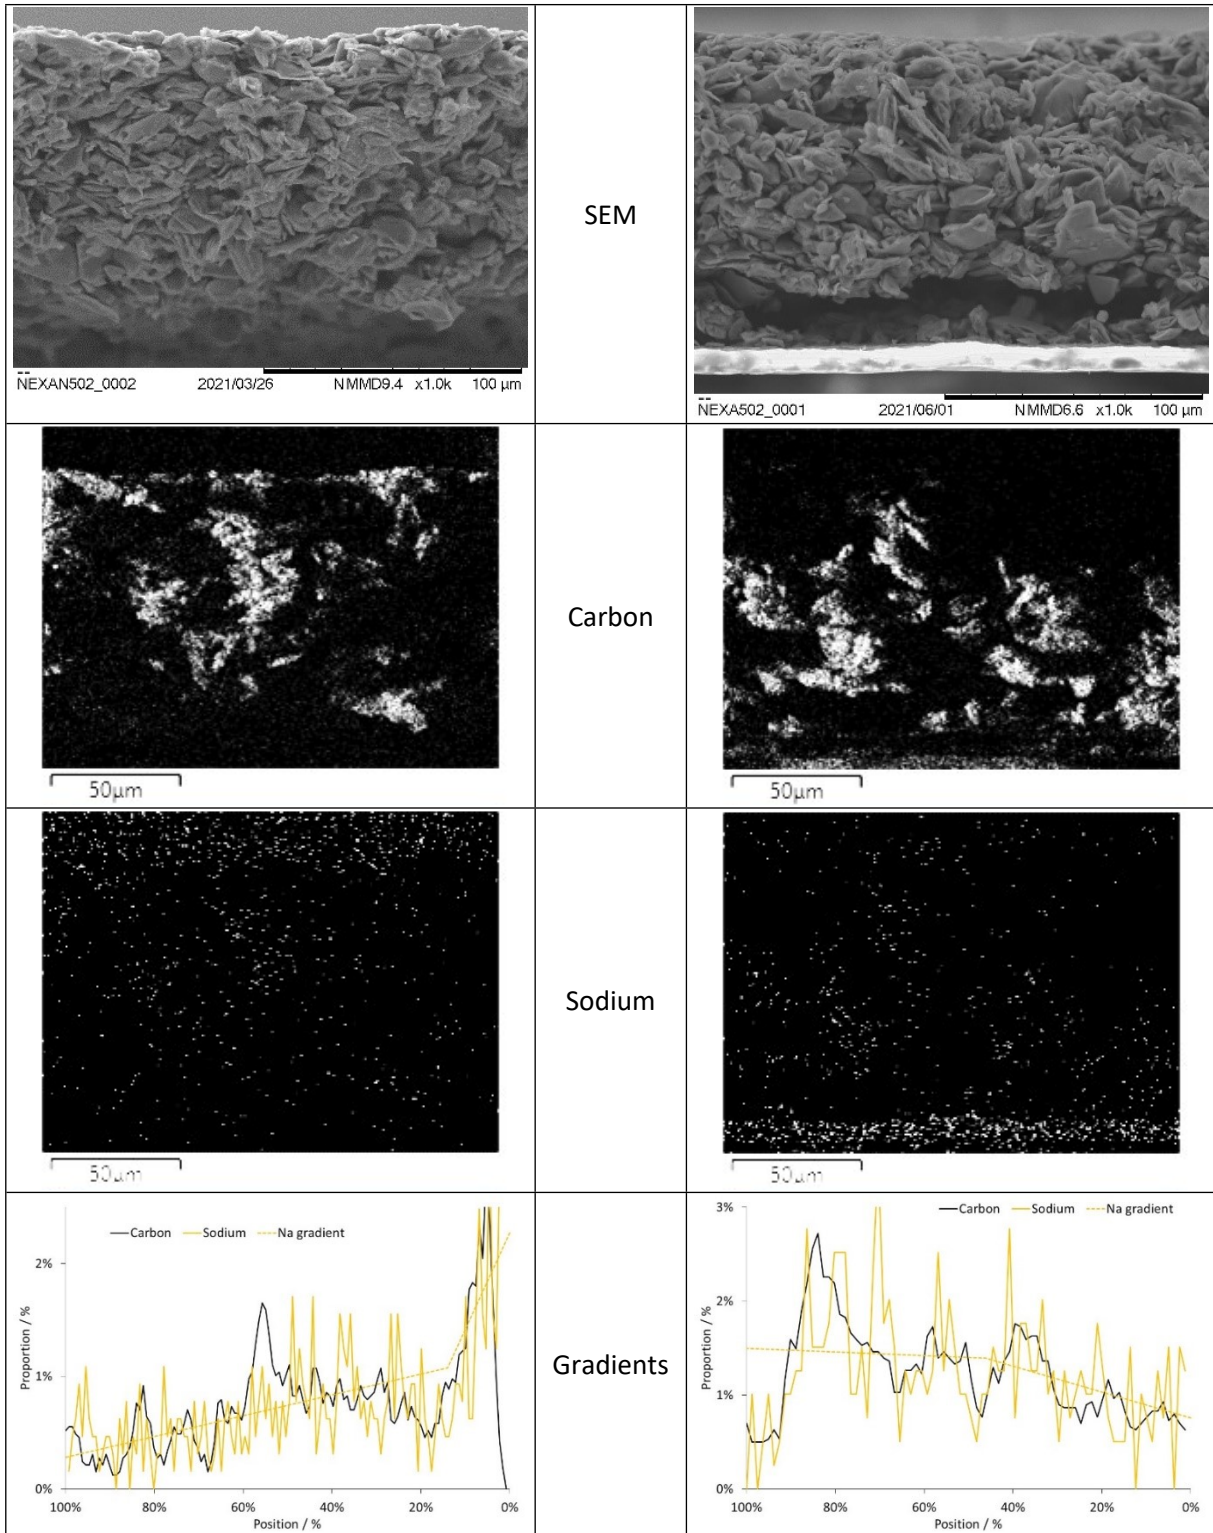

Figure S44. SEM Images And EDS Maps For Anode DoE (5\_02 And 5\_02A)



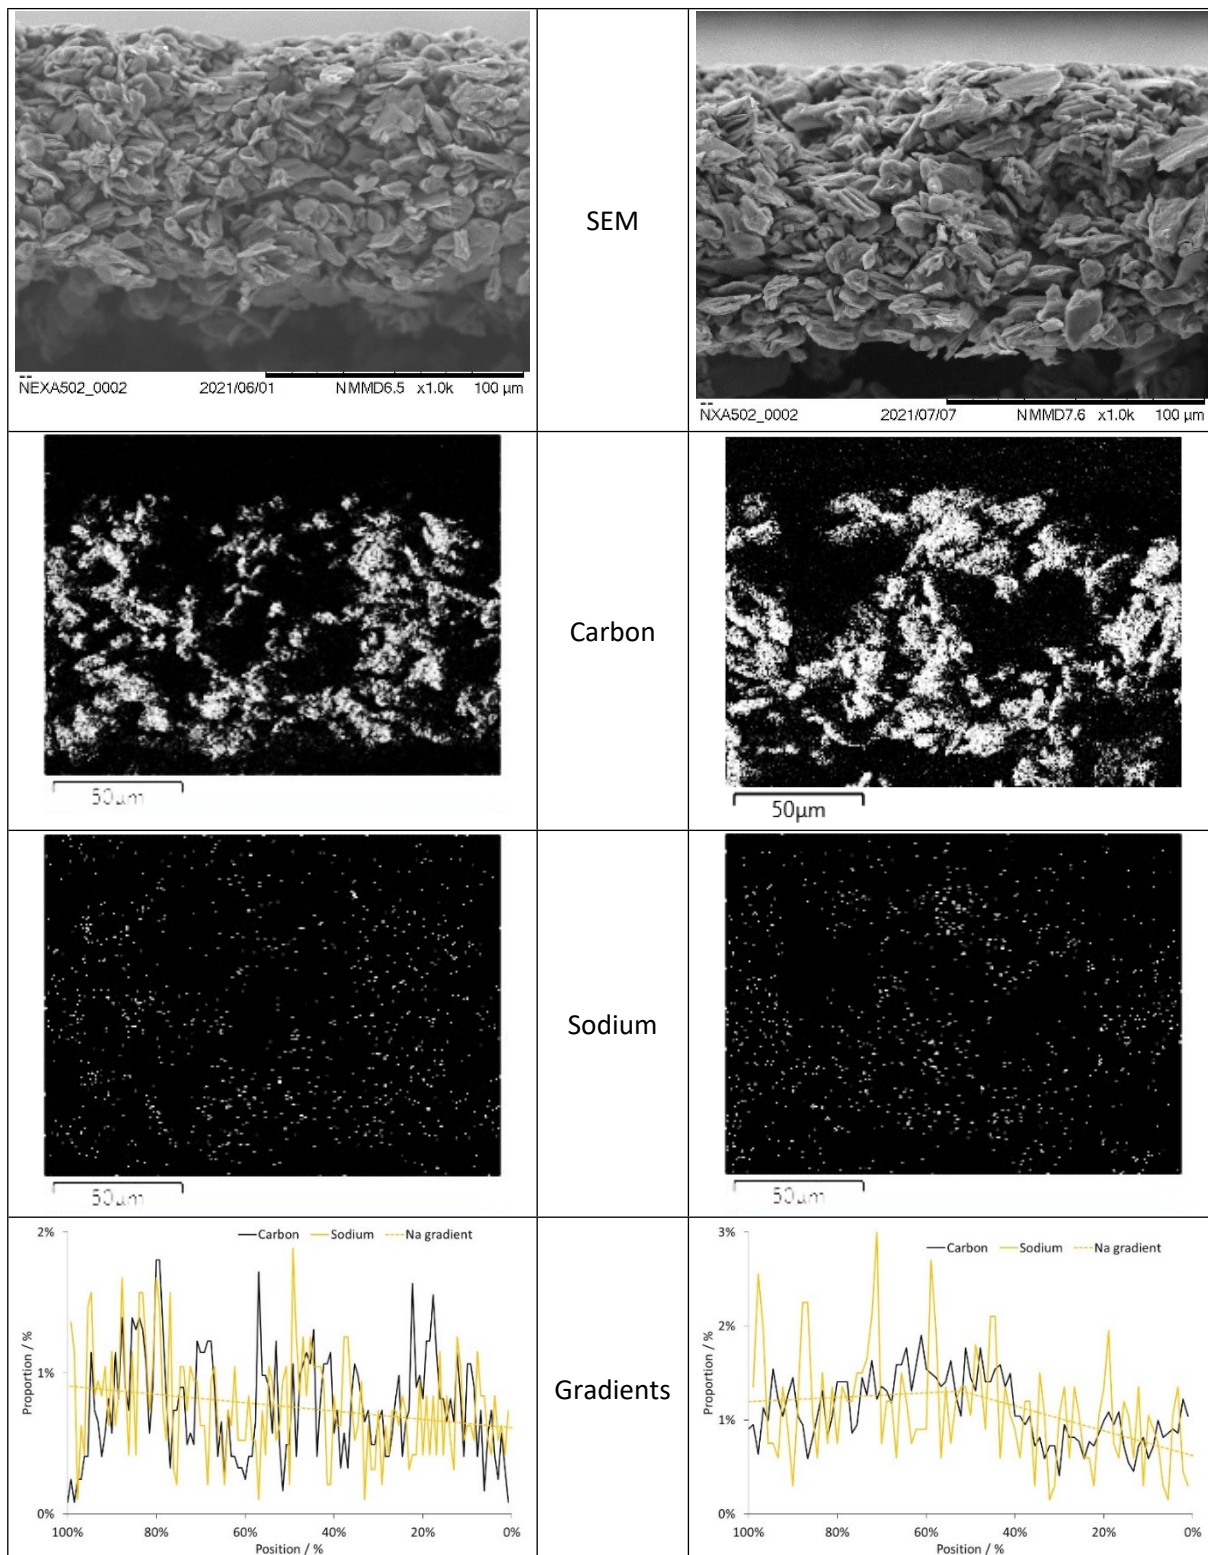

Figure S45. SEM Images And EDS Maps For Anode DoE (5\_02B And 5\_02C)



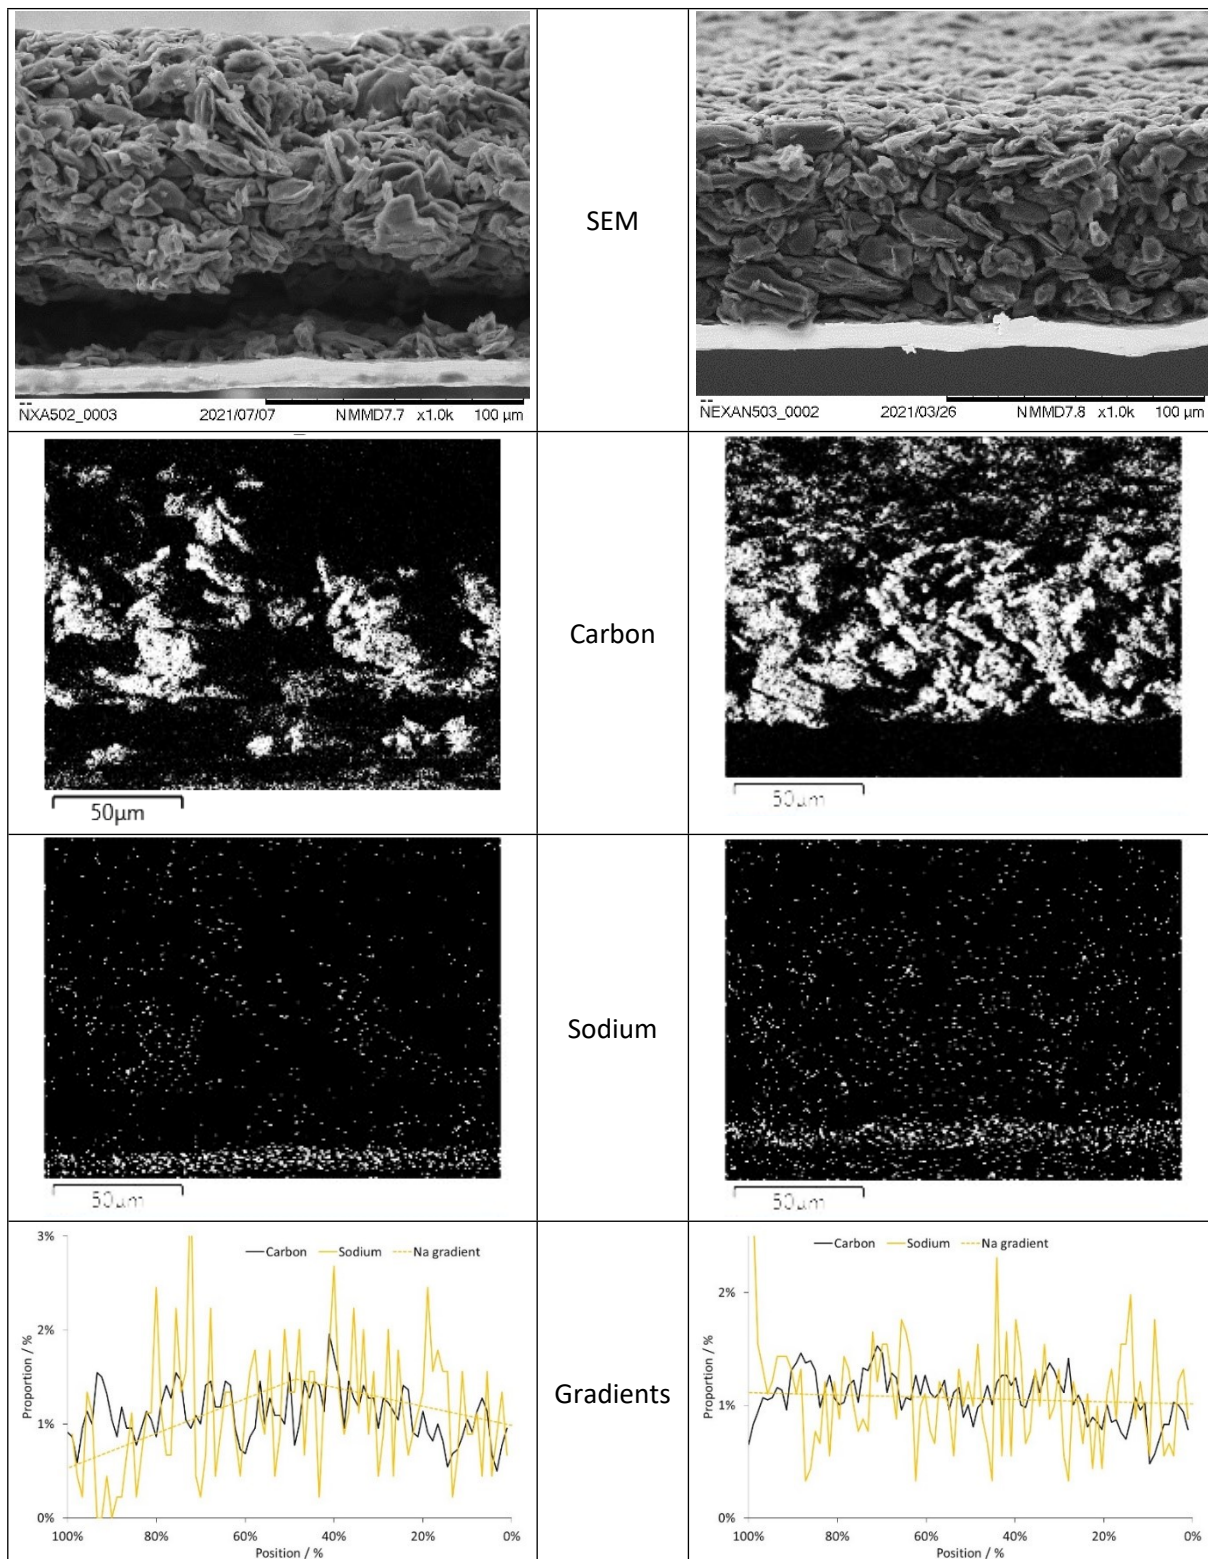

Figure S46. SEM Images And EDS Maps For Anode DoE (5\_02D And 5\_03)

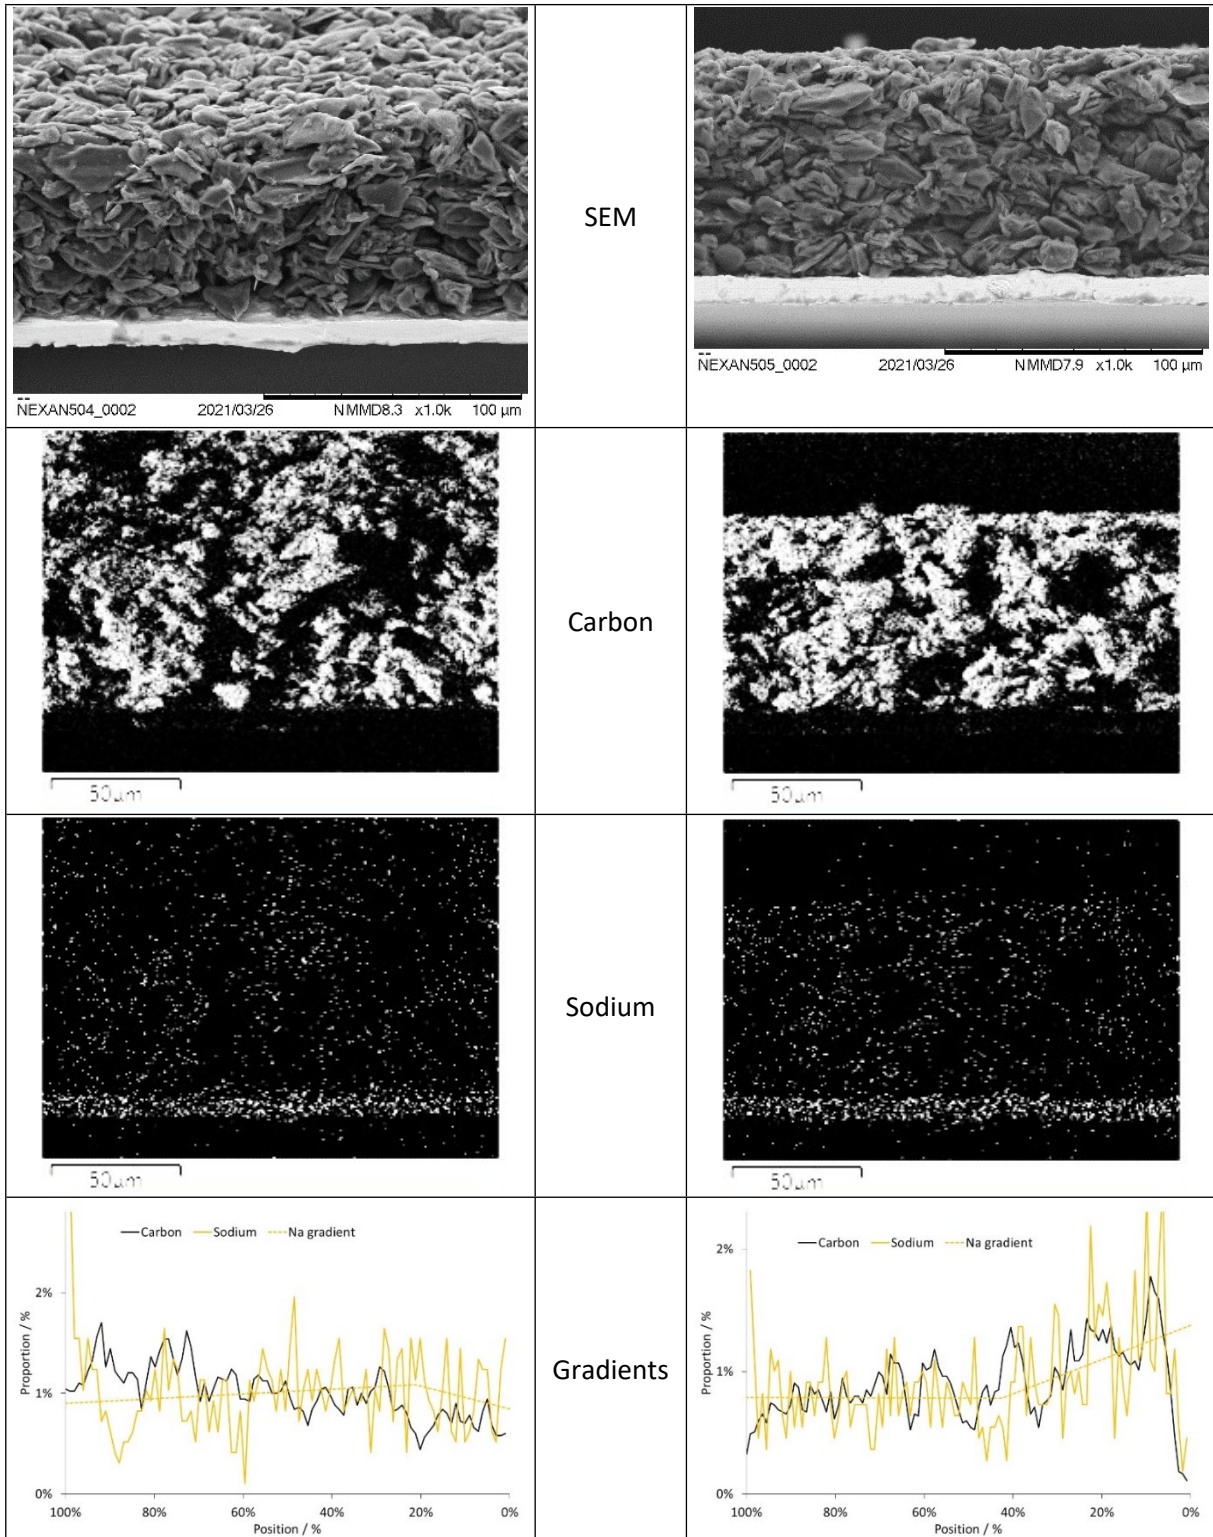

Figure S47. SEM Images And EDS Maps For Anode DoE (5\_04 And 5\_05)



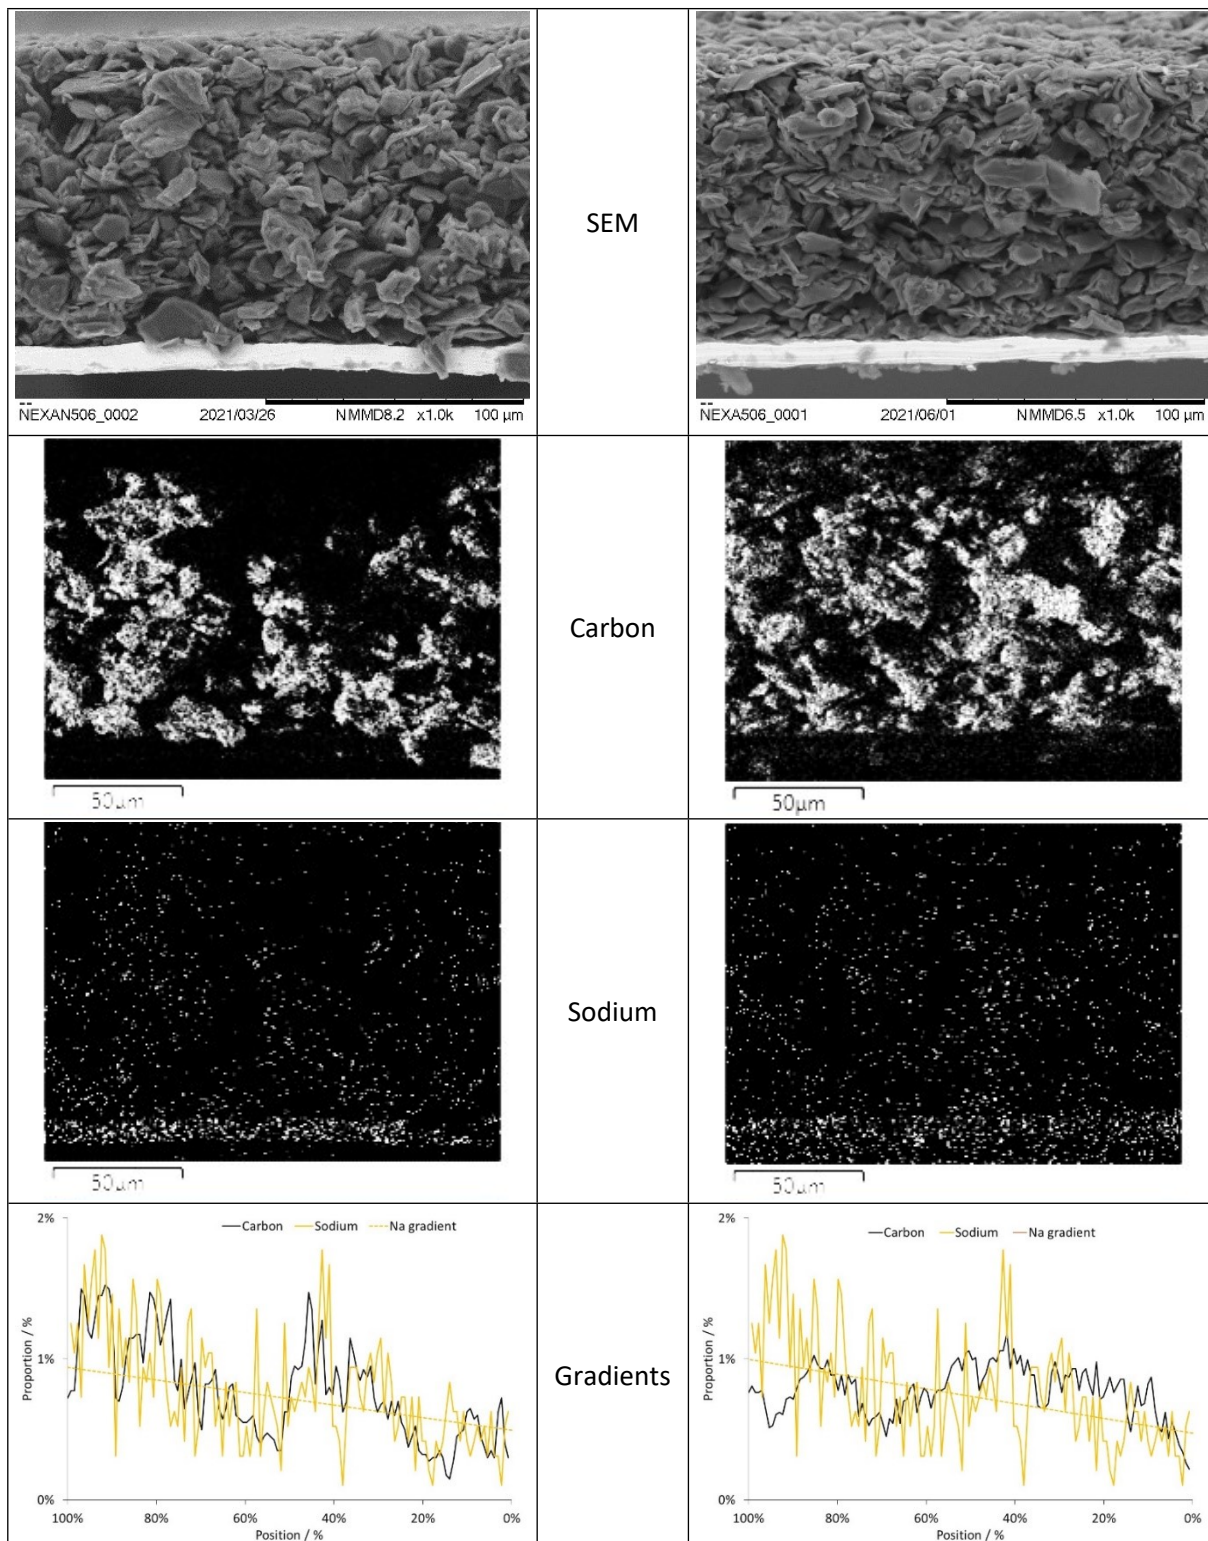

Figure S48. SEM Images And EDS Maps For Anode DoE (5\_06 And 5\_06A)



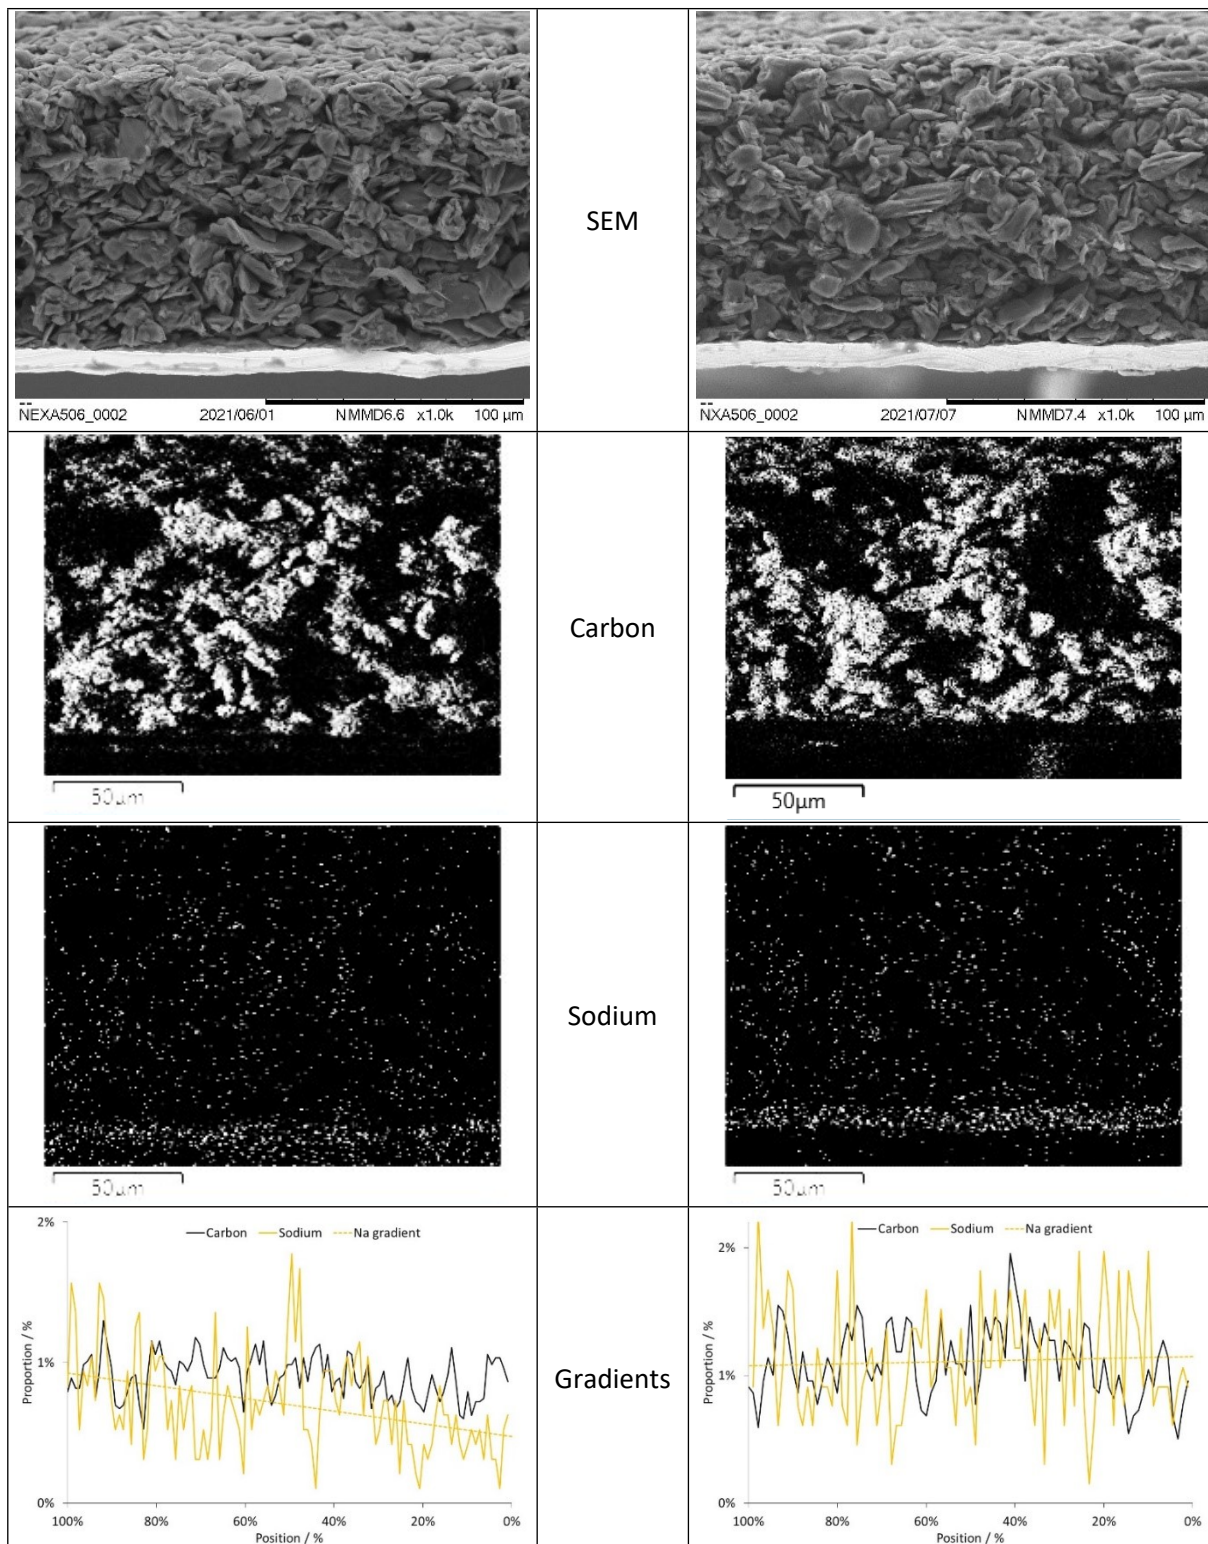

Figure S49. SEM Images And EDS Maps For Anode DoE (5\_06B And 5\_06C)

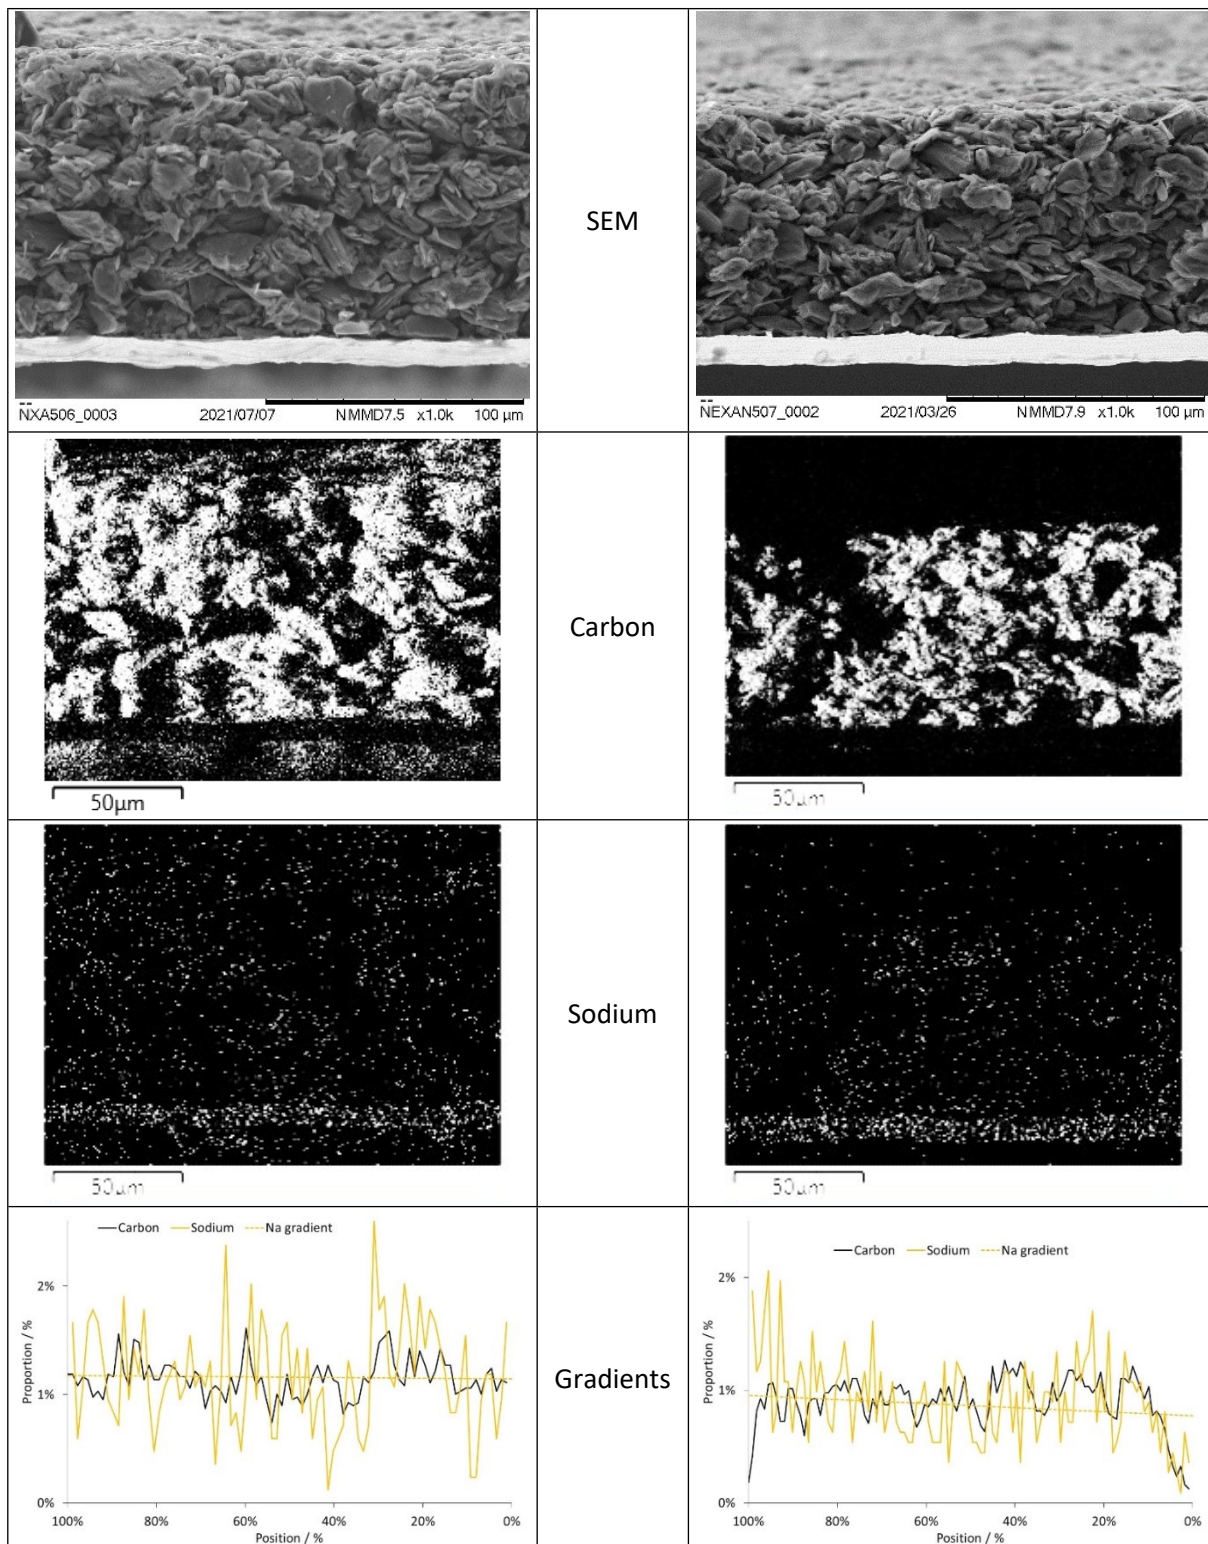

Figure S50. SEM Images And EDS Maps For Anode DoE (5\_06D And 5\_07)



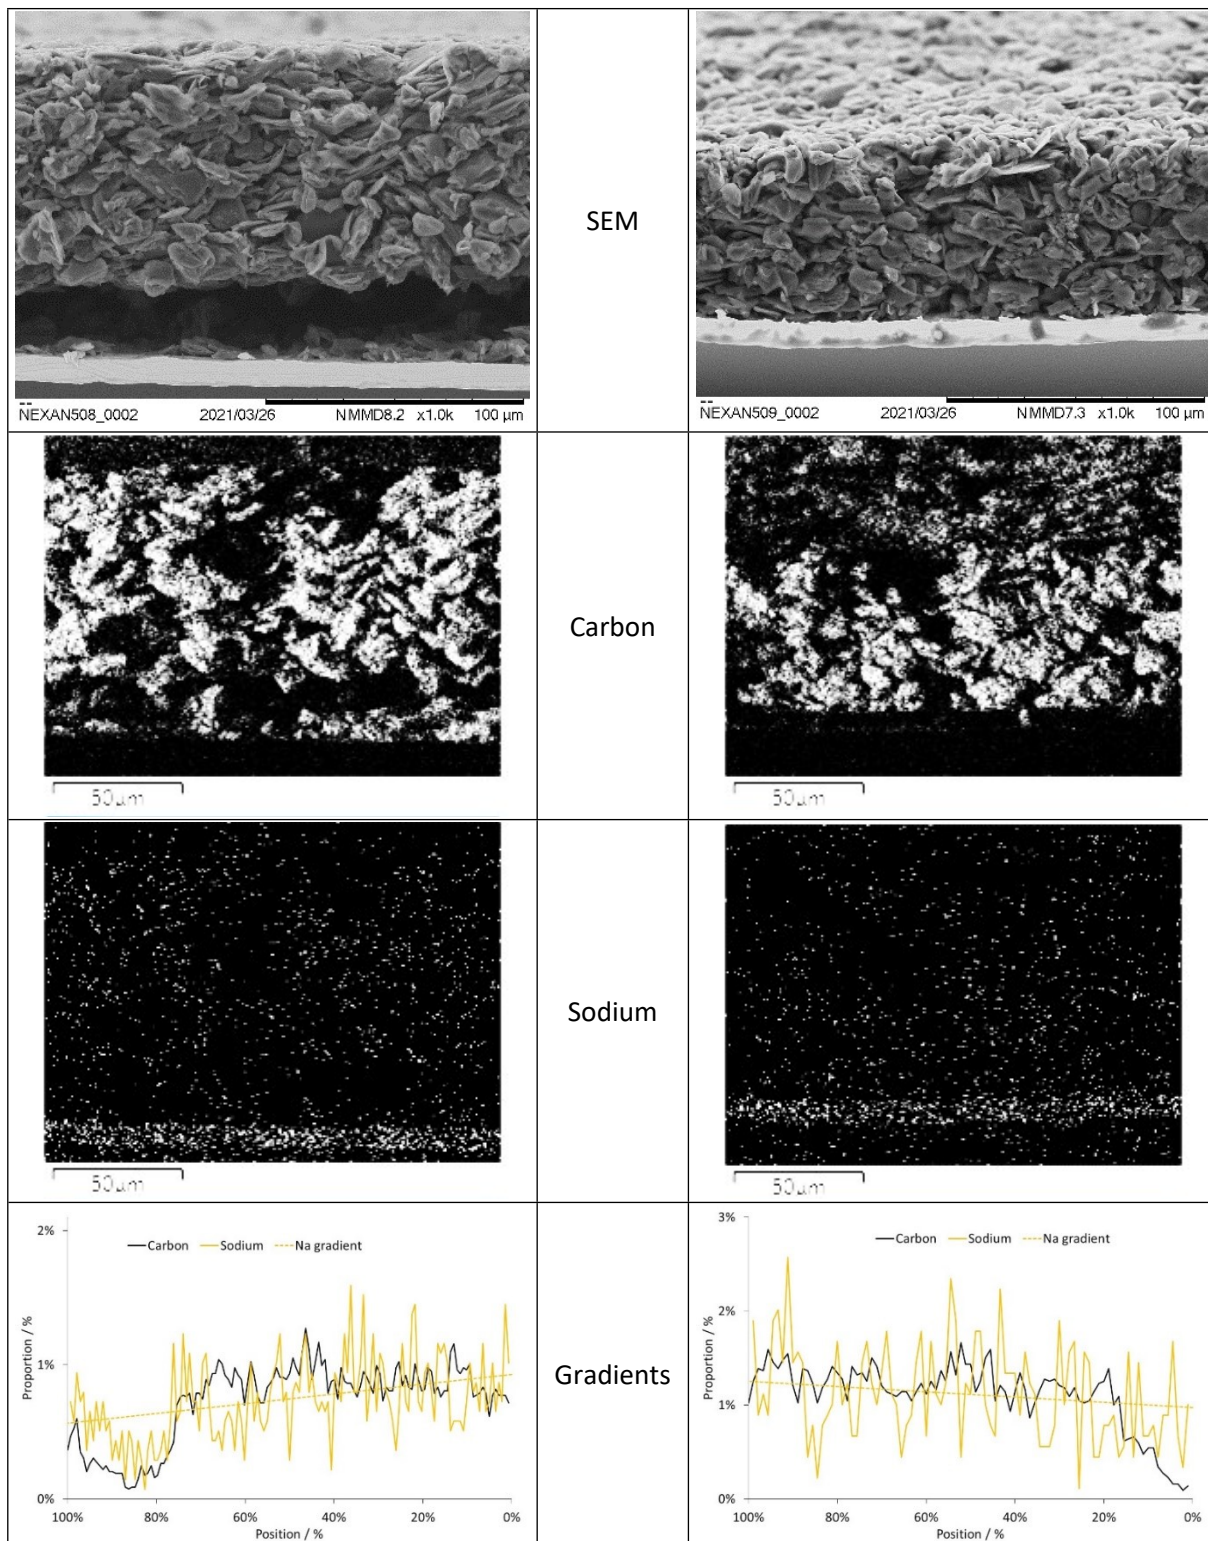

Figure S51. SEM Images And EDS Maps For Anode DoE (5\_08 And 5\_09)



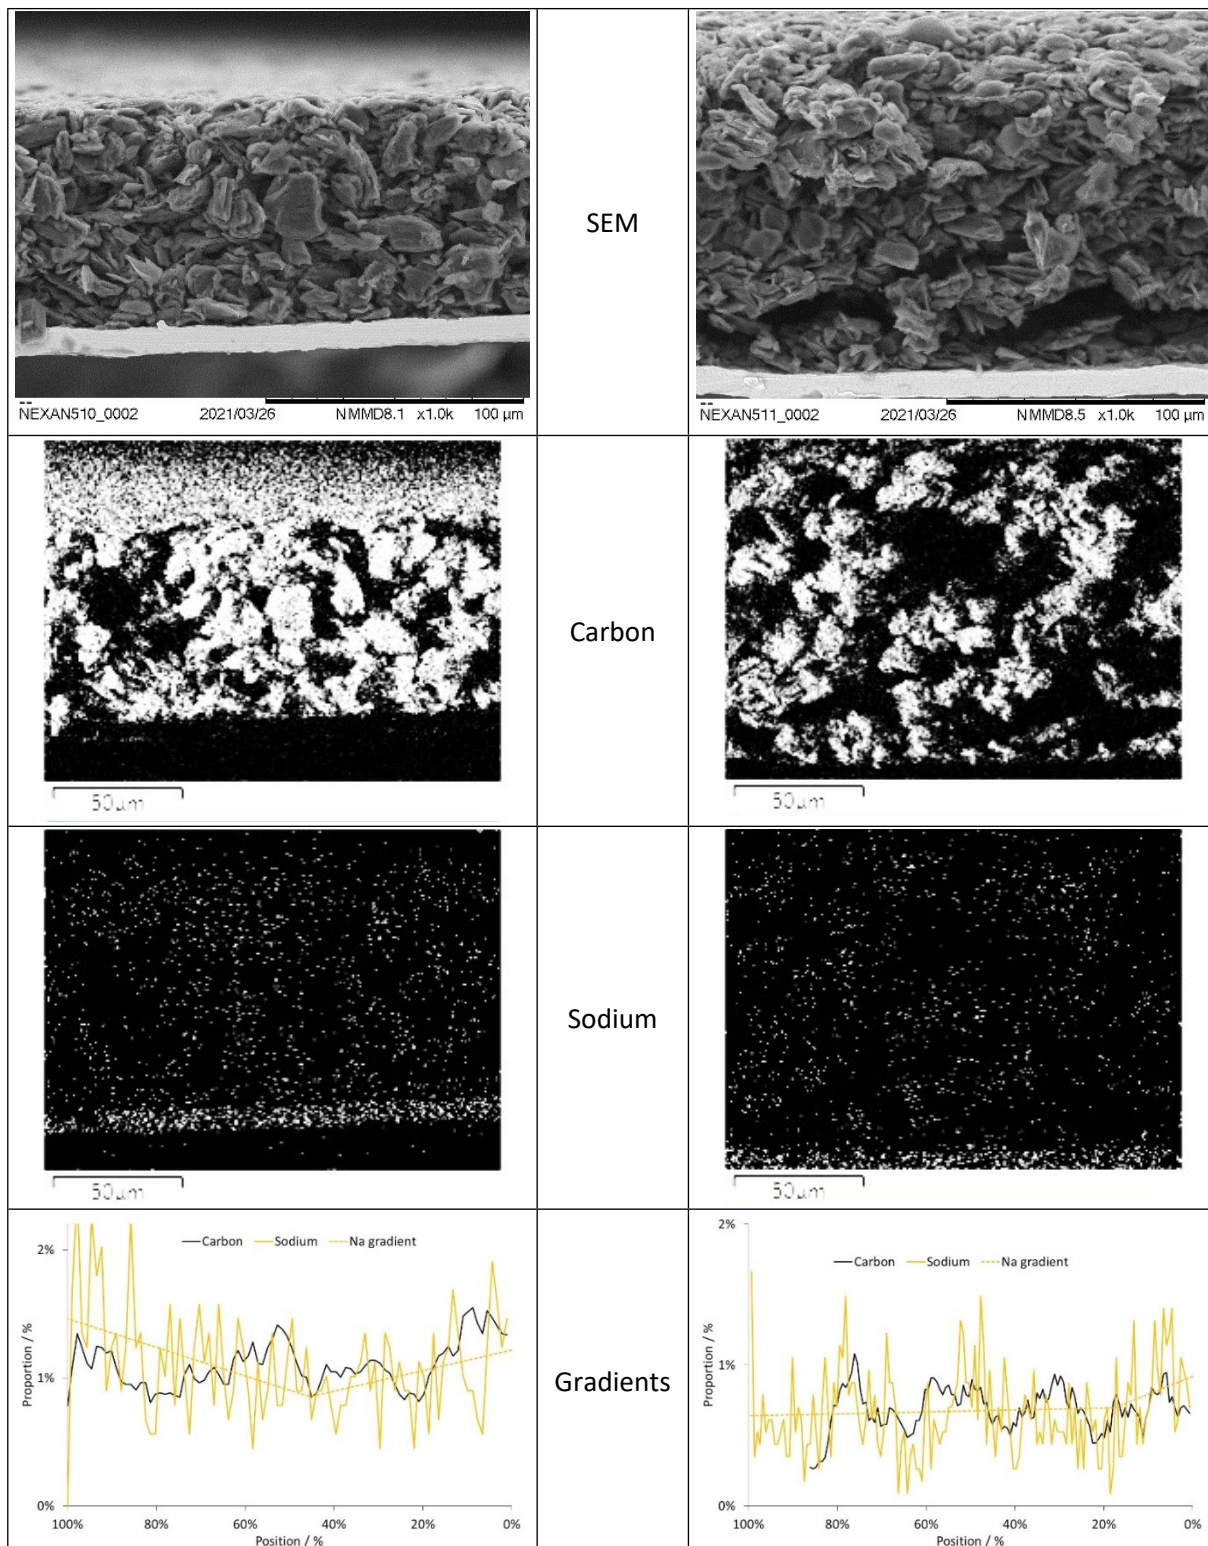

Figure S52. SEM Images And EDS Maps For Anode DoE (5\_10 And 5\_11)

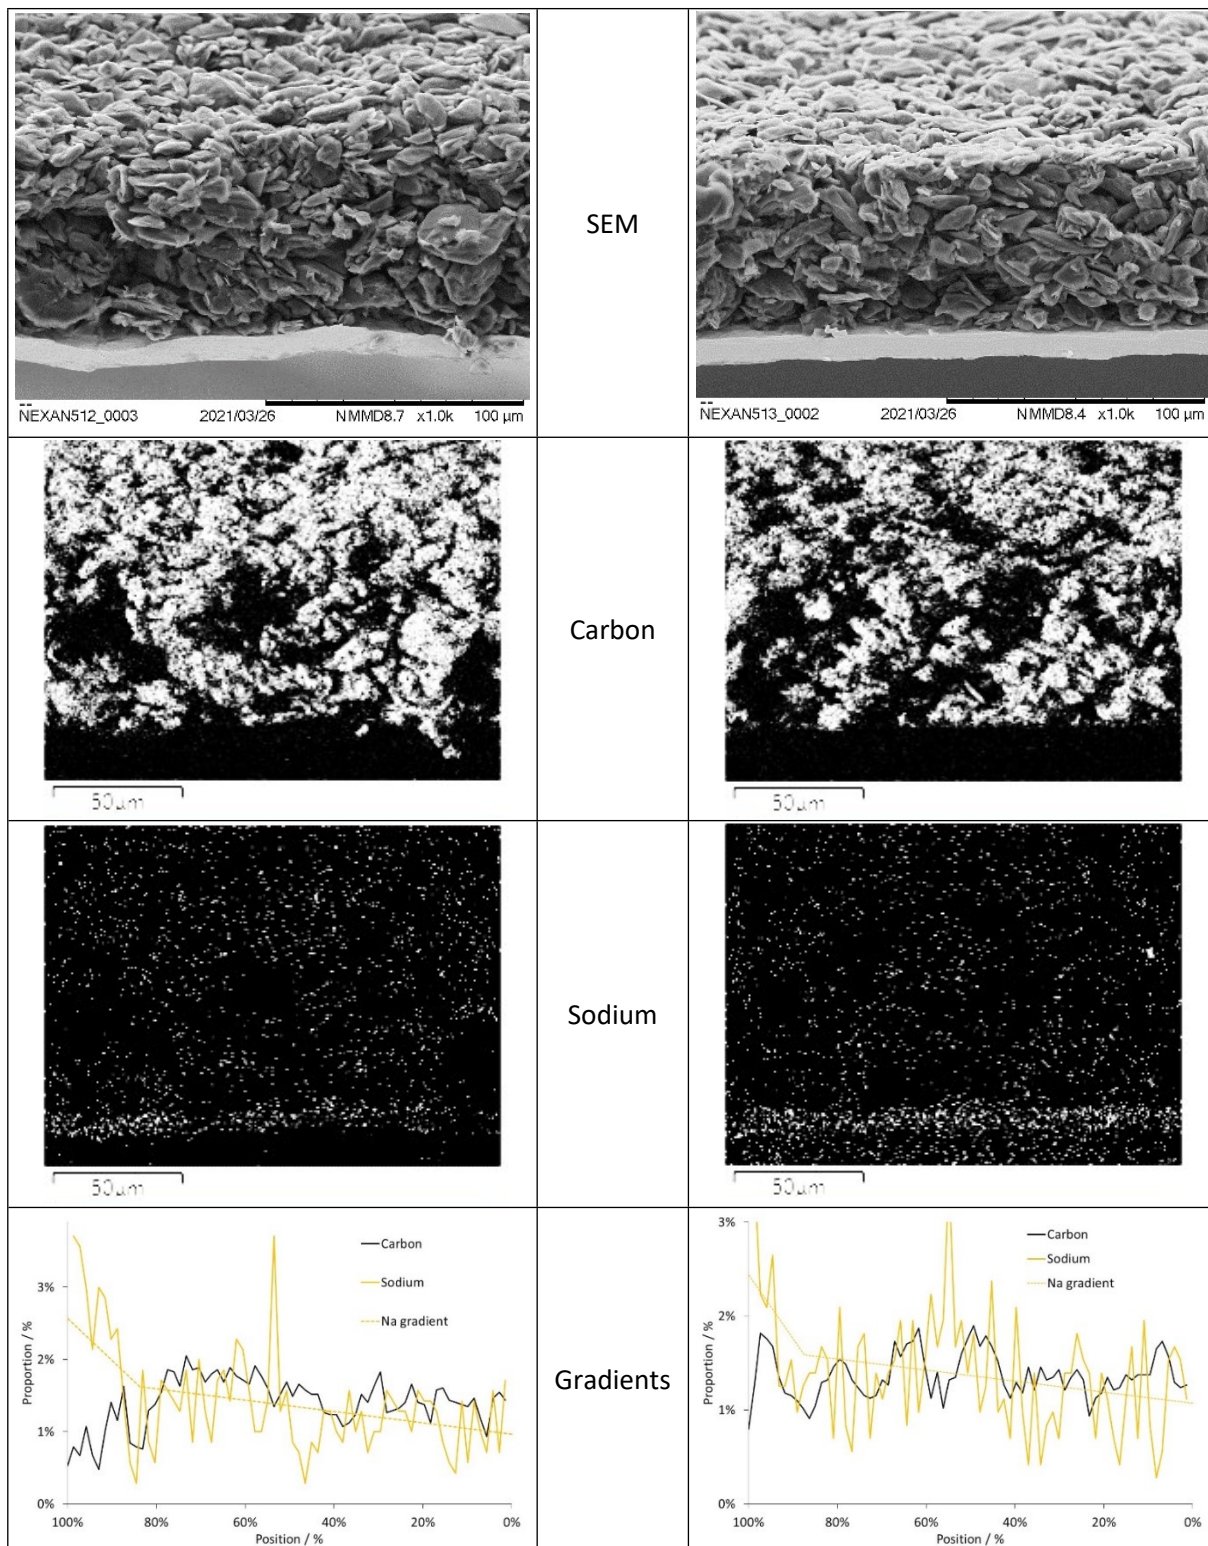

Figure S53. SEM Images And EDS Maps For Anode DoE (5\_12 And 5\_13)

## Peclet Number Calculations

During the drying stage of lithium ion electrode coating, three processes can occur <sup>[10]</sup> :-

- Diffusion      Mobile particles move to achieve a uniform distribution.
- Evaporation    Mobile particles move up towards the surface, as the solvent evaporates.
- Sedimentation Mobile particles move down towards the metal foil.

The predominant mechanism depends on the Peclet numbers for evaporation and sedimentation :-

$$\text{Peclet number for evaporation, } P_e (\text{evap}) = \frac{6\Gamma\mu R H_0 E}{kT}$$

$$\text{Peclet number for sedimentation, } P_e (\text{sed}) = \frac{4\Gamma R^4 g (\rho_s - \rho_f)}{3kT}$$

The definition of the symbols, and typical values for a cathode coating using PVDF / NMP <sup>[10]</sup> :-

|          |                                     |                                                                        |                                   |
|----------|-------------------------------------|------------------------------------------------------------------------|-----------------------------------|
| R        | particle radius                     | 5 $\mu\text{m}$ (active), 22 nm (conductive carbon)                    | (m)                               |
| $H_0$    | initial film thickness              | 200 $\mu\text{m}$                                                      | (m)                               |
| E        | rate of evaporation front reduction | 0.95, 14.5, $58.3 \times 10^{-9}$ at 25, 70 and 120 $^{\circ}\text{C}$ | $\text{m s}^{-1}$                 |
| k        | Boltzmann coefficient               | $1.38 \times 10^{-23}$                                                 | $\text{J K}^{-1}$                 |
| T        | Absolute temperature                | 298, 343, 393                                                          | K                                 |
| $\mu$    | Solvent viscosity                   | 10                                                                     | $\text{Pa s (J m}^{-3} \text{s)}$ |
| g        | Acceleration due to gravity         | 9.8                                                                    | $\text{m s}^{-2}$                 |
| $\rho_s$ | Density of particles                | 4.75 (active), 1.78 (PVDF), 1.95 (carbon)                              | $\text{g m}^{-3}$                 |
| $\rho_f$ | Density of surrounding fluid        | 1.03 (NMP)                                                             | $\text{g m}^{-3}$                 |

| Temperature          |        | $P_e$ (evaporation) |                   | $P_e$ (sedimentation) |                      |
|----------------------|--------|---------------------|-------------------|-----------------------|----------------------|
| / $^{\circ}\text{C}$ | / K    | Active              | Carbon            | Active                | Carbon               |
| 25                   | 298.15 | $4.4 \times 10^4$   | $1.9 \times 10^2$ | $2.3 \times 10^4$     | $8.7 \times 10^{-6}$ |
| 70                   | 343.15 | $5.8 \times 10^5$   | $2.5 \times 10^3$ | $2.0 \times 10^4$     | $7.6 \times 10^{-6}$ |
| 120                  | 393.15 | $2.0 \times 10^6$   | $8.9 \times 10^3$ | $1.8 \times 10^4$     | $6.6 \times 10^{-6}$ |

Based on these values, the active particles will sediment, but the conductive carbon will not. During the second stage of coating, carbon will move towards the surface, but this process is strongly temperature dependent. Solef<sup>®</sup> 5130 is a typical high molecular weight PVDF, used in cathode mixes. The molecular weight is 1.3 MDa and the density  $\sim 1.75 \text{ g cm}^{-3}$ , which gives a notional particle radius of around 7 nm, and a  $P_e$  (evap) value of  $\sim 1500$  at 100  $^{\circ}\text{C}$ .

NaCMC polymers with a molecular weight of 0.725 MDa and a density of  $\sim 1.0 \text{ g cm}^{-3}$  also have a notional particle radius of around 7 nm. However, because of the lower coating temperature and solvent viscosity, the  $P_e$  (evap) is less than 10. Thus, there is much more competition between evaporation and diffusion.
